# Supplementary material for: Analysis of the Effect of Intestinal Ischemia and Reperfusion on the Rat Neutrophils Proteome
Source: Front Mol Biosci. 2018 Nov 29;5:89. doi: 10.3389/fmolb.2018.00089 (PMC6281993; doi:10.3389/fmolb.2018.00089)
Supplement: Supplementary file 1 [file Table_1.xlsx]

## Sheet: Supplementary Table S1
Supplementary Table S1
List of all 2045 identified proteins and the respective normalized abundances in all conditions and replicates
Acc. No	control Rep 1	laparotomy Rep 1	ischemia Rep 1	control Rep 2	laparotomy Rep 2	ischemia Rep 2	control Rep 3	laparotomy Rep 3	ischemia Rep 3	control Rep 4	laparotomy Rep 4	ischemia Rep 4	control Rep 5	laparotomy Rep 5	ischemia Rep 5
A0JPJ7	-0.0426531	0.0295052	0.0131479	0.0273186	0.000217259	-0.0275359	0.00237744	-0.0505295	0.0481521	0.0427469	-0.0670521	0.0243052	-0.0182527	-0.0206089	0.0388616
A0JPM9	NA	NA	NA	NA	NA	NA	-0.017516	0.029373	-0.0118571	-0.00309423	-0.017962	0.0210562	NA	NA	NA
A1A5S1	NA	NA	NA	-0.0125966	-0.00413292	0.0167296	NA	NA	NA	NA	NA	NA	NA	NA	NA
A1L108	0.0641687	0.0170503	-0.081219	0.107795	-0.0610405	-0.046755	-0.0427178	0.0987243	-0.0560066	-0.0808412	0.0858934	-0.00505215	-0.00940812	-0.030945	0.0403531
A2A432	NA	NA	NA	0.0966983	-0.314563	0.217865	NA	NA	NA	-0.437802	0.186458	0.251344	NA	NA	NA
A2AF47	0.047707	0.0132884	-0.0609955	0.0485844	-0.0158515	-0.032733	NA	NA	NA	-0.0283705	0.0328491	-0.00447866	0.0359462	-0.010224	-0.0257222
A2AN08	NA	NA	NA	-0.0515031	0.0571442	-0.0056411	0.0790136	-0.0431816	-0.035832	NA	NA	NA	0.043959	0.031794	-0.075753
A2RRU1	0.0465546	-0.00125967	-0.0452949	-0.0917816	0.0864038	0.00537772	0.0941179	-0.059734	-0.0343839	0.139076	-0.0422584	-0.0968177	0.00335639	-0.0136797	0.0103233
A2RUW1	-0.0818733	0.0870173	-0.00514402	0.0223629	0.0397595	-0.0621224	-0.0110086	0.0193431	-0.00833458	0.0479049	-0.037151	-0.0107539	-0.0588688	0.0325163	0.0263525
A4L9P7	0.12791	-0.110161	-0.0177486	NA	NA	NA	NA	NA	NA	NA	NA	NA	0.156057	-0.0730698	-0.0829872
A7E3N2	0.0387892	-0.0559546	0.0171655	0.0441423	-0.0363001	-0.0078422	0.0817923	-0.0586996	-0.0230927	0.0467322	0.0028432	-0.0495754	0.0670833	0.0483711	-0.115454
A8WCF8	0.0481028	0.0143771	-0.0624798	0.0249814	-0.0471645	0.022183	NA	NA	NA	0.154409	-0.0810026	-0.0734067	0.00763179	-0.00178126	-0.00585053
B0BN18	0.0361897	-0.0646978	0.0285081	-0.0517111	0.0198206	0.0318904	-0.0365091	0.190392	-0.153883	0.0207353	-0.0174194	-0.00331592	0.0643136	-0.0140239	-0.0502898
B0BN85	-0.0614284	0.00311398	0.0583145	NA	NA	NA	NA	NA	NA	NA	NA	NA	NA	NA	NA
B0BN93	0.066726	0.000404911	-0.0671309	0.049813	0.00112053	-0.0509336	0.0225179	0.0417066	-0.0642245	-0.0410228	0.0125207	0.0285021	-0.0125291	0.000723972	0.0118051
B0BNA5	0.154187	-0.0621119	-0.092075	0.0487089	-0.0733229	0.024614	-0.00617092	0.0641605	-0.0579896	0.0435285	-0.0194731	-0.0240554	0.0418433	-0.0185896	-0.0232537
B0BNA7	0.0312384	0.00486321	-0.0361016	-0.0248779	-0.0179358	0.0428138	-0.022495	-0.117027	0.139522	NA	NA	NA	0.323752	-0.045188	-0.278564
B0BNM1	0.0436684	-0.0630889	0.0194206	0.00846299	0.0298303	-0.0382932	0.0740799	0.0827737	-0.156854	0.0424787	0.0450165	-0.0874952	0.0761067	-0.0314631	-0.0446437
B0BNM9	NA	NA	NA	NA	NA	NA	NA	NA	NA	-0.0520316	0.0744802	-0.0224486	NA	NA	NA
B0K020	-0.0493992	-0.0626746	0.112074	NA	NA	NA	NA	NA	NA	NA	NA	NA	NA	NA	NA
B0LT89	NA	NA	NA	NA	NA	NA	NA	NA	NA	0.046688	-0.0376372	-0.00905083	NA	NA	NA
B1AY13	-0.0568693	0.0930181	-0.0361488	-0.0968005	0.115792	-0.0189914	NA	NA	NA	0.0316473	-0.0344817	0.00283434	-0.0291062	-0.0278865	0.0569927
B1AZI6	0.139108	-0.100162	-0.0389459	-0.0538182	-0.149954	0.203772	-0.0978536	0.17635	-0.0784965	-0.0757631	-0.105772	0.181535	0.102502	-0.0914056	-0.0110961
B1H267	0.050031	-0.056119	0.00608799	-0.0447826	0.0637197	-0.0189371	-0.0809112	0.142402	-0.0614908	-0.0644052	0.0336087	0.0307965	-0.122213	0.071731	0.0504821
B2GUV7	NA	NA	NA	NA	NA	NA	NA	NA	NA	NA	NA	NA	0.0569675	0.0094085	-0.066376
B2GUZ1	NA	NA	NA	-0.0793605	-0.0285845	0.107945	NA	NA	NA	NA	NA	NA	NA	NA	NA
B2GUZ5	0.0744393	0.00563015	-0.0800694	0.0316393	0.023683	-0.0553224	0.103879	-0.00663428	-0.097245	0.0902949	0.0431635	-0.133458	-0.014115	0.0161681	-0.00205307
B2GV06	-0.0998545	0.0558942	0.0439603	NA	NA	NA	NA	NA	NA	-0.0839572	0.0138624	0.0700949	NA	NA	NA
B2GV24	0.035019	-0.0384491	0.0034301	-0.22085	0.105756	0.115094	NA	NA	NA	0.0575565	-0.0242811	-0.0332754	NA	NA	NA
B2GV54	0.129048	-0.0879861	-0.0410617	0.164808	-0.0191105	-0.145697	0.134847	0.0285131	-0.16336	0.226238	0.00102441	-0.227116	0.0992054	-0.023221	-0.0759844
B2GV87	0.0601661	-0.0424009	-0.0177653	-0.0338188	0.0382649	-0.0044461	0.0955925	0.0229022	-0.118495	-0.00558589	0.0514408	-0.0458549	-0.0137615	-0.0175282	0.0312898
B2RWS6	NA	NA	NA	NA	NA	NA	NA	NA	NA	NA	NA	NA	-0.0467169	-0.0883061	0.135023
B2RXR6	0.0435164	0.0117607	-0.055277	-0.0282191	0.00678371	0.0214354	0.0941996	-0.0553805	-0.0388191	-0.0121537	0.0346398	-0.0224861	-0.0420514	0.035506	0.00654536
B2RY04	NA	NA	NA	NA	NA	NA	NA	NA	NA	0.109904	-0.0127777	-0.0971264	0.0579162	-0.0511351	-0.00678101
B2RY56	0.0379746	-0.00600969	-0.0319649	0.0654343	-0.0872019	0.0217676	-0.0390685	0.0419783	-0.00290987	-0.0348165	-0.0194299	0.0542464	0.117034	-0.103907	-0.0131262
B2RYG7	0.0203043	-0.0281021	0.00779773	-0.065606	0.0316328	0.0339732	0.049748	-0.0413222	-0.00842583	0.041241	-0.0361495	-0.00509157	0.024707	0.00683442	-0.0315414
B2RZ37	-0.163972	0.0149615	0.149011	-0.0852291	0.00902311	0.0762059	-0.0672567	-0.0475294	0.114786	0.00623567	-0.0578412	0.0516056	0.00991158	0.0154416	-0.0253531
B2RZ78	-0.0592409	0.0726357	-0.0133948	-0.0651955	0.0129838	0.0522118	-0.0193446	0.00849041	0.0108542	0.00516345	-0.00548723	0.00032378	0.0992218	0.00906465	-0.108286
B3DMA2	0.0612818	0.0166017	-0.0778836	NA	NA	NA	NA	NA	NA	NA	NA	NA	-0.0274106	0.122228	-0.0948171
B4F777	0.0669048	0.0231005	-0.0900053	0.0821171	0.0185254	-0.100642	0.0161797	-0.0251264	0.00894669	0.0261308	0.0408157	-0.0669465	-0.0694262	-0.000213701	0.0696399
B4F795	0.209722	0.248286	-0.458008	NA	NA	NA	NA	NA	NA	NA	NA	NA	NA	NA	NA
B5DEH2	-0.105963	0.0675757	0.0383868	-0.0466715	0.102494	-0.055822	0.0796362	-0.0235798	-0.0560564	-0.109368	0.0712858	0.0380819	-0.0384585	0.0314265	0.00703195
B5DF89	-0.0563796	0.0195305	0.0368492	-0.0965375	0.0940699	0.00246756	-0.0173518	-0.027694	0.0450457	0.0350534	0.018263	-0.0533164	-0.00300401	0.0991869	-0.0961829
B5DFC8	0.125255	-0.155596	0.030341	-0.0619701	-0.0139801	0.0759503	-0.0484318	-0.0346582	0.08309	-0.159456	0.0533204	0.106136	-0.0760935	0.00391393	0.0721796
D3Z4S3	NA	NA	NA	0.172032	-0.0844751	-0.0875571	NA	NA	NA	NA	NA	NA	NA	NA	NA
D3ZAF6	NA	NA	NA	NA	NA	NA	0.0640832	0.0711033	-0.135187	-0.113454	0.0501592	0.0632951	-0.0328058	0.158384	-0.125578
D3ZBN0	0.106809	0.0619869	-0.168796	0.532941	-0.527386	-0.00555458	-0.213707	0.403908	-0.1902	-0.734886	0.362233	0.372653	0.146724	-0.10599	-0.0407346
D3ZBP4	0.126543	-0.0884107	-0.0381326	0.120782	0.0121793	-0.132961	0.181826	-0.0297272	-0.152098	0.0354306	0.037992	-0.0734226	0.0445328	-0.0869537	0.0424209
D3ZTX0	NA	NA	NA	-0.00499443	-0.0354786	0.040473	0.0352981	-0.0813097	0.0460116	NA	NA	NA	NA	NA	NA
D3ZW55	-0.01198	0.0470019	-0.0350219	0.000935337	-0.0551921	0.0542567	0.101009	-0.0634983	-0.0375107	-0.0103739	-0.00480501	0.0151789	0.0758322	-0.0856223	0.0097901
D4A3K5	NA	NA	NA	-0.0103307	-0.00282523	0.0131559	NA	NA	NA	NA	NA	NA	NA	NA	NA
D4A4T9	-0.155892	0.0117784	0.144114	-0.107591	0.0015956	0.105995	NA	NA	NA	NA	NA	NA	-0.0651755	-0.150485	0.215661
D4A631	0.000706733	-0.0628482	0.0621415	-0.431631	0.198125	0.233506	NA	NA	NA	-0.0972879	-0.0596077	0.156896	-0.0394211	-0.0108877	0.0503088
D4AAZ6	NA	NA	NA	NA	NA	NA	-0.309224	0.212261	0.0969629	-0.35473	-0.0548741	0.409604	NA	NA	NA
D4AE41	-0.0169876	0.0771485	-0.0601608	NA	NA	NA	-0.0904625	0.092674	-0.00221154	-0.0638618	0.00873481	0.055127	0.0100152	-0.0247293	0.0147141
E9PTG8	0.0240399	-0.0350372	0.0109973	0.0142426	-0.0451699	0.0309272	-0.000400922	-0.0603104	0.0607113	0.0161109	0.0068563	-0.0229672	0.0147773	-0.0486625	0.0338852
E9PU28	0.0573473	-0.0299272	-0.0274201	0.046073	-0.0654869	0.0194139	0.034745	-0.0280356	-0.0067094	-0.176627	0.0725107	0.104117	-0.0100998	-0.0223342	0.0324341
E9Q8I9	0.0867131	-0.0078058	-0.0789073	0.057993	-0.0694543	0.0114613	NA	NA	NA	0.0484523	-0.00114796	-0.0473043	-0.0144333	-0.0107598	0.0251931
F1LMZ8	0.0379831	-0.0166661	-0.021317	0.0125976	-0.00447936	-0.00811821	-0.0687008	0.0623552	0.0063456	-0.0863143	0.0436288	0.0426856	-0.0273725	-0.0554488	0.0828213
F1LP64	-0.0380072	0.101762	-0.0637543	-0.17002	0.0827933	0.0872272	-0.0548003	-0.120343	0.175143	-0.0845841	-0.0630167	0.147601	-0.0208673	-0.0464763	0.0673436
F1MA98	0.0723331	-0.0642262	-0.0081069	0.0508211	0.0283118	-0.0791329	0.0477005	-0.00807439	-0.0396261	0.00422868	0.0181115	-0.0223402	0.0231562	-0.026584	0.00342786
O08547	-0.0436332	0.0385829	0.00505032	0.00423894	0.0127881	-0.017027	0.0353371	0.0110007	-0.0463378	0.0118434	-0.0834952	0.0716518	0.0203559	-0.00152216	-0.0188338
O08553	NA	NA	NA	NA	NA	NA	NA	NA	NA	-0.299304	0.277458	0.0218453	NA	NA	NA
O08557	0.10538	-0.049591	-0.0557887	-0.0752244	0.0940333	-0.0188089	0.0739295	-0.0286441	-0.0452855	0.105833	0.0750258	-0.180858	0.0306866	-0.0283923	-0.00229422
O08560	NA	NA	NA	NA	NA	NA	NA	NA	NA	NA	NA	NA	-0.108075	0.0490387	0.0590363
O08583	0.0226232	-0.0200958	-0.00252742	0.113358	-0.142883	0.029525	0.0130782	0.0212632	-0.0343414	-0.0270196	-0.0799579	0.106978	0.0287143	-0.0610696	0.0323554
O08585	-0.054433	0.0485734	0.0058596	-0.00277984	-0.00656704	0.00934689	-0.0222942	-0.0709083	0.0932025	-0.0310783	0.0382739	-0.00719565	-0.0514545	-0.0351258	0.0865803
O08618	NA	NA	NA	NA	NA	NA	0.210056	0.0617853	-0.271841	-0.0571485	-0.0322796	0.0894281	NA	NA	NA
O08619	-0.0791725	-0.0129025	0.0920749	0.00321297	-0.0678202	0.0646072	-0.0733138	0.00824652	0.0650673	0.0392402	-0.00684267	-0.0323976	-0.0470015	0.0867019	-0.0397005
O08651	-0.144169	0.075774	0.0683947	0.047307	0.0659313	-0.113238	-0.0969717	-0.0568425	0.153814	-0.0581113	0.068326	-0.0102147	-0.00994391	0.0131423	-0.00319834
O08679	NA	NA	NA	NA	NA	NA	NA	NA	NA	NA	NA	NA	-0.0995047	-0.0235496	0.123054
O08730	0.187146	-0.0940161	-0.09313	0.206682	-0.158319	-0.0483624	0.0641319	-0.0547041	-0.00942784	0.0868203	-0.136542	0.0497213	0.0119587	-0.161516	0.149558
O08734	-0.120509	0.201116	-0.0806067	-0.0322869	0.241076	-0.208789	0.00616145	0.073339	-0.0795004	-0.314765	0.157717	0.157048	0.105482	-0.0503441	-0.0551378
O08770	NA	NA	NA	NA	NA	NA	NA	NA	NA	-0.176256	0.428111	-0.251855	NA	NA	NA
O08773	0.145736	-0.0149782	-0.130758	0.0332733	-0.0546519	0.0213785	0.0988848	0.0118464	-0.110731	0.103436	0.00882373	-0.11226	0.0412095	-0.0538073	0.0125979
O08795	-0.00356289	0.0586896	-0.0551268	-0.0111727	0.000904364	0.0102683	-0.0284157	0.00764646	0.0207693	-0.0526398	-0.0140378	0.0666776	-0.0559908	-0.0401401	0.0961309
O08808	0.0727607	-0.00456896	-0.0681917	0.163036	-0.0599743	-0.103061	0.0758007	-0.0203694	-0.0554313	0.129521	-0.0264064	-0.103115	0.0377731	0.0205153	-0.0582884
O08810	0.0301916	0.00779449	-0.0379861	0.0162357	-0.0428838	0.0266481	-0.0737134	0.0283401	0.0453734	-0.108922	0.00655541	0.102367	-0.0241262	-0.00476506	0.0288913
O08815	0.124135	-0.0494071	-0.074728	0.0528949	-0.0633579	0.0104629	0.0223116	-0.0498544	0.0275428	0.0235374	0.0531612	-0.0766985	0.0538024	0.0156515	-0.0694538
O08837	-0.0340212	0.0767883	-0.0427671	NA	NA	NA	-0.0623869	0.0281642	0.0342227	NA	NA	NA	-0.134786	0.00896855	0.125817
O08984	0.138213	0.000517292	-0.138731	0.0683623	0.0819457	-0.150308	0.126052	-0.0221989	-0.103853	0.127036	-0.0191299	-0.107907	-0.0173962	-0.0319274	0.0493236
O08992	NA	NA	NA	NA	NA	NA	0.058927	-0.0864681	0.0275412	NA	NA	NA	NA	NA	NA
O08997	0.0233702	-0.137354	0.113984	-0.0421516	-0.205632	0.247784	NA	NA	NA	-0.268423	0.100578	0.167845	-0.0716728	-0.0858931	0.157566
O09044	0.0570769	0.0732297	-0.130307	0.158691	0.00903344	-0.167724	0.170686	-0.12282	-0.047866	0.153078	0.029263	-0.182341	0.0405169	-0.0382034	-0.00231351
O09061	0.0602193	0.0411008	-0.10132	0.00311367	-0.0144035	0.0112899	0.0602453	0.0605978	-0.120843	-0.116404	0.0721579	0.0442459	0.0941059	-0.0197432	-0.0743627
O09106	0.0729089	0.00814004	-0.081049	0.0384414	-0.105867	0.067426	-0.0242349	0.0685547	-0.0443198	-0.0793718	-0.0367356	0.116107	-0.00978516	-0.0548864	0.0646715
O09110	0.124359	-0.0359765	-0.0883824	-0.0784936	0.0808544	-0.00236085	NA	NA	NA	0.031363	-0.00543109	-0.0259319	-0.0256776	-0.0660224	0.0917
O09159	-0.0210892	-0.0879277	0.109017	0.0501752	0.0664456	-0.116621	NA	NA	NA	NA	NA	NA	NA	NA	NA
O09167	-0.147636	-0.071559	0.219195	NA	NA	NA	-0.255172	0.102307	0.152865	NA	NA	NA	-0.0953534	0.0307076	0.0646458
O09175	0.0408711	-0.00090422	-0.0399669	-0.097983	0.0278846	0.0700983	0.0274126	-0.00896772	-0.0184449	0.0980867	-0.0116448	-0.0864419	-0.0297824	0.018255	0.0115274
O09178	-0.0113241	0.0539204	-0.0425963	0.0977799	-0.0447377	-0.0530422	NA	NA	NA	-0.113564	0.07373	0.0398339	NA	NA	NA
O09181	0.0145368	-0.025721	0.0111842	-0.0556174	-0.0184158	0.0740332	-0.0250626	0.0286433	-0.00358069	-0.0263687	-0.0508994	0.0772681	-0.00984195	-0.0731064	0.0829484
O35127	NA	NA	NA	NA	NA	NA	NA	NA	NA	NA	NA	NA	0.135111	0.0545288	-0.18964
O35129	-0.0492944	0.0573264	-0.00803199	0.066418	0.00156607	-0.0679841	-0.0867598	0.0515984	0.0351615	-0.157887	0.0450251	0.112862	0.0127682	-0.0900415	0.0772733
O35142	-0.00781504	0.00520392	0.00261113	-0.00713747	-0.021952	0.0290894	-0.0665684	-0.0413011	0.10787	-0.0140654	-0.0462751	0.0603405	-0.0478214	0.0426998	0.00512159
O35226	0.0180726	-0.0265501	0.00847748	-0.0454093	-0.0017825	0.0471918	-0.0339519	0.0299795	0.00397234	-0.0762773	-0.0317695	0.108047	-0.00735613	0.0409364	-0.0335803
O35239	NA	NA	NA	NA	NA	NA	0.0165289	0.0260369	-0.0425658	0.0665537	-0.0189387	-0.047615	-0.00395264	0.124909	-0.120956
O35244	0.0899005	-0.087836	-0.00206443	-0.0271029	0.0200997	0.00700317	-0.00970722	0.124454	-0.114747	0.114848	0.104835	-0.219682	-0.0468078	0.0264572	0.0203506
O35286	-0.0123682	0.00547852	0.00688972	-0.0141794	-0.0099572	0.0241366	-0.0814076	0.0844845	-0.00307691	-0.117426	0.038799	0.0786269	-0.0130189	-0.0445748	0.0575937
O35298	-0.276653	0.0648104	0.211843	NA	NA	NA	NA	NA	NA	NA	NA	NA	NA	NA	NA
O35309	NA	NA	NA	NA	NA	NA	NA	NA	NA	0.0315937	-0.228236	0.196642	NA	NA	NA
O35326	-0.0555828	0.0472456	0.00833716	-0.0629379	-0.0473147	0.110253	-0.106096	0.0285613	0.0775345	-0.287592	0.0381779	0.249414	NA	NA	NA
O35331	-0.167776	0.18507	-0.0172933	0.130699	-0.124722	-0.00597734	0.081436	-0.0948997	0.0134637	NA	NA	NA	-0.115008	-0.0325019	0.14751
O35343	NA	NA	NA	NA	NA	NA	NA	NA	NA	NA	NA	NA	0.0604186	0.00144385	-0.0618625
O35344	NA	NA	NA	0.0937798	-0.0980204	0.00424058	NA	NA	NA	NA	NA	NA	NA	NA	NA
O35381	0.0406282	-0.0763097	0.0356815	0.0619439	-0.0355905	-0.0263534	-0.055876	0.15054	-0.094664	-0.171781	0.103738	0.0680422	NA	NA	NA
O35501	NA	NA	NA	NA	NA	NA	NA	NA	NA	-0.244192	0.162454	0.0817373	NA	NA	NA
O35509	0.0712603	0.0276798	-0.0989401	0.0810212	-0.0175009	-0.0635203	-0.173427	0.397778	-0.224351	0.0478177	0.0163598	-0.0641776	0.014639	0.0128583	-0.0274973
O35547	NA	NA	NA	0.10564	0.192978	-0.298618	NA	NA	NA	NA	NA	NA	NA	NA	NA
O35567	0.0348375	0.00125452	-0.036092	0.0754316	-0.0210539	-0.0543777	-0.0418184	0.0681142	-0.0262958	-0.0653431	0.017642	0.047701	0.013447	0.0219549	-0.0354019
O35587	0.0506868	-0.00828352	-0.0424033	-0.0649877	0.0680725	-0.00308479	-0.0450629	-0.0226307	0.0676936	-0.0928165	-0.0117438	0.10456	-0.0480603	0.0502243	-0.00216401
O35593	0.0738465	-0.0582983	-0.0155482	0.0117826	0.0698511	-0.0816338	-0.0753306	-0.0630435	0.138374	-0.0217574	-0.0622053	0.0839627	0.0603067	-0.0571434	-0.0031633
O35598	0.0669996	-0.0478897	-0.0191099	0.108412	-0.0213646	-0.0870474	-0.0276043	-0.044635	0.0722394	0.00175881	-0.0724345	0.0706757	NA	NA	NA
O35601	NA	NA	NA	0.164352	-0.277884	0.113533	NA	NA	NA	-0.00178257	0.0105038	-0.00872122	0.0682775	-0.0472643	-0.0210133
O35609	-0.0537351	0.00388982	0.0498453	0.0283425	0.0863086	-0.114651	NA	NA	NA	NA	NA	NA	NA	NA	NA
O35638	0.0268039	-0.054397	0.027593	-0.0129319	-0.0233418	0.0362737	-0.0462941	0.00270791	0.0435862	-0.0427846	0.0034938	0.0392908	0.0649826	-0.148851	0.0838689
O35643	NA	NA	NA	NA	NA	NA	0.0810118	-0.132525	0.0515135	0.150851	-0.149934	-0.000916293	0.111032	-0.0482112	-0.068178
O35691	NA	NA	NA	0.165454	-0.086403	-0.0790508	0.216536	-0.23212	0.0311681	NA	NA	NA	NA	NA	NA
O35737	0.0897958	-0.18778	0.097984	0.0065137	0.0203422	-0.0268559	0.0437556	0.0433107	-0.0870662	-0.0426735	0.0818639	-0.0391904	NA	NA	NA
O35763	0.0644218	-0.0790938	0.014672	0.103179	-0.0244146	-0.0787648	0.0381971	-0.0341604	-0.00403677	-0.0607125	0.163519	-0.102807	0.0117925	0.0415293	-0.0533219
O35796	NA	NA	NA	0.0830137	0.0558276	-0.138841	0.0737393	0.0573887	-0.131128	NA	NA	NA	NA	NA	NA
O35814	-0.0221469	0.00180882	0.0203381	0.0233569	-0.0210985	-0.00225835	0.00618973	0.0183889	-0.0245787	-0.0530438	0.0319873	0.0210565	0.00196994	-0.0416176	0.0396476
O35821	0.0308498	-0.17136	0.14051	0.237252	-0.393477	0.156224	-0.467226	0.619915	-0.152689	-0.69872	0.325317	0.373403	0.0944988	-0.210863	0.116365
O35828	0.00905483	-0.00841917	-0.000635658	0.0605011	0.022786	-0.0832871	0.0416211	-0.0688284	0.0272073	0.0355526	0.0167636	-0.0523161	-0.0129651	0.0321506	-0.0191855
O35841	-0.00973704	0.0215264	-0.0117893	0.0386089	-0.124645	0.0860362	-0.0353197	0.0937632	-0.0584435	-0.125959	0.0377142	0.0882452	0.00327112	-0.0486138	0.0453426
O35864	0.0998761	0.046214	-0.14609	0.0277282	-0.0622074	0.0344792	0.0172206	0.0253984	-0.042619	NA	NA	NA	NA	NA	NA
O35900	-0.0833097	-0.0266432	0.109953	-0.0101367	0.00782705	0.00230961	NA	NA	NA	-0.129446	-0.00239982	0.131845	NA	NA	NA
O35910	NA	NA	NA	NA	NA	NA	0.257708	-0.131698	-0.12601	0.183028	-0.056344	-0.126684	0.0780726	-0.00358735	-0.0744852
O35952	NA	NA	NA	-0.119859	0.0361504	0.0837083	0.106296	-0.218435	0.112139	0.00152285	0.00895519	-0.010478	NA	NA	NA
O35964	-0.0626834	-0.0677503	0.130434	-0.00671373	-0.0744664	0.0811801	NA	NA	NA	-0.0487018	-0.0145074	0.0632092	-0.196011	-0.0173012	0.213312
O35987	0.0031361	-0.0132103	0.0100742	-0.0178221	0.0389174	-0.0210953	-0.0242554	0.0437966	-0.0195413	-0.0709016	0.0705653	0.00033631	0.0599008	-0.0694801	0.00957931
O54734	-0.060862	0.0360196	0.0248424	-0.0575534	0.00382804	0.0537253	-0.0745309	0.0125884	0.0619424	-0.0767268	0.0431587	0.0335682	-0.0300224	0.0704863	-0.0404639
O54772	0.118541	-0.0242039	-0.0943372	0.029172	-0.00646779	-0.0227042	NA	NA	NA	-0.0241609	0.0225766	0.00158435	NA	NA	NA
O54774	0.143404	-0.0160208	-0.127383	-0.110213	0.121925	-0.0117122	0.0871775	0.0656655	-0.152843	0.0459491	-0.185118	0.139169	0.0754477	-0.0121032	-0.0633446
O54790	0.0392547	-0.0828167	0.0435621	NA	NA	NA	0.0376326	-0.147295	0.109662	0.00231137	0.00706629	-0.00937766	-0.0358982	-0.0332282	0.0691264
O54824	-0.0462955	-0.0147196	0.0610151	-0.0274141	0.000857892	0.0265562	-0.0726551	-0.02209	0.0947452	-0.00578009	-0.0611641	0.0669442	0.0213355	-0.0324708	0.0111353
O54833	NA	NA	NA	NA	NA	NA	NA	NA	NA	NA	NA	NA	0.0786545	-0.136718	0.0580635
O54861	NA	NA	NA	-0.103441	0.104846	-0.00140588	NA	NA	NA	NA	NA	NA	0.0413939	0.0241796	-0.0655735
O54879	0.0597795	-0.0212917	-0.0384879	0.0610778	-0.0735379	0.0124601	NA	NA	NA	0.0243069	-0.00927772	-0.0150292	0.00531879	-0.0324771	0.0271584
O54890	-0.591932	0.642451	-0.0505189	-0.37265	0.824631	-0.451981	-0.214739	0.15645	0.0582884	-0.220351	0.505041	-0.28469	-0.23615	0.296855	-0.0607054
O54941	NA	NA	NA	-0.0888745	0.0769463	0.0119281	NA	NA	NA	NA	NA	NA	NA	NA	NA
O54950	0.0272693	0.00129857	-0.0285679	-0.264652	0.0177871	0.246865	0.028466	-0.0262502	-0.00221585	0.0352526	-0.0160305	-0.0192221	0.00827542	-0.0357622	0.0274867
O54975	0.0209822	-0.00743769	-0.0135446	-0.0599275	0.017063	0.0428645	NA	NA	NA	-0.0731763	0.0284612	0.0447151	-0.0805171	-0.0402284	0.120745
O54984	-0.007551	0.0206023	-0.0130513	-0.0329058	0.00566166	0.0272442	-0.198502	0.416507	-0.218005	-0.0726285	0.0421786	0.0304499	0.00626609	-0.0233399	0.0170738
O55006	-0.0409585	0.0262204	0.0147381	-0.0421105	0.173409	-0.131298	-0.153283	0.133722	0.0195611	0.103581	0.103701	-0.207282	-0.0940639	0.217542	-0.123478
O55012	0.165177	0.0763659	-0.241543	-0.112952	0.0435833	0.0693692	0.218212	-0.107552	-0.11066	0.118098	-0.063419	-0.0546788	0.14701	-0.000949731	-0.14606
O55013	0.123678	0.0368758	-0.160554	-0.0130452	0.0178064	-0.00476114	0.020217	-0.00338173	-0.0168353	0.048576	-0.000218264	-0.0483577	-0.0339823	0.0368843	-0.00290204
O55096	0.0356405	0.0414691	-0.0771096	-0.0408268	0.0525	-0.0116732	0.0419499	-0.0148595	-0.0270904	-0.0021325	-0.0278131	0.0299456	0.0469903	-0.0422182	-0.00477205
O55106	0.0771054	-0.0100938	-0.0670117	0.0923811	-0.0712665	-0.0211145	NA	NA	NA	NA	NA	NA	NA	NA	NA
O55128	0.0133338	-0.0115336	-0.00180027	0.0824507	-0.0985978	0.0161471	-0.0470999	0.0874342	-0.0403343	-0.108272	0.152259	-0.043987	-0.0220563	-0.0840451	0.106101
O55131	0.0919039	-0.0518179	-0.040086	0.0654785	-0.0977726	0.0322941	-0.0257679	0.0495351	-0.0237672	0.0115265	-0.0399359	0.0284095	0.0383639	0.104163	-0.142527
O55135	0.0273851	0.0562707	-0.0836558	-0.0523176	0.147906	-0.0955884	0.141997	-0.0617145	-0.0802821	-0.130488	0.11105	0.0194378	NA	NA	NA
O55142	-0.107968	-0.00189768	0.109866	-0.0080029	-0.0559829	0.0639858	-0.177678	0.0608995	0.116778	-0.389612	0.134072	0.25554	-0.105231	-0.0492218	0.154453
O55156	NA	NA	NA	NA	NA	NA	0.105191	-0.0734083	-0.0317828	NA	NA	NA	NA	NA	NA
O55171	NA	NA	NA	NA	NA	NA	NA	NA	NA	-0.159587	0.0512827	0.108304	NA	NA	NA
O55201	NA	NA	NA	0.0366564	-0.0897301	0.0530737	NA	NA	NA	0.119644	0.036028	-0.155672	NA	NA	NA
O55222	0.0356186	-0.0373296	0.00171095	-0.103943	0.0169256	0.0870178	0.0202652	0.049709	-0.0699743	-0.0524523	0.0472486	0.00520375	NA	NA	NA
O70133	0.0381517	-0.0260943	-0.0120574	0.0676756	-0.0556488	-0.0120268	0.00602925	0.107914	-0.113944	-0.0218422	0.0374637	-0.0156215	-0.0434565	-0.0104324	0.0538889
O70145	0.0592395	-0.0484264	-0.0108131	0.0434319	-0.00706683	-0.0363651	0.0287926	-0.0245698	-0.00422283	0.021363	0.052622	-0.073985	0.110462	-0.023492	-0.0869703
O70152	-0.00722078	0.00786758	-0.000646801	NA	NA	NA	NA	NA	NA	NA	NA	NA	NA	NA	NA
O70194	-0.0485905	0.0561763	-0.00758583	-0.0677164	0.029196	0.0385204	-0.0473465	0.01861	0.0287365	-0.0891111	0.010124	0.0789871	-0.0551478	0.00594847	0.0491993
O70196	0.0430988	0.0291061	-0.0722049	-0.0629719	-0.0151581	0.07813	-0.0195493	0.0628726	-0.0433234	-0.0963475	0.0642982	0.0320493	0.00819381	0.0649611	-0.0731549
O70251	-0.062236	0.00621357	0.0560224	-0.0425934	0.110273	-0.0676792	-0.124572	-0.0286038	0.153176	-0.14428	-7.02e-05	0.14435	-0.0484827	-0.0163078	0.0647905
O70257	0.0890849	-0.0626968	-0.026388	0.0630878	-0.0274972	-0.0355906	0.0168948	0.124932	-0.141827	0.0339528	0.041694	-0.0756468	-0.0237987	0.0283181	-0.00451937
O70293	NA	NA	NA	NA	NA	NA	0.05842	-0.0828156	0.0243956	NA	NA	NA	NA	NA	NA
O70310	-0.146025	0.0585249	0.0874997	-0.0028238	-0.0758734	0.0786972	-0.0502882	-0.074392	0.12468	-0.0714428	-0.0764115	0.147854	-0.162383	0.0100909	0.152292
O70351	0.124181	-0.0536821	-0.0704987	0.0815495	-0.076182	-0.00536752	0.119346	-0.123047	0.00370122	-0.0400891	0.0661988	-0.0261097	0.14849	-0.063706	-0.0847837
O70435	0.0332797	-0.0410147	0.00773504	NA	NA	NA	NA	NA	NA	0.00598114	0.00345196	-0.0094331	-0.0412901	-0.0503546	0.0916447
O70454	NA	NA	NA	0.0429859	-0.213188	0.170202	NA	NA	NA	NA	NA	NA	NA	NA	NA
O70492	0.0207608	-0.021202	0.000441245	-0.0115105	0.0314435	-0.0199329	-0.0172501	0.0253916	-0.00814146	-0.0251366	-0.0375375	0.0626742	-0.0372311	-0.029732	0.0669631
O70493	NA	NA	NA	NA	NA	NA	NA	NA	NA	-0.0111208	0.11544	-0.104319	NA	NA	NA
O70494	NA	NA	NA	NA	NA	NA	0.0124198	-0.178938	0.166519	NA	NA	NA	NA	NA	NA
O70521	0.0793096	-0.0718088	-0.00750079	-0.000565216	0.0445935	-0.0440283	NA	NA	NA	0.114738	-0.021697	-0.0930406	-0.0397867	-0.0141396	0.0539263
O70566	NA	NA	NA	0.130694	-0.225928	0.0952339	NA	NA	NA	0.0894196	-0.0759519	-0.0134676	NA	NA	NA
O70593	NA	NA	NA	NA	NA	NA	NA	NA	NA	-0.0678777	-0.0533751	0.121253	NA	NA	NA
O88307	0.299497	0.258053	-0.557549	-0.043515	0.294673	-0.251158	0.238714	0.0616056	-0.30032	0.199602	0.0342701	-0.233872	0.213892	0.0805993	-0.294491
O88351	NA	NA	NA	NA	NA	NA	NA	NA	NA	-0.159321	0.0367711	0.12255	-0.0363872	-0.0332118	0.069599
O88370	NA	NA	NA	NA	NA	NA	NA	NA	NA	0.078233	-0.00464356	-0.0735895	NA	NA	NA
O88453	0.0651378	0.0916447	-0.156783	0.140319	-0.0220928	-0.118226	0.0779206	-0.00972155	-0.0681991	-0.0589244	0.0698012	-0.0108769	0.0120062	-0.0342806	0.0222744
O88456	NA	NA	NA	NA	NA	NA	NA	NA	NA	NA	NA	NA	0.044577	-0.0430568	-0.00152016
O88487	NA	NA	NA	NA	NA	NA	NA	NA	NA	-0.0578238	0.0220287	0.0357951	NA	NA	NA
O88531	NA	NA	NA	NA	NA	NA	NA	NA	NA	NA	NA	NA	-0.145886	-0.000434275	0.14632
O88544	NA	NA	NA	NA	NA	NA	0.0184566	0.0590504	-0.077507	0.0114362	0.0177001	-0.0291363	0.0411602	-0.0604772	0.019317
O88545	NA	NA	NA	NA	NA	NA	-0.101015	0.11669	-0.0156744	-0.00423564	0.0405329	-0.0362973	0.0579042	-0.0344235	-0.0234807
O88569	0.0560296	-0.0338344	-0.0221952	0.0595736	-0.0433502	-0.0162234	-0.0244287	0.0673446	-0.0429158	-0.125936	-0.0100068	0.135943	-0.0315507	-0.0210596	0.0526103
O88588	NA	NA	NA	-0.00963201	-0.0598543	0.0694863	0.00763916	0.136723	-0.144363	0.136591	-0.0243156	-0.112275	0.102043	-0.118284	0.0162412
O88600	-0.00217705	-0.0258789	0.028056	0.0163701	0.00357314	-0.0199432	0.00821264	0.0429503	-0.051163	-0.0903368	-0.0207303	0.111067	-0.0209134	-0.0477633	0.0686768
O88653	0.0609293	-0.0987759	0.0378466	0.0168396	-0.0554193	0.0385797	0.102592	-0.0347883	-0.067804	0.0627213	-0.0876818	0.0249605	-0.0652788	0.0371975	0.0280813
O88656	0.00102684	-0.0445187	0.0434918	0.0269453	-0.059099	0.0321537	-0.0319544	0.0504637	-0.0185093	0.0272712	0.0101718	-0.0374429	-0.0138781	0.00382495	0.0100532
O88738	NA	NA	NA	NA	NA	NA	NA	NA	NA	NA	NA	NA	-0.0366011	0.0820676	-0.0454665
O88746	0.0510273	0.0417099	-0.0927372	-0.0400116	0.0112171	0.0287945	0.0676214	0.00448264	-0.072104	0.1054	-0.0412238	-0.0641767	0.000122217	0.045949	-0.0460712
O88761	NA	NA	NA	NA	NA	NA	NA	NA	NA	-0.0304346	-0.00982838	0.040263	NA	NA	NA
O88766	0.0645217	-0.156111	0.0915896	-0.169968	0.110924	0.0590441	-0.0353696	-0.0556829	0.0910526	0.202076	-0.0889287	-0.113147	-0.0450974	0.0129134	0.032184
O88767	0.0210057	-0.0116562	-0.0108065	0.0592097	-0.0391901	-0.0200196	-0.0496362	0.070533	-0.0208967	-0.139687	0.054176	0.0855107	0.0618717	-0.0133216	-0.0485501
O88775	0.0701682	-0.0122081	-0.0579601	-0.0600183	0.146566	-0.0865479	0.117152	0.17412	-0.291273	0.271943	0.0267871	-0.29873	NA	NA	NA
O88783	-0.0623733	0.051772	0.0106013	-0.0781958	0.180727	-0.102531	-0.097696	0.109042	-0.0113463	NA	NA	NA	-0.0840347	-0.0215336	0.105568
O88807	0.124674	-0.0273592	-0.0973146	0.0414586	0.0800752	-0.121534	0.128038	-0.0926485	-0.0353898	0.0626208	0.014265	-0.0768858	-0.0280527	-0.00654698	0.0345997
O88813	0.0509077	0.0317883	-0.082696	-0.161582	0.147746	0.0138362	0.10143	-0.0733257	-0.0281045	0.181815	-0.091151	-0.0906644	0.079287	-0.0593128	-0.0199741
O88842	NA	NA	NA	-0.114166	0.0731961	0.0409697	NA	NA	NA	NA	NA	NA	0.0176362	0.077576	-0.0952123
O88844	NA	NA	NA	NA	NA	NA	NA	NA	NA	-0.229782	0.146618	0.0831635	-0.0356151	-0.0154378	0.0510529
O88941	NA	NA	NA	NA	NA	NA	NA	NA	NA	-0.0292112	0.0630449	-0.0338337	-0.0564917	0.0634094	-0.00691771
O88958	-0.0204508	-0.0431089	0.0635597	-0.00604114	-0.024012	0.0300531	0.0117703	0.0631342	-0.0749046	-0.00366691	0.08437	-0.0807031	0.0492818	-0.0111692	-0.0381126
O88983	NA	NA	NA	NA	NA	NA	NA	NA	NA	-0.0185307	0.0150073	0.00352337	NA	NA	NA
O88989	0.000147572	-0.0562462	0.0560986	0.0276181	-0.0392342	0.0116161	-0.106052	0.113677	-0.00762507	-0.121192	0.0423947	0.0787971	0.0411013	-0.0533706	0.0122694
O89040	0.0606199	-0.00865634	-0.0519636	-0.147867	0.10609	0.0417776	0.0465769	0.0103225	-0.0568994	0.137255	-0.0299637	-0.107291	0.0667423	-0.0220234	-0.0447188
O89046	0.0601453	-0.0218085	-0.0383369	0.150172	-0.111272	-0.0389001	0.0048027	0.136126	-0.140929	0.0196526	-0.0679263	0.0482736	-0.0180936	-0.00438791	0.0224815
O89049	0.0319086	-0.0125298	-0.020771	0.0237401	0.00994539	-0.0322648	0.0350272	0.0881848	-0.110614	0.0441788	0.0477832	-0.091962	0.0708152	0.0631053	-0.13392
O89079	-0.119414	0.147941	-0.0285266	-0.0399273	0.0600662	-0.0201389	NA	NA	NA	-0.0330067	0.070071	-0.0370644	0.0266768	0.139091	-0.165768
O89086	NA	NA	NA	-0.0511188	-0.112692	0.163811	NA	NA	NA	NA	NA	NA	NA	NA	NA
P00173	-0.0526519	0.022756	0.0298959	-0.0131386	0.00297726	0.0101613	0.0969353	-0.0543476	-0.0425876	0.00618191	0.0553719	-0.0615538	0.0243327	-0.024388	5.52e-05
P00388	0.0441957	-0.0174019	-0.0267938	0.0983725	-0.0366403	-0.0617322	0.187216	-0.0934086	-0.0938075	0.0884794	-0.0428762	-0.0456032	0.16555	0.040722	-0.206273
P00406	NA	NA	NA	0.437957	0.515698	-0.953655	0.711084	0.0649349	-0.776019	NA	NA	NA	-0.0934564	0.136309	-0.0428527
P00507	-0.0550693	0.0182785	0.0367908	0.0387031	0.0167979	-0.055501	-0.0716858	0.0762155	-0.00452969	-0.0536517	0.0278329	0.0258188	-0.0386158	0.0109406	0.0276752
P00697	-0.0474538	-0.0168251	0.0642789	-0.0257819	0.0469446	-0.0211627	-0.0760177	0.178424	-0.102407	0.129084	-0.0329672	-0.0961172	-0.220365	0.0967311	0.123634
P00786	-0.0498116	0.0356051	0.0142066	0.00830538	-0.00645108	-0.0018543	-0.0215689	0.119677	-0.0981081	-0.00878497	0.0516416	-0.0428566	-0.0305848	0.140455	-0.10987
P00787	0.254398	-0.145293	-0.109105	0.0151415	-0.00244809	-0.0126934	-0.0309106	0.252297	-0.221386	-0.159423	0.245885	-0.0864625	0.0558111	-0.0214816	-0.0343295
P01026	-0.0326931	-0.117948	0.147172	-0.104804	0.0585415	0.0462625	0.00661907	-0.0336936	0.0279479	0.206929	-0.121696	-0.0852328	-0.0724537	0.0208999	0.0515538
P01027	0.0176644	-0.150256	0.132591	NA	NA	NA	NA	NA	NA	NA	NA	NA	-0.0748619	0.0942855	-0.0194237
P01041	0.0713606	0.0802025	-0.151563	0.037559	0.0551901	-0.0927491	0.0100518	0.0694738	-0.0795256	0.124548	0.0249362	-0.149484	0.0643405	0.108432	-0.172772
P01835	-0.18925	0.266238	-0.0769883	0.139545	0.15594	-0.295485	-0.0584242	0.0106202	0.047804	-0.0149088	-0.0242821	0.0391908	NA	NA	NA
P01946	-0.701453	0.17521	0.526242	-0.350576	0.555385	-0.204809	-0.434939	0.437069	-0.00213001	0.51682	-0.204585	-0.312236	0.78029	-0.352478	-0.427812
P02091	-0.643017	0.171763	0.471254	-0.279956	0.525962	-0.246006	-0.41959	0.455079	-0.035489	0.658255	-0.236318	-0.421937	0.802973	-0.385363	-0.41761
P02401	-0.0711959	-0.00459957	0.0757955	0.0216963	-0.130898	0.109202	-0.146259	0.0458344	0.100425	-0.263928	0.0374257	0.226502	-0.0889475	0.0415013	0.0474462
P02535	NA	NA	NA	0.317568	-0.317598	3.01e-05	NA	NA	NA	NA	NA	NA	NA	NA	NA
P02680	-0.909193	0.0703399	0.838853	-0.554551	-0.0159227	0.570474	-0.315614	-0.299385	0.614999	0.344881	0.299267	-0.644148	NA	NA	NA
P02764	0.0409549	-0.0941372	0.0531822	-0.265428	0.211917	0.0535117	-0.0335302	0.0679278	-0.0343976	0.342931	-0.155727	-0.187204	-0.0743945	-0.0791191	0.153514
P02767	NA	NA	NA	-0.132348	0.527817	-0.39547	-0.213549	0.585612	-0.372063	NA	NA	NA	-0.163036	0.518167	-0.35513
P02770	0.179864	0.152138	-0.332001	0.101665	-0.037002	-0.0646634	0.274569	0.0245225	-0.299091	0.445221	0.0743018	-0.519523	0.341052	0.140538	-0.481589
P02793	-0.0313499	-0.00590197	0.0372519	-0.0301888	0.185456	-0.155267	NA	NA	NA	NA	NA	NA	NA	NA	NA
P04041	0.141435	-0.170084	0.0286488	0.178301	-0.118608	-0.0596925	0.00315864	0.163381	-0.16654	0.189798	0.0627075	-0.252506	0.100798	0.0166234	-0.117421
P04157	0.141963	-0.0198874	-0.122075	0.112251	-0.0104618	-0.101789	0.0894151	0.00360141	-0.0930165	0.136635	0.018043	-0.154678	0.0413979	0.041218	-0.0826159
P04182	NA	NA	NA	0.32453	-0.463667	0.139137	NA	NA	NA	-0.596429	0.356659	0.23977	NA	NA	NA
P04256	-0.0106634	-0.0724059	0.0830693	-0.0533445	-0.119147	0.172492	-0.107648	0.0730999	0.0345481	-0.174405	-0.0977115	0.272117	0.0161859	-0.156873	0.140687
P04636	-0.0259091	0.062918	-0.0370089	0.052832	0.0262292	-0.0790611	-0.0527047	0.0299812	0.0227236	-0.131325	0.0772499	0.0540748	-0.023068	0.0097266	0.0133414
P04642	0.019823	-0.0500374	0.0302143	-0.0172727	-0.0522193	0.069492	-0.0214447	0.00746497	0.0139797	0.00862013	-0.0832653	0.0746452	-0.0399827	-0.0288958	0.0688785
P04644	-0.0726943	-0.0253236	0.0980179	0.0197506	-0.0929889	0.0732383	-0.18322	0.106894	0.0763258	-0.277544	0.126606	0.150938	-0.0423832	0.0191968	0.0231864
P04762	-0.174338	0.0305937	0.143744	0.158554	-0.2002	0.0416465	NA	NA	NA	NA	NA	NA	-0.0484535	-0.0290829	0.0775363
P04764	0.014988	-0.0671545	0.0521664	-0.0355098	-0.00974954	0.0452594	0.0453204	-0.0423244	-0.00299599	0.0171695	-0.00986138	-0.00730812	-0.00590679	0.00908202	-0.00317523
P04785	-0.148921	0.0433122	0.105608	-0.127725	-0.00184188	0.129567	-0.090565	-0.0641632	0.154728	-0.0475846	-0.0900288	0.134398	-0.0682524	-0.0172929	0.0855453
P04797	0.016495	0.0124694	-0.0289645	-0.0582252	0.11796	-0.0597343	0.0230019	-0.023538	0.000536098	0.0631469	-0.0441561	-0.0189908	-0.0127142	0.0081478	0.0045664
P04897	0.0907119	0.0442977	-0.13501	0.0221451	0.155948	-0.178093	0.0553992	-0.00548056	-0.0499186	0.0611545	0.0391779	-0.100332	-0.0393532	0.0221011	0.0172521
P04905	0.0241812	-0.0547068	0.0305256	0.0915677	-0.0705485	-0.0210193	-0.0139211	0.061668	-0.0477469	0.0280166	0.0758346	-0.103851	0.0305068	0.00319886	-0.0337056
P04906	0.100168	0.00362655	-0.103794	0.187476	-0.119847	-0.0676296	0.0811939	-0.0175616	-0.0636323	0.160651	-0.0436914	-0.11696	0.16508	0.0278747	-0.192954
P04937	-0.763251	0.0749232	0.688328	-0.275296	-0.359579	0.634876	-0.675369	-0.168359	0.843727	0.0859333	-0.0338598	-0.0520735	-0.0198173	0.436638	-0.41682
P04961	-0.164346	-0.0795399	0.243885	0.0939178	-0.385717	0.2918	-0.090883	0.188275	-0.097392	-0.654396	0.200352	0.454044	NA	NA	NA
P05065	-0.0352068	0.0378269	-0.00262015	0.0176862	0.0802135	-0.0978997	-0.0150089	-0.00404863	0.0190575	0.0640789	0.00838833	-0.0724672	-0.0526432	0.00733315	0.04531
P05132	0.240055	-0.00213552	-0.237919	-0.0736158	0.0472857	0.0263301	NA	NA	NA	-0.110453	0.0617661	0.0486868	0.0196321	-0.0788193	0.0591872
P05197	-0.0787994	0.0197443	0.0590551	-0.058082	0.00278713	0.0552948	-0.0909998	0.039684	0.0513158	-0.13647	0.0443028	0.0921673	-0.0254454	-0.00575119	0.0311966
P05369	0.0314399	0.0754298	-0.10687	NA	NA	NA	-0.0247471	-0.194486	0.219233	NA	NA	NA	-0.0325413	-0.182967	0.215508
P05370	0.0493042	-0.00947686	-0.0398273	0.0239497	-0.0231441	-0.00080563	0.0117739	-0.0305579	0.018784	0.0542365	0.0126868	-0.0669233	0.00415501	0.0156579	-0.0198129
P05426	-0.0695552	-0.0639221	0.133477	0.0158553	-0.151275	0.13542	-0.224385	0.105578	0.118807	-0.373383	0.093779	0.279604	-0.140472	-0.0131689	0.153641
P05555	0.0981748	0.016722	-0.114897	-0.0700738	0.225034	-0.15496	0.0652288	0.00217679	-0.0674056	0.0791281	-0.02958	-0.0495481	-0.00136913	0.0231221	-0.021753
P05708	0.115353	-0.000492801	-0.11486	0.0506928	0.044271	-0.0949638	NA	NA	NA	-0.0796673	0.160465	-0.0807976	-0.0383038	0.0426091	-0.00430528
P05712	NA	NA	NA	0.0307383	-0.0285699	-0.00216844	NA	NA	NA	NA	NA	NA	NA	NA	NA
P05765	-0.132326	0.0713617	0.0609643	0.0994994	-0.30178	0.202281	0.107318	-0.0289453	-0.0783729	NA	NA	NA	NA	NA	NA
P05942	-0.234872	0.156649	0.0782234	0.16177	-0.503872	0.342102	-0.763735	0.739097	0.0246376	-1.21384	0.795044	0.418793	-0.411422	0.219163	0.192259
P05964	-0.0600942	0.0584837	0.00161054	0.117428	-0.499165	0.381737	-0.46038	0.581935	-0.121555	-0.506393	0.384061	0.122332	-0.130579	0.0927209	0.0378576
P05982	0.108518	0.0440893	-0.152608	0.023022	0.0471325	-0.0701545	0.138184	0.000901258	-0.139085	0.216883	0.0150673	-0.23195	NA	NA	NA
P06214	NA	NA	NA	NA	NA	NA	NA	NA	NA	-0.0460038	0.0324922	0.0135116	NA	NA	NA
P06302	-0.109053	-0.0194751	0.128528	0.00892717	-0.0226367	0.0137095	-0.124622	0.142805	-0.0181829	-0.0591042	0.236435	-0.177331	-0.19695	0.0743049	0.122646
P06399	-0.695291	0.00908202	0.686209	-0.443297	0.0574587	0.385838	-0.471818	-0.180965	0.652783	0.4859	0.482618	-0.968518	-0.0224321	0.742608	-0.720175
P06685	0.0174967	0.0151858	-0.0326825	0.198755	-0.0919016	-0.106853	-0.0600916	0.145959	-0.0858674	-0.112777	0.141933	-0.0291557	-0.0574154	0.0265961	0.0308193
P06760	0.0336373	0.0365618	-0.0701992	-0.126064	0.113213	0.0128507	-0.0143461	0.00754489	0.00680119	0.0956454	-0.0387523	-0.0568931	0.072171	0.0226232	-0.0947942
P06761	-0.160022	0.0875478	0.0724745	-0.0891889	0.0447991	0.0443898	-0.0955974	-0.0592434	0.154841	-0.0720475	-0.0222844	0.0943318	-0.0303897	0.0177274	0.0126623
P06866	-0.241832	-0.190414	0.432246	-0.138836	0.075124	0.0637123	-0.109138	0.0123357	0.0968024	0.527251	-0.711286	0.184035	0.647321	-0.885873	0.238552
P07150	-0.0213949	0.0114235	0.00997142	-0.0880407	0.177208	-0.0891675	-0.0122083	0.111164	-0.0989561	0.130803	-0.0149842	-0.115818	-0.0341183	0.0939037	-0.0597854
P07151	-0.097829	-0.0559859	0.153815	0.0181365	-0.059015	0.0408786	0.12202	-0.0901974	-0.0318228	0.162051	-0.0636716	-0.0983798	-0.018492	-0.0377073	0.0561993
P07153	-0.0775764	0.0270537	0.0505226	-0.068642	-0.0214556	0.0900976	-0.00154178	-0.0216438	0.0231856	-0.167962	-0.101776	0.269739	-0.0741434	0.0224286	0.0517148
P07335	0.107813	-0.12264	0.0148275	NA	NA	NA	NA	NA	NA	NA	NA	NA	0.167382	-0.045754	-0.121628
P07632	-0.0391715	0.0078485	0.031323	-0.0429003	-0.0662261	0.109126	-0.164539	0.123386	0.0411533	-0.149471	0.0844147	0.0650563	-0.00133638	-0.00567235	0.00700872
P07724	NA	NA	NA	NA	NA	NA	0.188472	0.186522	-0.374995	0.760451	0.314048	-1.0745	NA	NA	NA
P07871	-0.111927	0.0876791	0.0242483	-0.150891	0.248368	-0.0974769	0.200492	-0.130307	-0.0701846	-0.0517457	0.0178316	0.0339141	0.1225	-0.0592942	-0.0632056
P07872	0.0723624	-0.0414669	-0.0308955	0.0885683	-0.0577898	-0.0307785	NA	NA	NA	0.106333	-0.0944512	-0.0118813	NA	NA	NA
P07895	-0.113679	0.291448	-0.177768	-0.00344991	0.23298	-0.22953	0.128961	-0.214773	0.0858123	-0.0833447	-0.0417454	0.12509	0.108682	-0.0341075	-0.0745749
P07943	0.0635789	-0.102829	0.0392499	0.305212	-0.185835	-0.119376	-0.0471667	0.0848913	-0.0377245	-0.0880455	0.0764465	0.011599	0.179236	-0.0843641	-0.0948722
P08011	-0.0533195	0.00293202	0.0503875	-0.280651	0.231423	0.0492277	-0.166641	0.08683	0.0798107	-0.0879319	-0.0247437	0.112676	-0.142905	0.146512	-0.0036079
P08032	-0.174649	0.159568	0.0150809	NA	NA	NA	NA	NA	NA	0.832041	0.0155934	-0.847634	NA	NA	NA
P08113	NA	NA	NA	0.00941169	-0.051164	0.0417523	NA	NA	NA	-0.148922	0.0432317	0.10569	NA	NA	NA
P08226	-0.0510748	0.0622822	-0.0112074	NA	NA	NA	NA	NA	NA	NA	NA	NA	NA	NA	NA
P08289	-0.198872	0.666979	-0.468107	-0.59929	0.768914	-0.169624	-0.0273927	-0.390416	0.417809	0.0145862	-0.410087	0.3955	0.270634	0.0731653	-0.343799
P08461	0.0453194	0.0201262	-0.0654456	0.138121	-0.0263369	-0.111784	-0.0547086	0.0593452	-0.00463656	-0.0947624	0.0722619	0.0225005	NA	NA	NA
P08503	-0.0222195	0.0901917	-0.0679723	NA	NA	NA	0.0285454	-0.0583965	0.0298511	0.00967288	0.0159996	-0.0256724	NA	NA	NA
P08556	0.109728	0.0563295	-0.166058	NA	NA	NA	NA	NA	NA	NA	NA	NA	NA	NA	NA
P08699	0.0102483	-0.00364013	-0.0066082	-0.107785	0.0569638	0.0508208	-0.0469737	0.0465411	0.000432585	0.0669101	0.0563454	-0.123256	-0.0412807	0.147633	-0.106353
P08753	0.0457202	0.0879341	-0.133654	-0.0304312	0.104406	-0.0739749	0.00143511	0.00609955	-0.00753466	0.0285621	0.0617945	-0.0903566	NA	NA	NA
P08775	NA	NA	NA	NA	NA	NA	NA	NA	NA	-0.038802	0.0135971	0.0252049	NA	NA	NA
P08955	0.0752524	-0.0406432	-0.0346091	-0.0612645	-0.0735981	0.134863	-0.0959138	0.122413	-0.0264991	-0.0870719	0.0456643	0.0414076	0.184073	-0.0835903	-0.100483
P09034	-0.237635	0.140064	0.0975709	0.00383556	-0.043569	0.0397334	-0.0171081	0.0761223	-0.0590143	-0.0982378	0.0923382	0.00589955	-0.146464	0.0460059	0.102758
P09055	-0.191749	0.333228	-0.14148	NA	NA	NA	NA	NA	NA	-0.319606	0.292016	0.02759	NA	NA	NA
P09215	0.110158	-0.0362781	-0.0738798	0.153849	-0.0305675	-0.123281	0.074527	-0.0288493	-0.0456777	0.128797	-0.0327067	-0.0960907	0.0384035	0.0319847	-0.0703883
P09330	NA	NA	NA	NA	NA	NA	-0.0442087	0.0504789	-0.00627021	NA	NA	NA	NA	NA	NA
P09456	0.0565836	0.00236436	-0.0589479	0.0432095	-0.0194235	-0.023786	0.0376215	-0.0151481	-0.0224735	0.0395152	0.0369899	-0.0765052	0.0511244	-0.041229	-0.0098954
P09495	0.0329581	0.0533019	-0.08626	0.0774783	-0.0072601	-0.0702182	-0.0726783	0.0514398	0.0212385	0.0506966	0.10767	-0.158366	0.0498956	-0.0121308	-0.0377649
P09527	0.0767675	-0.0147862	-0.0619814	0.0336369	0.0316347	-0.0652716	0.0908476	-0.0726252	-0.0182224	0.0917106	0.0206792	-0.11239	-0.00775881	0.00347832	0.00428048
P09528	NA	NA	NA	NA	NA	NA	NA	NA	NA	0.200042	-0.2149	0.0148581	NA	NA	NA
P09602	-0.0126051	-0.163034	0.175639	-0.0470085	-0.285775	0.332783	NA	NA	NA	0.0625393	-0.0989543	0.0364151	-0.135857	-0.0643747	0.200232
P09650	-0.5036	-0.681072	1.18467	NA	NA	NA	NA	NA	NA	1.80051	-1.28843	-0.512078	2.01257	-1.45127	-0.561302
P09811	0.0868753	-0.000199023	-0.0866763	-0.0187893	0.0576581	-0.0388687	-0.0188156	-0.0526905	0.0715061	0.115468	-0.0509344	-0.0645338	0.0443392	-0.0539992	0.00965998
P09895	-0.0991158	-0.0534808	0.152597	-0.0278844	-0.131622	0.159506	-0.193046	0.0794658	0.113581	-0.296887	0.0827229	0.214164	-0.0972873	-0.0381698	0.135457
P0C0A1	0.0314444	0.0137231	-0.0451676	-0.127165	0.0836366	0.0435286	0.0237499	0.0353698	-0.0591197	0.00978736	-0.0118752	0.00208784	0.0210631	0.0403036	-0.0613667
P0C0A2	0.0361921	-0.0630104	0.0268183	-0.0865363	-0.0478926	0.134429	NA	NA	NA	-0.0339822	0.0620763	-0.0280941	NA	NA	NA
P0C0R5	NA	NA	NA	NA	NA	NA	0.219721	-0.0988873	-0.120833	NA	NA	NA	NA	NA	NA
P0C0S6	0.0365964	-0.117606	0.0810094	0.0764179	-0.0772314	0.000813426	0.0270578	-0.031416	0.00435811	-0.0794944	0.0201243	0.0593701	0.0553733	-0.0213526	-0.0340207
P0C1Q3	0.0445498	-0.0161898	-0.0283601	0.0713519	-0.0654759	-0.00587597	0.0599807	0.0354925	-0.0954732	0.14792	-0.0398298	-0.10809	-0.0400906	0.0593663	-0.0192757
P0C1S9	NA	NA	NA	-0.0730711	0.00392474	0.0691463	NA	NA	NA	0.229889	-0.0781069	-0.151782	-0.0356189	0.250466	-0.214848
P0C2X9	0.0327916	0.0224839	-0.0552755	0.0789938	-0.169146	0.0901524	0.00652827	0.0483611	-0.0548893	-0.191588	0.179908	0.0116802	-0.0978218	0.184536	-0.0867139
P0C5H9	-0.150139	0.0415637	0.108575	NA	NA	NA	-0.116955	-0.00654131	0.123496	-0.0406306	-0.0830687	0.123699	-0.0469269	0.0407495	0.00617733
P0C643	-0.0278504	0.105883	-0.0780329	0.014708	0.0269541	-0.0416621	0.102607	-0.0524369	-0.0501697	0.0534118	-0.0024147	-0.0509971	-0.0140501	0.0543441	-0.040294
P10107	0.0590979	0.209251	-0.268349	0.0678105	-0.0390873	-0.0287232	0.0757499	0.225937	-0.301687	0.211076	-0.0659506	-0.145126	0.24156	-0.209633	-0.0319272
P10111	-0.0336714	-0.0419255	0.0755969	-0.0776252	0.10568	-0.0280546	-0.134664	0.284426	-0.149762	-0.0677813	0.124376	-0.0565951	-0.124707	0.204858	-0.0801504
P10252	0.0114125	-0.0323946	0.0209821	NA	NA	NA	-0.0253384	0.106075	-0.0807362	0.0928917	-0.0355995	-0.0572921	-0.0170964	0.0251323	-0.00803598
P10536	0.0257609	-0.00024423	-0.0255166	-0.0252319	0.00277005	0.0224618	0.0293604	-0.0777326	0.0483722	0.0219496	0.0196082	-0.0415578	-0.0201734	0.00879314	0.0113802
P10639	0.145528	-0.262714	0.117186	-0.0823021	0.240018	-0.157716	0.0574393	0.00188857	-0.0593278	-5.2e-06	0.26893	-0.268925	-0.0106154	0.149378	-0.138763
P10711	NA	NA	NA	0.207302	-0.163649	-0.0436534	NA	NA	NA	NA	NA	NA	-0.00148026	-0.0355854	0.0370657
P10719	-0.0586303	0.108747	-0.0501167	0.0734615	-0.00736372	-0.0660977	-0.0543756	0.0808687	-0.026493	-0.19054	0.0709357	0.119604	-0.0130086	-0.0182322	0.0312408
P10760	0.0510445	-0.0352089	-0.0158356	0.10863	-0.125346	0.0167154	-0.0757016	0.114016	-0.0383144	-0.0548766	0.0553396	-0.000462952	0.0371124	-0.0282512	-0.00886122
P10818	0.000117541	0.0893122	-0.0894297	NA	NA	NA	0.000843513	-0.0126386	0.0117951	-0.0127794	-0.0239505	0.03673	NA	NA	NA
P10854	0.0856859	-0.0465628	-0.0391231	NA	NA	NA	NA	NA	NA	NA	NA	NA	NA	NA	NA
P10860	0.0191369	0.0409782	-0.0601151	0.262355	-0.15598	-0.106375	-0.0324507	0.0971447	-0.064694	-0.176687	0.161301	0.0153859	-0.0339801	0.048441	-0.0144609
P10888	-0.0331957	0.00115666	0.032039	0.059105	-0.0154502	-0.0436548	-0.048887	0.0583028	-0.00941586	-0.0278208	0.052524	-0.0247032	-0.0872258	0.0115327	0.0756931
P10960	0.0932718	-0.0939459	0.000674131	0.162035	-0.222326	0.0602906	0.00712018	0.262186	-0.269307	-0.16907	0.349158	-0.180088	-0.11392	-0.0266825	0.140603
P11030	-0.0840933	-0.0263902	0.110484	-0.0705947	-0.11793	0.188525	-0.13345	0.0270836	0.106366	-0.0622272	-0.134914	0.197141	-0.138224	-0.00329904	0.141523
P11240	-0.00859436	0.0409736	-0.0323792	3.26e-05	0.0450281	-0.0450606	0.0183249	-0.12973	0.111405	-0.11724	0.0380426	0.0791973	-0.0900507	0.0338141	0.0562366
P11247	0.114379	-0.135995	0.0216161	-0.029138	0.137237	-0.108099	0.0370872	0.0595075	-0.0965947	0.155189	0.0180795	-0.173268	-0.00658682	0.141457	-0.13487
P11250	-0.101623	-0.0246107	0.126234	-0.133037	-0.14533	0.278367	NA	NA	NA	-0.399937	0.116488	0.283449	-0.14163	-0.0283212	0.169951
P11348	0.0420707	0.152814	-0.194885	0.146695	-0.0578867	-0.0888082	0.0584887	-0.180113	0.121624	NA	NA	NA	NA	NA	NA
P11442	0.0578343	-0.0109823	-0.046852	0.0172634	0.00673841	-0.0240018	0.0403599	0.0301309	-0.0704908	0.00169506	0.00441538	-0.00611044	-0.0259464	-0.0106595	0.0366058
P11499	-0.109388	-0.0758418	0.185229	-0.0194927	-0.13323	0.152723	-0.187383	0.0307127	0.15667	-0.176704	-0.038002	0.214706	-0.0683478	-0.0322487	0.100596
P11505	0.110934	0.034801	-0.145735	NA	NA	NA	NA	NA	NA	NA	NA	NA	NA	NA	NA
P11507	-0.137505	0.203701	-0.0661969	0.0327005	-0.00570663	-0.0269939	-0.0327261	0.121664	-0.0889379	-0.23133	0.144441	0.0868888	-0.00193937	-0.0113938	0.0133332
P11517	-0.394894	-0.260215	0.655109	-0.538619	0.794222	-0.255603	-0.418939	0.65244	-0.233501	NA	NA	NA	NA	NA	NA
P11598	-0.140855	0.0439034	0.096952	-0.0183291	-0.00973761	0.0280667	-0.113358	-0.0149306	0.128289	-0.0905039	0.000270906	0.090233	-0.0349553	0.0077264	0.0272289
P11608	-0.00462668	0.0520506	-0.0474239	0.07375	-0.0588464	-0.0149037	-0.00280955	-0.0317283	0.0345378	-0.159074	0.130777	0.0282966	NA	NA	NA
P11654	0.133721	-0.0088873	-0.124833	0.0288978	0.00545815	-0.0343559	0.00916244	0.101871	-0.111033	-0.0869893	0.00201443	0.0849749	0.0251409	-0.0429017	0.0177609
P11672	0.402267	-0.178614	-0.223653	NA	NA	NA	0.326676	-0.17016	-0.156515	NA	NA	NA	NA	NA	NA
P11730	0.133418	-0.029588	-0.10383	-0.137404	0.009755	0.127649	NA	NA	NA	0.169309	-0.0362359	-0.133073	0.0883925	-0.0165805	-0.071812
P11835	0.0773217	-0.00925752	-0.0680642	-0.0455149	0.188512	-0.142997	0.0305576	0.0860191	-0.116577	0.127402	0.0405435	-0.167946	-0.031831	0.0510352	-0.0192042
P11884	0.495115	0.156797	-0.651913	NA	NA	NA	0.263948	-0.418962	0.155014	NA	NA	NA	NA	NA	NA
P11915	-0.347106	0.186592	0.160514	-0.290774	0.0272569	0.263517	-0.11907	-0.157181	0.276251	-0.164308	-0.0872641	0.251572	-0.105427	-0.0103202	0.115748
P11951	-0.043461	0.000261214	0.0431998	0.0568884	-0.0045484	-0.05234	-0.00549961	-0.017928	0.0234276	-0.0636466	0.107272	-0.0436254	-0.109981	0.0311518	0.0788297
P11980	0.0557916	-0.0215351	-0.0342566	-0.0195435	0.00574498	0.0137985	0.146931	-0.0208565	-0.126074	0.116915	0.00547438	-0.12239	-0.00968382	0.043115	-0.0334312
P12001	-0.0805914	-0.0518428	0.132434	0.0467336	-0.119398	0.0726645	-0.248843	0.173929	0.0749146	-0.358612	0.116212	0.2424	-0.0953424	-0.0430386	0.138381
P12075	0.02053	-0.0259091	0.00537908	0.0724542	0.0524683	-0.124923	-0.100694	0.127708	-0.0270135	-0.0513829	0.063524	-0.0121412	-0.0140506	0.0118076	0.00224291
P12346	-0.0198549	-0.129478	0.149333	-0.167765	0.215716	-0.0479517	-0.0914145	0.123739	-0.0323245	0.253586	-0.0671972	-0.186389	-0.136299	0.18739	-0.051091
P12382	0.0887864	-0.0116344	-0.077152	0.0365028	0.0468128	-0.0833156	0.122909	-0.00297898	-0.11993	NA	NA	NA	NA	NA	NA
P12387	-0.0690731	-0.0782113	0.147284	-0.0348965	0.0451081	-0.0102116	-0.0765454	-0.00491523	0.0814606	0.202759	-0.109729	-0.0930307	-0.107195	0.0323002	0.0748949
P12527	-0.100074	0.0389453	0.0611284	-0.131724	0.0796587	0.0520649	0.0250883	-0.0923201	0.0672317	0.126282	-0.193363	0.0670812	-0.020556	-0.030294	0.05085
P12711	-0.0198415	0.0206563	-0.000814757	-0.12633	0.0549	0.0714297	NA	NA	NA	-0.0122582	-0.0278325	0.0400907	0.0866959	-0.0745035	-0.0121924
P12749	NA	NA	NA	NA	NA	NA	NA	NA	NA	NA	NA	NA	-0.0598021	-0.0527923	0.112594
P12785	-0.0497034	0.0908123	-0.0411089	-0.102627	0.0551347	0.0474921	-0.0155432	0.0897423	-0.0741991	-0.0730238	-0.0364429	0.109467	0.117767	-0.0307089	-0.087058
P12804	NA	NA	NA	-0.155164	0.439943	-0.284779	NA	NA	NA	NA	NA	NA	NA	NA	NA
P12815	0.0798879	0.00370073	-0.0835886	NA	NA	NA	NA	NA	NA	-0.027814	0.0173775	0.0104365	NA	NA	NA
P12970	-0.0442867	-0.0320589	0.0763456	-0.00100152	-0.143643	0.144644	-0.228786	0.0887852	0.140001	-0.278507	0.063294	0.215213	-0.0834727	-0.0420839	0.125557
P13084	-0.0260018	-0.0336705	0.0596723	0.156891	-0.174244	0.0173522	-0.12844	0.163237	-0.0347962	-0.311046	0.147856	0.163189	-0.0186375	-0.0792741	0.0979116
P13086	-0.0339241	0.0121329	0.0217912	0.135872	-0.0808152	-0.0550565	0.00281047	0.0372147	-0.0400252	-0.128828	0.0565677	0.0722599	-0.130206	0.0862023	0.044004
P13221	-0.0508874	0.0224923	0.028395	0.0649557	-0.114134	0.0491781	-0.0322265	0.104125	-0.0718984	-0.100209	0.0772001	0.0230085	0.0152201	-0.0190247	0.00380461
P13233	-0.0933866	0.0168417	0.0765448	0.0953921	0.051599	-0.146991	NA	NA	NA	NA	NA	NA	-0.0274549	-0.0512258	0.0786807
P13383	-0.075947	-0.0505588	0.126506	0.0797117	-0.184314	0.104602	-0.2303	0.132638	0.0976618	-0.288505	0.073512	0.214993	-0.0175864	-0.0748811	0.0924675
P13437	0.0949712	0.120859	-0.215831	-0.166854	0.190928	-0.024074	0.0668804	-0.00709032	-0.0597901	-0.0851124	0.101722	-0.01661	0.165574	0.0811479	-0.246722
P13439	NA	NA	NA	NA	NA	NA	NA	NA	NA	-0.171376	0.125449	0.0459266	NA	NA	NA
P13471	-0.0775388	0.00497113	0.0725677	0.0300807	-0.0748215	0.0447408	-0.120669	0.0597618	0.0609075	-0.0893802	-0.0193311	0.108711	-0.05997	-0.00138576	0.0613557
P13668	-0.163344	-0.0201615	0.183505	-0.137935	-0.0377383	0.175674	-0.0811294	-0.041226	0.122355	-0.112758	0.0346093	0.0781488	-0.108888	0.0089468	0.0999407
P13676	0.0334163	0.00784226	-0.0412586	0.0489917	0.0179467	-0.0669384	0.013457	0.0445308	-0.0579878	0.0017025	-0.00519221	0.00348971	0.0460024	-0.0610541	0.0150517
P13803	-0.0719134	0.113526	-0.0416129	-0.0189304	0.0103839	0.00854653	-0.0257475	0.0145298	0.0112178	-0.0371373	0.00925618	0.0278811	0.00447067	-0.0526382	0.0481676
P13832	NA	NA	NA	NA	NA	NA	NA	NA	NA	0.035444	-0.071096	0.035652	NA	NA	NA
P13838	-0.0572876	0.120474	-0.0631864	-0.00706791	0.0260265	-0.0189586	-0.0718059	0.00147785	0.070328	-0.0178624	0.0755823	-0.0577199	NA	NA	NA
P14131	-0.0901369	-0.04073	0.130867	-3.64e-05	-0.161508	0.161545	-0.170674	0.0191784	0.151496	-0.209761	0.0725845	0.137176	-0.144229	0.0052449	0.138984
P14206	-0.137973	0.00829238	0.129681	-0.144861	-0.0244029	0.169264	-0.241874	0.0691861	0.172688	-0.29735	0.0700692	0.22728	-0.13144	0.000378291	0.131062
P14408	0.0603778	-0.01683	-0.0435478	0.018728	-0.0292989	0.0105709	0.0328827	-0.0389693	0.00608654	-0.162267	0.11191	0.0503578	-0.0418873	0.0606008	-0.0187135
P14480	-0.936832	0.0964752	0.840357	-0.613385	-0.109264	0.722648	-0.654817	-0.294381	0.949198	0.554308	0.522007	-1.07631	0.213493	0.953129	-1.16662
P14562	0.0349595	0.0196804	-0.0546399	-0.0317445	0.073167	-0.0414224	-0.0363172	0.0357689	0.000548272	-0.132124	0.120687	0.0114372	-0.0437633	0.0297436	0.0140197
P14604	0.108574	0.0804094	-0.188983	0.131052	-0.0910773	-0.0399745	-0.035016	0.0849502	-0.0499342	-0.11675	0.0379009	0.0788488	0.0969289	-0.203745	0.106816
P14668	-0.0205235	0.219509	-0.198985	0.158403	-0.333328	0.174925	NA	NA	NA	-0.526545	0.340024	0.186522	0.0836811	0.0773928	-0.161074
P14669	0.0663342	-0.10339	0.0370561	0.031848	-0.0719464	0.0400984	0.0407875	-0.0636127	0.0228252	0.105856	-0.012553	-0.0933031	-0.0429657	0.0172	0.0257656
P14685	0.0497699	-0.00975658	-0.0400133	-0.0472433	0.0407582	0.00648512	-0.0443979	-0.0014082	0.0458061	-0.0416566	0.0269206	0.014736	-0.00735159	0.00127133	0.00608026
P14733	0.0590034	-0.0351353	-0.0238681	NA	NA	NA	-0.0236685	0.169183	-0.145514	NA	NA	NA	NA	NA	NA
P14740	NA	NA	NA	NA	NA	NA	NA	NA	NA	NA	NA	NA	0.371918	-0.131972	-0.239946
P15178	-0.0235069	0.0242159	-0.000709011	-0.0232214	-0.0218374	0.0450588	-0.0585188	0.0147809	0.0437378	-0.0770047	0.00390368	0.073101	-0.0474613	-0.0144632	0.0619245
P15337	NA	NA	NA	NA	NA	NA	NA	NA	NA	-0.00196569	0.0182343	-0.0162686	0.0717778	-0.0663809	-0.00539684
P15508	-0.270629	0.403819	-0.13319	NA	NA	NA	NA	NA	NA	0.6958	0.0083209	-0.704121	NA	NA	NA
P15650	-0.0336993	0.0656731	-0.0319738	0.120531	-0.0359713	-0.08456	0.0388756	0.0291831	-0.0680588	-0.101651	0.0881011	0.01355	-0.037044	-0.0182235	0.0552675
P15684	0.0839876	-0.0427073	-0.0412803	0.0850907	0.0632749	-0.148366	0.053259	0.00250425	-0.0557633	0.0950659	0.0168825	-0.111948	0.0072624	-0.00554914	-0.00171327
P15864	0.0556447	-0.0856667	0.030022	0.0698368	-0.0645611	-0.00527567	0.0209991	-0.131441	0.110442	-0.0706601	0.147573	-0.0769129	-0.022704	0.0116147	0.0110893
P15865	0.014626	-0.0513502	0.0367242	0.0659921	-0.11501	0.0490183	0.00815764	-0.018085	0.0099274	-0.0646097	0.0387912	0.0258185	0.0139167	0.00366877	-0.0175855
P15978	0.184308	-0.109684	-0.0746246	0.175473	-0.0350912	-0.140382	-0.00436539	0.11178	-0.107415	NA	NA	NA	NA	NA	NA
P15999	-0.0190657	0.0509765	-0.0319107	0.0716928	0.00223372	-0.0739266	-0.0662271	0.0623168	0.00391031	-0.191048	0.0647476	0.1263	-0.0454739	0.01895	0.0265239
P16036	0.0148638	0.0422147	-0.0570785	0.075401	-0.0121202	-0.0632808	-0.0142654	0.0527319	-0.0384664	-0.132669	0.032834	0.0998345	NA	NA	NA
P16052	0.101738	-0.0448131	-0.0569249	NA	NA	NA	0.0835135	0.00117709	-0.0846906	-0.0504929	0.0751376	-0.0246447	0.00163167	-0.0293698	0.0277381
P16086	0.0300256	-0.0226599	-0.00736569	0.0494385	-0.00864046	-0.040798	0.0444209	-0.0019967	-0.0424242	0.00515485	0.00711811	-0.012273	-0.00496801	-0.0267387	0.0317067
P16254	0.0301595	-0.0517307	0.0215712	NA	NA	NA	-0.0548815	-0.10556	0.160442	NA	NA	NA	NA	NA	NA
P16257	-0.0627671	0.141696	-0.0789285	-0.237853	0.212835	0.0250182	0.0380294	-0.116722	0.0786922	0.120912	-0.378319	0.257406	0.0803607	-0.0292653	-0.0510954
P16381	NA	NA	NA	-0.11326	0.0216433	0.0916168	NA	NA	NA	NA	NA	NA	NA	NA	NA
P16391	NA	NA	NA	NA	NA	NA	NA	NA	NA	NA	NA	NA	-0.0644866	-0.117295	0.181782
P16446	0.0644752	-0.0230853	-0.04139	0.125291	-0.127948	0.00265628	0.000340066	0.0348425	-0.0351825	-0.0352745	0.0825825	-0.047308	-0.0191889	0.0204517	-0.00126282
P16573	0.116235	0.249293	-0.365528	-0.0729217	0.163849	-0.0909273	0.00398262	0.0295953	-0.0335779	0.186946	0.192033	-0.378979	-0.0683814	0.0945197	-0.0261384
P16617	0.0148689	-0.0780447	0.0631758	-0.023346	-0.00336886	0.0267149	0.0595164	-0.0473476	-0.0121687	-0.00160743	0.0120312	-0.0104238	-0.0525992	-0.0168815	0.0694807
P16675	0.00973808	-0.0150559	0.00531778	0.210197	-0.251685	0.0414885	-0.0278945	0.159156	-0.131262	-0.115559	0.0469117	0.0686471	0.0154253	0.0289746	-0.0444
P16879	0.0966212	0.0873405	-0.183962	-0.210959	0.0768536	0.134106	0.0944616	-0.0143217	-0.0801399	NA	NA	NA	-0.0555169	0.0558687	-0.00035178
P17046	0.0108327	0.0103345	-0.0211672	-0.3075	0.315557	-0.00805737	0.165612	-0.106921	-0.0586903	0.0407899	-0.0836632	0.0428733	0.0339898	0.113245	-0.147235
P17077	-0.255378	0.049549	0.205829	-0.0586201	-0.0954815	0.154102	-0.264536	0.212503	0.0520329	-0.238901	0.0946377	0.144263	-0.101321	-0.0260498	0.127371
P17164	-0.0653901	-0.0129971	0.0783872	-0.0591153	0.09521	-0.0360948	-0.070895	0.00380254	0.0670924	0.00716039	0.0114908	-0.0186512	-0.103337	0.0876389	0.0156979
P17183	NA	NA	NA	NA	NA	NA	NA	NA	NA	NA	NA	NA	-0.147259	0.262475	-0.115216
P17225	0.038832	-0.09158	0.052748	NA	NA	NA	NA	NA	NA	NA	NA	NA	0.0319053	0.0392209	-0.0711263
P17256	0.00183996	0.0212207	-0.0230606	NA	NA	NA	NA	NA	NA	NA	NA	NA	NA	NA	NA
P17426	0.0107015	0.0418683	-0.0525698	-0.00701016	0.0530476	-0.0460375	NA	NA	NA	0.0284532	0.0121648	-0.040618	0.0785254	0.0340196	-0.112545
P17427	0.0259659	-0.0351732	0.00920732	0.0228815	-0.0417728	0.0188913	0.0375764	0.0849801	-0.122557	0.0479114	0.0886852	-0.136597	0.00294947	-0.0245155	0.021566
P17475	0.0637048	-0.144259	0.080554	0.000322083	0.0601602	-0.0604823	0.0497585	-0.0170688	-0.0326897	0.222597	0.0180152	-0.240612	0.165278	0.00300608	-0.168284
P17665	0.0269757	0.0485355	-0.0755111	-0.0335161	0.146495	-0.112979	0.00650258	0.120751	-0.127254	-0.16115	0.195612	-0.0344621	-0.0180979	0.0584625	-0.0403646
P17764	-0.0757615	0.000356771	0.0754047	0.0046295	0.052999	-0.0576285	-0.0922253	0.01001	0.0822153	-0.107026	0.0834137	0.0236119	0.0592571	-0.0230184	-0.0362387
P17955	NA	NA	NA	0.00215324	0.0163642	-0.0185174	NA	NA	NA	NA	NA	NA	NA	NA	NA
P18163	0.0428871	-0.00284721	-0.0400399	-0.0431831	0.0280407	0.0151424	0.089458	0.119432	-0.20889	-0.0401161	0.0647	-0.024584	-0.0859054	0.0437893	0.0421161
P18265	NA	NA	NA	-0.0898166	-0.184385	0.274202	NA	NA	NA	NA	NA	NA	NA	NA	NA
P18297	0.115713	-0.11666	0.000946616	-0.206511	0.365348	-0.158838	-0.00520139	0.0655072	-0.0603058	0.0389237	0.160909	-0.199833	0.180419	0.305207	-0.485627
P18298	-0.0934946	-0.0129772	0.106472	0.00130129	-0.103964	0.102663	NA	NA	NA	-0.170147	0.0515583	0.118589	8.57e-05	-0.0469447	0.046859
P18331	NA	NA	NA	-0.262094	0.132737	0.129356	NA	NA	NA	0.198211	-0.210506	0.0122956	0.209323	0.0961296	-0.305452
P18418	-0.161683	0.0750239	0.0866595	-0.0626677	0.0964789	-0.0338112	-0.0331207	-0.0935386	0.126659	-0.0453776	0.0306123	0.0147654	0.0046438	0.0186311	-0.0232749
P18420	0.00699539	-0.049729	0.0427336	0.0934064	-0.0915722	-0.00183419	-0.0382721	0.0463463	-0.00807413	-0.114378	0.0727585	0.0416199	-0.0399994	-0.0337132	0.0737126
P18422	NA	NA	NA	-0.0406445	-0.0672805	0.107925	-0.0554668	0.0239166	0.0315501	NA	NA	NA	NA	NA	NA
P18437	NA	NA	NA	NA	NA	NA	0.130308	-0.460739	0.330431	NA	NA	NA	NA	NA	NA
P18445	-0.0479768	0.00928191	0.0386948	0.11252	-0.275293	0.162773	-0.144926	0.0406592	0.104267	-0.242967	-0.0775225	0.32049	-0.0629199	0.0292028	0.0337171
P18596	-0.129843	0.108703	0.0211394	NA	NA	NA	0.0943214	-0.0860481	-0.00827327	-0.0174294	0.0669031	-0.0494737	0.0748562	-0.044942	-0.0299142
P18608	NA	NA	NA	0.23452	-0.49256	0.25804	NA	NA	NA	NA	NA	NA	NA	NA	NA
P18653	NA	NA	NA	NA	NA	NA	-0.0821629	-0.0389554	0.121118	NA	NA	NA	NA	NA	NA
P18654	0.145079	0.0303093	-0.175389	0.177647	-0.077886	-0.0997611	0.00541845	0.0301616	-0.03558	0.103398	0.0248431	-0.128241	-0.00496486	0.0525241	-0.0475592
P18687	NA	NA	NA	NA	NA	NA	-0.0326133	-0.0130288	0.0456422	-0.206081	0.115381	0.0907002	NA	NA	NA
P18708	0.0701345	0.0176157	-0.0877502	0.053765	0.019826	-0.073591	NA	NA	NA	-0.0307714	0.0981564	-0.067385	0.13607	-0.0443169	-0.0917531
P19139	0.0528574	-0.0214062	-0.0314512	-0.000234199	-0.0571845	0.0574187	0.0605439	-0.0308054	-0.0297384	0.0132324	-0.0742835	0.0610511	-0.0165609	-0.00520501	0.0217659
P19234	0.072593	0.0449446	-0.117538	NA	NA	NA	NA	NA	NA	NA	NA	NA	NA	NA	NA
P19253	-0.149639	-0.0241666	0.173806	0.00399177	-0.134579	0.130587	-0.207575	0.0620073	0.145567	-0.325451	0.0889815	0.23647	-0.104666	0.00670727	0.0979584
P19356	NA	NA	NA	0.0968355	0.169404	-0.26624	NA	NA	NA	-0.0199647	0.00377591	0.0161888	NA	NA	NA
P19511	-0.0107922	0.0311922	-0.0204	0.0890405	0.00894399	-0.0979845	-0.0466701	0.0840591	-0.037389	-0.1617	0.0824272	0.0792727	-0.00612262	-0.0164601	0.0225827
P19629	0.130768	-0.290767	0.159998	0.00418926	-0.133712	0.129523	-0.0826765	-0.0320927	0.114769	0.0656104	-0.183761	0.118151	-0.0784628	-0.101794	0.180257
P19804	-0.0739716	0.148867	-0.0748955	-0.0220693	0.034475	-0.0124057	-0.0647782	0.0117873	0.0529908	-0.133567	0.0191797	0.114388	0.0483349	0.0721272	-0.120462
P19945	-0.0657426	-0.0251521	0.0908946	-0.0163153	-0.0913151	0.10763	-0.162411	0.0919248	0.0704858	-0.269218	0.0422707	0.226947	-0.073362	-0.0105717	0.0839336
P19973	0.0959527	-0.0293516	-0.0666011	0.0537862	0.0290022	-0.0827884	0.0212457	-0.0035307	-0.017715	0.0416731	0.0288679	-0.0705409	-0.0902981	0.095229	-0.00493094
P20070	-0.0321255	-0.000152239	0.0322777	0.0789113	0.199215	-0.278126	NA	NA	NA	0.0381527	0.0395721	-0.0777248	0.0890927	0.0307251	-0.119818
P20291	0.0781476	0.068405	-0.146553	0.0534595	0.0379155	-0.0913751	0.0877658	0.0575323	-0.145298	0.124259	0.070257	-0.194516	0.0357151	0.0297359	-0.065451
P20411	0.008829	0.0348702	-0.0436992	-0.00937835	-0.015921	0.0252994	0.0148699	0.00911339	-0.0239833	0.143404	0.0137195	-0.157124	-0.0148874	0.0176398	-0.00275232
P20417	-0.0725921	0.234473	-0.161881	0.0584477	-0.0223113	-0.0361364	NA	NA	NA	NA	NA	NA	-0.111873	0.0362503	0.075623
P20673	0.142021	-0.171382	0.0293619	0.0653993	-0.0618711	-0.00352816	0.0198935	0.0920186	-0.111912	0.00833414	0.186429	-0.194763	0.053296	0.0181542	-0.0714502
P20788	0.0303782	0.0420348	-0.072413	0.144298	0.0112932	-0.155591	NA	NA	NA	-0.1152	0.133671	-0.0184713	-0.00161362	0.0218616	-0.0202479
P21107	-0.118196	-0.0644568	0.182653	-0.0802698	0.0693118	0.010958	-0.0410003	-0.0126108	0.0536111	NA	NA	NA	NA	NA	NA
P21279	-0.130924	0.203314	-0.0723895	-0.224093	0.325585	-0.101493	0.0362828	0.00160126	-0.0378841	NA	NA	NA	NA	NA	NA
P21531	-0.110805	-0.0394091	0.150214	0.0228581	-0.128782	0.105924	-0.230325	0.101164	0.129161	-0.261808	0.115884	0.145924	-0.0504069	-0.0412874	0.0916942
P21533	-0.104016	-0.0308088	0.134825	0.0238697	-0.210322	0.186453	-0.200902	0.082907	0.117995	-0.280404	0.030776	0.249628	-0.112873	-0.0465923	0.159465
P21571	-0.0852904	0.104711	-0.0194207	NA	NA	NA	0.0153379	0.199276	-0.214614	NA	NA	NA	0.0182572	-0.0542308	0.0359736
P21619	0.00679086	0.0326502	-0.039441	0.126236	-0.106818	-0.0194187	0.0635824	-0.0675654	0.00398301	-0.0156342	0.0271829	-0.0115487	0.0701193	-0.00895439	-0.0611649
P21670	0.0408693	-0.0481676	0.00729827	0.0276445	-0.0376451	0.0100007	-0.031424	0.0289986	0.0024254	-0.0443982	0.01452	0.0298782	0.000565733	-0.0632412	0.0626755
P21708	0.0442359	-0.0343087	-0.0099272	-0.128611	0.0949084	0.0337023	0.0179467	-0.0493309	0.0313843	0.0453483	0.036398	-0.0817463	0.0121923	-0.0313558	0.0191635
P21913	-0.0231883	-0.0100986	0.0332869	0.130585	-0.161307	0.0307225	NA	NA	NA	-0.201611	0.0831598	0.118451	0.0182998	-0.00832267	-0.00997711
P21961	NA	NA	NA	NA	NA	NA	NA	NA	NA	1.2145	-0.73496	-0.47954	1.84035	-1.2157	-0.79832
P22062	0.0202645	-0.0260933	0.00582886	-0.0262237	0.090493	-0.0642693	0.0117348	0.0359557	-0.0476905	-0.0190754	0.0881033	-0.0690279	-0.0590502	0.175964	-0.116914
P22509	0.0339392	-0.0295462	-0.00439304	0.057164	-0.0942035	0.0370395	-0.105922	0.152554	-0.0466317	-0.165921	0.0351799	0.130741	0.0919311	-0.137238	0.0453073
P22682	0.0616334	0.0402267	-0.10186	-0.0405019	0.0351094	0.00539248	0.0657147	-0.0905889	0.0248742	0.0711317	-0.0728076	0.00167594	-0.118827	0.0892993	0.0295275
P22734	-0.00912135	-0.0160983	0.0252197	-0.1011	-0.0489399	0.15004	-0.0604269	0.0298622	0.0305647	0.0730192	0.0286839	-0.101703	-0.0945965	0.0135856	0.0810109
P22892	0.048223	-0.0337084	-0.0145146	0.0422271	-0.0705147	0.0282876	0.00893391	0.00200364	-0.0104366	0.0742805	-0.0578325	-0.016448	-0.020135	0.00402452	0.0214806
P22985	0.0662284	-0.00113201	-0.0650964	0.0652911	-0.0185864	-0.0467047	0.0756637	-0.00933774	-0.0663259	0.019082	0.0215519	-0.0406339	0.0231119	0.0109423	-0.0340542
P23198	0.0106381	-0.0474801	0.0368419	0.0565333	-0.031933	-0.0246003	0.0252506	0.0388156	-0.0640663	-0.0741672	0.0318608	0.0423063	0.00240449	-0.19134	0.188935
P23249	NA	NA	NA	NA	NA	NA	NA	NA	NA	0.425009	-0.306722	-0.118287	0.364935	-0.0289435	-0.335991
P23358	-0.101381	-0.0271696	0.128551	-0.0136075	-0.0659288	0.0795363	-0.182473	0.0346366	0.147837	-0.297298	-0.00695965	0.304258	-0.087386	-0.0309518	0.118338
P23514	-0.00886564	0.0539464	-0.0450808	-0.131319	0.0529533	0.0783657	-0.016722	0.0331809	-0.0164589	-0.0547056	-0.0120259	0.0667315	-0.0476696	-0.0339604	0.08163
P23562	-0.603669	0.423203	0.180466	-0.161845	0.870589	-0.708744	-0.131287	0.635613	-0.504326	0.930049	0.229711	-1.15976	1.09135	0.301202	-1.39255
P23591	0.112976	-0.0422299	-0.0707456	0.0125055	0.0615748	-0.0740803	-0.00444777	0.00730045	-0.00285267	NA	NA	NA	0.146393	0.0249658	-0.171359
P23640	0.0437678	-0.00798976	-0.035778	0.0136212	0.0584537	-0.0720749	0.0740306	-0.0918323	0.0178017	0.0780992	-0.0218333	-0.056266	-0.0310023	0.0205723	0.01043
P23780	0.0776259	-0.0606394	-0.0169865	NA	NA	NA	0.045284	0.0955938	-0.140878	0.0419087	0.0232265	-0.0651353	-0.0139724	-0.0127458	0.0267183
P23800	NA	NA	NA	NA	NA	NA	NA	NA	NA	NA	NA	NA	0.0847196	-0.105221	0.0205017
P23965	NA	NA	NA	0.235375	-0.0848031	-0.150572	NA	NA	NA	NA	NA	NA	NA	NA	NA
P24049	-0.186647	0.00442972	0.182217	-0.0964923	-0.0708294	0.167322	-0.277556	0.144971	0.132585	-0.29341	0.0814125	0.211997	-0.0825938	0.0120804	0.0705135
P24050	-0.137415	-0.0629915	0.200406	0.0628465	-0.114678	0.0518319	-0.276109	0.145003	0.131106	-0.13477	0.0190408	0.115729	-0.0347268	0.0320165	0.0027103
P24063	0.0156489	0.0928968	-0.108546	0.139498	-0.119313	-0.0201849	-0.0593305	0.0676706	-0.00834016	-0.0352033	0.115516	-0.0803131	-0.0512931	0.156809	-0.105516
P24135	0.0271453	-0.0661435	0.0389982	0.0906575	-0.0265505	-0.064107	0.0750502	-0.0997222	0.024672	0.0470949	-0.0104319	-0.0366631	0.0781402	-0.0806518	0.00251158
P24155	0.0440976	0.0241289	-0.0682265	-0.0244289	0.0460896	-0.0216606	-0.0152828	-0.0113412	0.026624	-0.079622	0.0175217	0.0621003	0.0762319	-0.0305143	-0.0457177
P24268	-0.158117	-0.0587369	0.216854	-0.010165	-0.0435442	0.0537092	-0.194918	0.103023	0.0918949	-0.172094	-0.0564557	0.22855	-0.206575	-0.0165204	0.223095
P24368	-0.0372381	0.0295331	0.00770506	0.0140169	-0.0560303	0.0420134	-0.0829624	0.0162385	0.0667239	-0.11533	0.00296311	0.112367	-0.0465506	-0.0073304	0.0538811
P24527	-0.0132915	-0.00919508	0.0224866	-0.0495001	0.326659	-0.277159	-0.020524	0.266713	-0.246189	0.0660866	0.298447	-0.364533	0.0317427	0.116669	-0.148412
P24668	NA	NA	NA	NA	NA	NA	NA	NA	NA	-0.0342921	0.150873	-0.116581	NA	NA	NA
P25086	0.0565673	0.127204	-0.183772	-0.16089	0.05694	0.10395	0.0196134	-0.00224939	-0.017364	0.0281504	0.0739029	-0.102053	NA	NA	NA
P25093	0.0777642	-0.0514623	-0.026302	-0.031275	-0.0435767	0.0748517	0.0590107	-0.0740209	0.0150102	0.0804524	0.0333903	-0.113843	-0.00568893	-0.0971346	0.102824
P25114	-0.185705	0.0806353	0.10507	0.0344885	-0.0918727	0.0573842	0.0714721	-0.0836955	0.0122234	0.0788874	-0.0766994	-0.00218802	-0.0990558	0.0255125	0.0735433
P25206	-0.105018	-0.00912063	0.114139	-0.0779224	-0.000600067	0.0785225	-0.0567924	-0.0642697	0.121062	-0.258906	0.161024	0.0978829	-0.116246	0.0494024	0.066844
P25235	-0.0490347	0.1242	-0.0751657	-0.082132	0.0497023	0.0324297	0.0210378	-0.0393949	0.0183572	-0.110456	0.0337978	0.0766584	-0.0459738	0.00728037	0.0386935
P25286	0.0776311	-0.035389	-0.0422422	0.100364	-0.0211024	-0.0792619	0.157477	-0.129082	-0.0283949	0.13646	-0.0281457	-0.108315	0.0995803	-0.0351024	-0.0644779
P25444	-0.128839	0.00825773	0.120581	-0.000906486	-0.148505	0.149412	-0.192165	0.0685476	0.123618	-0.291521	0.0297729	0.261748	-0.0889927	-0.05181	0.140803
P25799	0.00181441	-0.0224572	0.0206427	NA	NA	NA	0.150833	-0.0148877	-0.135945	NA	NA	NA	0.0214941	-0.0379087	0.0164146
P25886	0.0482676	-0.139234	0.0909663	0.0365655	-0.153911	0.117345	-0.101397	-0.0345505	0.135948	-0.181242	0.020118	0.161124	-0.081261	-0.0455067	0.126768
P26039	0.0175016	-0.00519771	-0.0123039	0.00925272	0.0191455	-0.0283982	-0.00983782	-0.0146516	0.0247226	0.00541224	-0.00022108	-0.00519116	-0.00922801	-0.0074153	0.0166433
P26043	NA	NA	NA	NA	NA	NA	0.0756271	-0.243287	0.16766	NA	NA	NA	NA	NA	NA
P26051	0.0460806	0.0125617	-0.0586423	0.22669	-0.101439	-0.125252	0.0763342	0.030596	-0.10693	0.0604885	0.100616	-0.161105	-0.0311914	0.133267	-0.102076
P26284	0.0800003	0.0715637	-0.151564	0.0637832	0.0686831	-0.132466	0.0156952	0.0824695	-0.0981647	0.074632	-0.0327296	-0.0419024	-0.0611946	0.0445884	0.0166062
P26369	0.078067	-0.0151394	-0.0629275	0.0092215	0.00137618	-0.0105977	-0.00569159	0.136817	-0.131125	-0.128234	0.0539645	0.0742699	0.0620006	-0.00345559	-0.058545
P26453	-0.190192	0.1043	0.0858924	-0.146681	0.164382	-0.0177013	NA	NA	NA	0.0108719	0.029464	-0.0403359	NA	NA	NA
P26516	-0.0426126	0.0898705	-0.0472579	0.0526989	0.0437898	-0.0964887	-0.0189718	0.160334	-0.141363	-0.0360515	0.0119141	0.0241374	0.0131856	0.137046	-0.150231
P26772	0.0404347	0.040406	-0.0808408	0.0305045	0.0282125	-0.058717	-0.0829484	0.114934	-0.0319852	-0.237919	0.0977125	0.140207	-0.0192927	-0.0323852	0.0516779
P26817	-0.0411519	-0.0319796	0.0731315	0.0018642	-0.023506	0.0216418	0.0542346	-0.110085	0.0558506	0.0536825	-0.0524588	-0.00122361	0.0544256	-0.0294392	-0.0249864
P27046	NA	NA	NA	0.028004	-0.064086	0.036082	NA	NA	NA	NA	NA	NA	NA	NA	NA
P27048	0.124888	0.0482421	-0.17313	-0.0373373	-0.0295584	0.0668957	-0.0962998	0.134999	-0.0386992	-0.13216	-0.025274	0.157434	0.000556326	-0.0483776	0.0478213
P27321	-0.00240937	0.018715	-0.0163057	0.0750667	-0.0673308	-0.0077359	0.0613748	-0.138529	0.077154	0.0607275	-0.0528337	-0.00789375	-0.00217599	0.0102465	-0.00807052
P27601	0.110036	0.0920112	-0.202047	NA	NA	NA	0.0704129	0.141549	-0.211962	-0.0273367	0.0605263	-0.0331896	0.039342	0.00775902	-0.0471011
P27612	NA	NA	NA	NA	NA	NA	NA	NA	NA	-0.00543352	0.0669134	-0.0614799	NA	NA	NA
P27615	NA	NA	NA	0.0629425	0.0771354	-0.140078	NA	NA	NA	NA	NA	NA	NA	NA	NA
P27645	NA	NA	NA	NA	NA	NA	NA	NA	NA	0.243179	-0.246058	0.00287847	NA	NA	NA
P27653	-0.0863787	0.0398705	0.0465081	-0.166028	0.126834	0.0391946	-0.0627395	0.0872979	-0.0245585	-0.0237825	0.107516	-0.0837334	0.0259217	-0.0365426	0.0106209
P27661	0.18641	-0.165246	-0.0211643	0.174961	-0.0756685	-0.0992923	NA	NA	NA	-0.0387268	0.0236811	0.0150457	NA	NA	NA
P27867	0.0183493	-0.0731112	0.0547619	0.0188398	-0.0301949	0.0113551	0.0101307	0.0207223	-0.030853	0.108041	0.000164228	-0.108206	-0.0276826	0.0715682	-0.0438856
P27881	-0.0324173	-0.00327055	0.0356879	0.1261	-0.2212	0.0950998	0.00145416	-0.0125744	0.0111203	0.00398974	-0.0236711	0.0196813	-0.0200686	-0.0265138	0.0465824
P27926	0.0823351	-0.0379791	-0.044356	-0.0153916	0.0660066	-0.0506151	0.0875817	0.0239252	-0.111507	0.0878776	-0.00534181	-0.0825358	-0.0180555	0.0946127	-0.0765572
P28023	0.0672679	-0.0993629	0.0320951	0.0729464	-0.0214402	-0.0515062	0.110571	-0.0152648	-0.0953063	0.0360338	-0.11421	0.0781765	-0.017714	0.0341597	-0.0164458
P28064	0.0468056	-0.0347927	-0.0120129	0.0222939	-0.0185012	-0.00379273	-0.0737025	0.0696841	0.00401841	-0.0226046	0.0877086	-0.065104	-0.00642576	-0.0220872	0.0285129
P28073	NA	NA	NA	-0.0913597	0.0402606	0.0510991	NA	NA	NA	-0.0628563	0.0363003	0.026556	NA	NA	NA
P28077	0.0411005	0.0359669	-0.0770674	0.00983471	0.0257388	-0.0355735	-0.0791072	0.379677	-0.30057	0.0245943	0.00687906	-0.0314734	0.0944019	-0.0492099	-0.045192
P28293	0.0563459	-0.0859536	0.0296077	-0.226555	0.319494	-0.0929391	-0.144763	0.327613	-0.182849	0.319863	-0.0180053	-0.301858	0.00209492	0.357916	-0.360011
P28480	0.0101835	-0.00918234	-0.00100118	0.0136613	0.00645987	-0.0201211	-0.112842	0.075558	0.0372836	-0.081363	0.0558726	0.0254904	0.0411022	-0.0410276	-7.45e-05
P28494	0.162771	-0.148751	-0.0140193	NA	NA	NA	NA	NA	NA	NA	NA	NA	0.121192	-0.102643	-0.0185495
P28648	0.106054	-0.0708789	-0.0351754	0.0320156	0.181696	-0.213712	0.00474133	0.104905	-0.109647	NA	NA	NA	NA	NA	NA
P28656	-0.0976269	-0.00462268	0.10225	-0.083268	0.0634302	0.0198379	-0.120324	0.0958263	0.0244973	-0.103516	0.0140779	0.0894382	-0.0103959	-0.0114513	0.0218472
P28740	NA	NA	NA	NA	NA	NA	NA	NA	NA	-0.0658957	0.0885588	-0.0226631	0.0972854	-0.0414901	-0.0557953
P28843	NA	NA	NA	-0.0892334	0.111481	-0.0222476	0.111613	0.0328696	-0.144483	-0.0486914	0.111759	-0.0630674	NA	NA	NA
P29066	-0.0478472	-0.035032	0.0828792	0.0803264	-0.145048	0.0647217	-0.0173295	0.0551618	-0.0378323	0.0185959	0.0640438	-0.0826397	0.0409519	0.12104	-0.161992
P29067	-0.178931	0.0404129	0.138518	-0.091665	0.0468881	0.044777	0.0453029	-0.123484	0.0781806	0.00859079	-0.0172127	0.00862193	-0.0206164	0.012528	0.00808835
P29117	-0.288224	0.360534	-0.0723105	NA	NA	NA	NA	NA	NA	-0.239719	0.274263	-0.0345448	NA	NA	NA
P29147	0.0824286	0.0152438	-0.0976725	0.0978008	-0.103495	0.00569384	NA	NA	NA	NA	NA	NA	NA	NA	NA
P29315	-0.0103561	0.0274955	-0.0171394	0.0185759	-0.020562	0.0019861	-0.0223857	0.0270467	-0.00466097	-0.122267	0.0612756	0.0609918	-0.0610082	0.0165851	0.0444231
P29341	-0.0945738	-0.030177	0.124751	-0.0315202	-0.0705022	0.102022	-0.111943	0.0200103	0.0919329	-0.164932	-0.00500792	0.16994	-0.0772787	-0.0274947	0.104773
P29351	NA	NA	NA	-0.0099982	0.00964507	0.000353135	NA	NA	NA	0.0274336	0.0170968	-0.0445304	0.124926	0.0542829	-0.179209
P29410	-0.024469	0.0346366	-0.0101676	-0.0468271	0.0327951	0.014032	-0.00221116	-0.0376524	0.0398636	0.0181914	-0.00188532	-0.0163061	-0.00890369	-0.017507	0.0264107
P29419	-0.057643	0.112526	-0.0548826	NA	NA	NA	NA	NA	NA	-0.204288	0.126703	0.0775851	-0.00987904	-0.0286201	0.0384991
P29595	NA	NA	NA	-0.153698	-0.0418168	0.195515	NA	NA	NA	0.0359774	-0.195674	0.159696	NA	NA	NA
P30009	0.0328759	0.289276	-0.322152	0.139515	0.0302897	-0.169804	0.0828808	-0.228249	0.145368	NA	NA	NA	NA	NA	NA
P30152	-0.0457929	-0.172921	0.218714	-0.289578	0.0800999	0.209479	0.0423566	-0.245015	0.202658	0.130928	-0.264638	0.13371	-0.123774	-0.0632994	0.187074
P30349	0.0317828	-0.022283	-0.00949975	-0.074325	0.223647	-0.149322	0.00115293	0.11506	-0.116213	0.0140389	0.203824	-0.217863	0.0949646	-0.000918279	-0.0940463
P30427	-0.0136657	0.0515914	-0.0379258	0.121213	-0.166881	0.0456683	0.0377772	0.0598406	-0.0976178	-0.150561	0.134312	0.0162489	0.0323374	-0.041686	0.00934857
P30742	-0.0693452	-0.0183442	0.0876895	-0.00548162	-0.207644	0.213125	-0.219057	0.119636	0.099421	-0.285479	0.035738	0.249741	-0.0436517	-0.0183652	0.0620169
P30835	NA	NA	NA	NA	NA	NA	NA	NA	NA	0.0283178	-0.0322004	0.00388258	0.0133031	-0.00883792	-0.00446516
P30839	-0.003783	-0.00961717	0.0134002	-0.0361385	-0.0176989	0.0538374	0.0611828	-0.0106184	-0.0505644	0.0416892	0.0233814	-0.0650705	0.0900699	0.00585423	-0.0959242
P30904	NA	NA	NA	-0.0227548	0.180106	-0.157351	-0.304218	0.651597	-0.347379	NA	NA	NA	0.0133721	0.240164	-0.253536
P30919	NA	NA	NA	NA	NA	NA	-0.0223891	0.0834894	-0.0611003	NA	NA	NA	NA	NA	NA
P31000	-0.0131371	0.0392663	-0.0261293	0.0189337	-0.00425945	-0.0146743	0.0381582	-0.0067995	-0.0313587	-0.0642516	0.069772	-0.00552046	-0.0560753	-0.00374729	0.0598225
P31044	-0.0123471	-0.00197235	0.0143194	0.0133507	-0.0310516	0.0177009	-0.134188	0.071258	0.0629297	-0.105539	-0.0223771	0.127916	0.081813	-0.0238632	-0.0579497
P31230	-0.0152643	-0.162331	0.177596	0.0140786	0.0556375	-0.069716	NA	NA	NA	-0.0753115	0.0476624	0.027649	0.0383408	-0.0493782	0.0110374
P31399	0.0273078	0.0818584	-0.109166	0.0304201	0.0265381	-0.0569581	-0.0187336	0.0738581	-0.0551245	-0.18717	0.143482	0.0436877	-0.00948532	0.0388758	-0.0293905
P31721	NA	NA	NA	-0.251494	0.177052	0.0744424	NA	NA	NA	NA	NA	NA	NA	NA	NA
P31938	-0.0347292	0.0320529	0.0026763	0.00411502	-0.0765411	0.0724261	-0.0345678	0.0330973	0.0014705	-0.0716802	0.0362876	0.0353926	-0.027303	0.0423684	-0.0150654
P31977	0.0285097	0.0363875	-0.0648972	0.00518697	-0.0282367	0.0230497	0.0309049	0.0154067	-0.0463117	-0.0539613	0.0338625	0.0200988	-0.0215188	-0.0120855	0.0336043
P32551	-0.0597221	0.0694782	-0.00975609	0.105596	-0.000365857	-0.105231	-0.100876	0.105667	-0.00479011	-0.183859	0.0799894	0.10387	-0.0529465	0.0407664	0.0121801
P32577	0.0589795	0.0413869	-0.100366	0.121924	-0.0765666	-0.0453576	0.00833513	0.0555625	-0.0638976	-0.00785066	-0.0062614	0.0141121	0.0360103	-0.0313569	-0.0046534
P32883	NA	NA	NA	-0.0780921	0.0317553	0.0463368	NA	NA	NA	NA	NA	NA	NA	NA	NA
P32921	NA	NA	NA	NA	NA	NA	NA	NA	NA	NA	NA	NA	-0.00120216	-0.0129411	0.0141433
P34022	-0.0089125	-0.046244	0.0551565	-0.0215224	-0.0782348	0.0997572	-0.0611018	0.0219036	0.0391982	-0.052263	0.0763566	-0.0240936	-0.0468024	-0.0102291	0.0570315
P34067	NA	NA	NA	NA	NA	NA	NA	NA	NA	NA	NA	NA	-0.0355492	0.00606414	0.0294851
P35171	0.0224683	0.0231599	-0.0456282	0.0146533	0.0268221	-0.0414754	NA	NA	NA	-0.0485312	0.131391	-0.0828601	NA	NA	NA
P35213	0.0302634	-0.0474835	0.0172201	-0.0097463	0.00747213	0.00227417	0.0655626	-0.0360665	-0.0294961	-0.0390489	0.0116492	0.0273997	0.0602937	-0.0368063	-0.0234874
P35278	0.0348123	-0.0538894	0.0190771	-0.0141147	-0.0113271	0.0254419	0.0397942	0.00439205	-0.0441862	-0.00657658	-0.111191	0.117768	0.0114905	-0.0776438	0.0661533
P35279	0.0585192	0.00405361	-0.0625728	-0.0230332	0.0555358	-0.0325026	0.0257014	-0.000447795	-0.0252536	0.021365	0.0208837	-0.0422487	-0.00465442	-0.036675	0.0413294
P35282	0.0832986	-0.00287219	-0.0804264	0.06754	-0.000624313	-0.0669157	0.130539	0.0936661	-0.224205	0.107508	-0.0203222	-0.0871863	0.132942	-0.113712	-0.0192295
P35290	0.164415	0.0513507	-0.215766	NA	NA	NA	NA	NA	NA	NA	NA	NA	NA	NA	NA
P35293	0.130644	0.042556	-0.1732	-0.0197257	0.0181863	0.0015394	0.0643702	-0.140254	0.0758839	0.21071	-0.146311	-0.0643986	-0.0213069	-0.0607529	0.0820598
P35407	-0.0364594	0.0477112	-0.0112518	NA	NA	NA	0.0340293	-0.0435492	0.0095199	0.233338	-0.0861424	-0.147196	0.070699	-0.153679	0.08298
P35434	-0.0108898	0.118024	-0.107134	0.108701	-0.00346984	-0.105231	-0.0562421	0.0474385	0.00880362	-0.200451	0.181337	0.0191146	-0.0360271	0.00377987	0.0322472
P35435	-0.0071965	0.0530231	-0.0458266	0.140885	-0.0260438	-0.114842	-0.0191779	0.0323871	-0.0132092	-0.173387	0.0785391	0.0948482	-0.0248808	0.00726039	0.0176204
P35441	-0.697405	0.725915	-0.0285092	NA	NA	NA	NA	NA	NA	-0.0955943	0.232057	-0.136463	0.0675419	-0.0398394	-0.0277025
P35559	NA	NA	NA	-0.0826127	-0.0189748	0.101588	-0.152141	0.113729	0.038412	-0.143927	0.105	0.0389276	0.0868736	-0.0761999	-0.0106738
P35565	-0.0825774	0.0711871	0.0113903	0.0396761	0.00240254	-0.0420787	0.0184542	0.0087707	-0.0272249	-0.0798783	0.0702104	0.00966785	-0.0626247	0.0283084	0.0343163
P35571	-0.0204537	0.0225123	-0.00205852	-0.327737	0.19589	0.131847	0.00962164	-0.0398409	0.0302192	0.0787296	0.02144	-0.10017	-0.0518978	0.0497882	0.0021096
P35585	0.0053939	-0.0339215	0.0285276	0.00779252	-0.0309739	0.0231813	-0.0155574	0.0478744	-0.032317	-0.0312108	0.0283173	0.00289352	-0.0032894	-0.0348575	0.0381469
P35704	-0.0392021	0.0983818	-0.0591797	0.189446	-0.25303	0.0635844	-0.0753518	0.154804	-0.079452	-0.0895048	0.0117835	0.0777213	0.169095	-0.181917	0.0128221
P35815	0.0950447	0.00647021	-0.101515	-0.0480311	0.10746	-0.0594291	NA	NA	NA	NA	NA	NA	0.115936	-0.0201998	-0.0957365
P35831	0.0224371	0.0781581	-0.100595	NA	NA	NA	NA	NA	NA	0.0787267	-0.102878	0.0241508	NA	NA	NA
P35991	0.0168247	-0.098954	0.0821293	0.0310468	-0.0383095	0.00726273	-0.0655532	0.00142399	0.0641292	NA	NA	NA	0.0328546	-0.0811653	0.0483107
P36370	0.00910061	-0.00157737	-0.00752325	0.0686233	-0.0345353	-0.034088	0.15212	0.0687147	-0.220834	0.0807964	-0.114295	0.0334983	0.124215	-0.0395852	-0.0846294
P36372	NA	NA	NA	0.136694	-0.0756084	-0.0610855	0.123724	0.0486181	-0.172342	0.0923525	-0.111287	0.0189341	0.0607435	0.00045774	-0.0612013
P36423	-0.106078	0.148635	-0.0425575	0.00478341	0.0693665	-0.0741499	0.0167202	0.0960694	-0.11279	NA	NA	NA	NA	NA	NA
P36506	NA	NA	NA	NA	NA	NA	NA	NA	NA	0.034703	0.0555458	-0.0902489	NA	NA	NA
P36552	NA	NA	NA	-0.0421917	0.0425172	-0.000325514	NA	NA	NA	-0.077506	0.117564	-0.0400581	NA	NA	NA
P36860	0.017334	-0.0200258	0.00269181	0.0554095	0.0804332	-0.135843	0.0740226	0.0127908	-0.0868134	0.155425	-0.0485147	-0.10691	0.027266	-0.0328381	0.0055721
P36876	0.0924914	-0.0649892	-0.0275022	-0.0552123	0.0141926	0.0410196	-0.0117315	0.0682506	-0.0565191	-0.0135862	0.00203632	0.0115499	0.0153539	0.0599569	-0.0753108
P36972	-0.00231566	-0.0357856	0.0381012	-0.0606115	0.0922516	-0.0316401	0.00956709	0.0142192	-0.0237863	0.0337277	-0.0251085	-0.00861916	-0.0392564	0.0190494	0.020207
P37199	0.0565924	-0.0182956	-0.0382968	0.201715	-0.0225228	-0.179192	0.0576381	0.0391566	-0.0967947	-0.0867258	0.0200142	0.0667116	NA	NA	NA
P37285	NA	NA	NA	NA	NA	NA	NA	NA	NA	0.0667372	-0.111032	0.0442943	NA	NA	NA
P37879	NA	NA	NA	NA	NA	NA	-0.0855601	0.0499591	0.035601	NA	NA	NA	NA	NA	NA
P37996	NA	NA	NA	NA	NA	NA	-0.00658821	0.181226	-0.174638	0.0394422	-0.135306	0.0958641	0.026391	0.0238142	-0.0502052
P38403	NA	NA	NA	NA	NA	NA	NA	NA	NA	NA	NA	NA	-0.0753056	0.103225	-0.0279195
P38650	0.105547	-0.0440487	-0.0614981	NA	NA	NA	0.0482811	0.0520474	-0.100328	0.0501834	-0.015102	-0.0350814	NA	NA	NA
P38652	NA	NA	NA	-0.0106314	0.00819775	0.00243368	NA	NA	NA	NA	NA	NA	NA	NA	NA
P38656	-0.0518594	0.0104501	0.0414093	0.0309096	-0.154242	0.123332	-0.0232795	0.0254837	-0.00220416	-0.232306	0.0946538	0.137652	0.0258136	-0.0721816	0.0463679
P38659	-0.209959	0.0701349	0.139824	-0.0292468	-0.0127125	0.0419593	-0.0744172	-0.0212169	0.0956341	-0.0564687	0.0066172	0.0498515	-0.00858744	-0.0610212	0.0696086
P38718	0.141965	0.0467839	-0.188749	NA	NA	NA	NA	NA	NA	-0.0402175	0.0359909	0.00422658	NA	NA	NA
P39032	-0.102464	-0.0448611	0.147325	-4.7e-05	-0.113884	0.113931	NA	NA	NA	-0.24815	0.075849	0.172301	-0.0425471	0.0236233	0.0189238
P39052	0.0432482	-0.00395309	-0.0392951	0.0129911	0.037369	-0.0503601	0.043177	0.0483331	-0.0915101	0.0173039	0.040262	-0.0575659	0.0203023	0.00129173	-0.0215941
P40112	0.0675545	-0.0266691	-0.0408854	-0.0820858	-0.0284538	0.11054	0.0246561	-0.0185125	-0.00614356	-0.116163	0.00118365	0.114979	0.0242835	-0.0569065	0.0326231
P40241	0.024766	0.083174	-0.10794	0.0308848	0.157958	-0.188843	0.0782544	0.163465	-0.24172	-0.156401	0.475797	-0.319396	-0.0680586	0.173642	-0.105583
P40307	0.0536586	-0.0229268	-0.0307319	-0.0253609	0.029953	-0.0045921	-0.0494376	0.197184	-0.147746	-0.0547792	0.018364	0.0364152	-0.0417437	0.0563887	-0.014645
P40329	0.0152691	-0.019205	0.00393587	-0.0124957	0.0148255	-0.00232981	-0.0121039	0.0310049	-0.0189011	-0.0817492	0.0487259	0.0330233	0.0231947	0.0108187	-0.0340134
P40615	0.166785	-0.0957903	-0.0709952	0.100657	0.0162528	-0.11691	NA	NA	NA	-0.151889	0.0848046	0.0670844	0.0762344	-0.0106756	-0.0655588
P41105	-0.0979739	-0.0460212	0.143995	-0.0513391	-0.113911	0.165251	-0.232095	0.0757377	0.156357	-0.283696	0.101997	0.181699	-0.0347743	-0.0624116	0.0971859
P41123	-0.101853	-0.0296206	0.131473	0.0108145	-0.180626	0.169812	-0.260336	0.0803291	0.180007	-0.180259	0.0310693	0.149189	-0.0604394	-0.0247891	0.0852284
P41498	0.030334	0.05775	-0.0880841	0.0974497	-0.0691826	-0.0282671	-0.0940483	0.0228606	0.0711877	-0.0105131	0.0248521	-0.014339	0.000783034	0.0489621	-0.0497451
P41542	0.00992754	-0.0504578	0.0405302	-0.0481035	-0.00491317	0.0530167	-0.0214284	0.0107808	0.0106477	0.0509525	-0.00385608	-0.0470964	-0.0350889	0.0733792	-0.0382904
P41562	0.0390073	-0.0231666	-0.0158407	0.180226	-0.292979	0.112753	-0.0623818	0.140893	-0.0785116	NA	NA	NA	NA	NA	NA
P42128	NA	NA	NA	NA	NA	NA	NA	NA	NA	NA	NA	NA	-0.0264635	-0.0511224	0.0775859
P42208	0.0305687	0.0242732	-0.054842	NA	NA	NA	0.000922914	0.0645694	-0.0654923	-0.234498	0.124517	0.109981	-0.102866	-0.0979839	0.200849
P42225	-0.016291	-0.0443134	0.0606044	0.104341	-0.153338	0.0489975	0.0632431	-0.123471	0.0602281	0.0270119	-0.153049	0.126037	-0.0311636	-0.0627964	0.09396
P42227	NA	NA	NA	NA	NA	NA	NA	NA	NA	NA	NA	NA	-0.00671686	0.00635525	0.000361608
P42232	NA	NA	NA	NA	NA	NA	NA	NA	NA	0.0964055	0.0196381	-0.116044	NA	NA	NA
P42567	0.0689217	0.0633715	-0.132293	-0.0217028	0.0601355	-0.0384327	0.0479983	-0.0672697	0.0192714	-0.0163513	0.0997009	-0.0833496	-0.0655872	0.014237	0.0513502
P42667	0.12696	-0.0334704	-0.0934897	0.0453759	0.0458644	-0.0912403	0.0723581	-0.0127641	-0.059594	-0.05573	0.0130013	0.0427287	0.0873806	-0.00372109	-0.0836595
P42669	NA	NA	NA	NA	NA	NA	NA	NA	NA	-0.0455661	0.0234128	0.0221533	NA	NA	NA
P42676	0.0466023	0.0291261	-0.0757284	0.0579685	0.0237898	-0.0817583	NA	NA	NA	-0.144538	0.140146	0.004392	0.0159663	0.035614	-0.0515803
P42932	-0.000556162	-0.0342663	0.0348224	0.0114758	-0.0111717	-0.000304118	-0.0615821	0.0696005	-0.00801846	-0.0853041	0.0531893	0.0321148	-0.00874354	-0.0153285	0.0240721
P43138	0.153246	-0.0911967	-0.0620498	0.103922	-0.00404748	-0.0998743	0.00426102	0.0537976	-0.0580586	0.0385091	-0.00106908	-0.03744	NA	NA	NA
P43275	0.0511343	-0.0117915	-0.0393428	NA	NA	NA	0.00938357	0.0399577	-0.0493413	-0.0966464	0.0498184	0.046828	0.0271879	-0.0771721	0.0499842
P43278	0.32418	-0.149257	-0.174924	0.137938	-0.126164	-0.0117742	-0.0056776	0.0711474	-0.0654698	-0.298037	0.227798	0.0702386	0.07404	-0.0255909	-0.0484491
P43527	-0.0899311	0.0408467	0.0490844	-0.0798622	0.0800351	-0.000172914	-0.0287172	-0.0292213	0.0579385	-0.079881	0.0125682	0.0673128	-0.0962741	0.0372134	0.0590608
P45479	-0.259528	0.0733182	0.186209	-0.185949	0.080382	0.105567	-0.178851	0.0524598	0.126391	-0.170411	-0.00571127	0.176122	NA	NA	NA
P45592	0.224562	-0.0944593	-0.130103	-0.0076919	0.0227034	-0.0150115	0.0101146	0.132359	-0.142474	-0.0640905	0.13167	-0.0675796	0.0869929	0.000208832	-0.0872018
P45878	-0.0542929	0.140656	-0.0863629	-0.273688	0.0521821	0.221505	NA	NA	NA	-0.0474664	-0.0141581	0.0616245	-0.0733632	-0.00292965	0.0762929
P45953	NA	NA	NA	NA	NA	NA	NA	NA	NA	-0.06316	0.0797831	-0.0166231	NA	NA	NA
P46061	-0.0058381	-0.0410064	0.0468445	0.00480432	-0.0450642	0.0402599	-0.0983376	0.0756119	0.0227257	-0.190795	0.069998	0.120797	0.00761508	-0.106666	0.0990506
P46062	0.0172954	-0.0270065	0.0097111	-0.0550459	0.118324	-0.063278	0.0458963	-0.0338305	-0.0120658	-0.0128125	0.00923389	0.00357857	-0.0342111	0.0503317	-0.0161206
P46413	NA	NA	NA	NA	NA	NA	NA	NA	NA	-0.0491535	0.0460241	0.00312934	-0.00431249	0.049018	-0.0447055
P46462	-0.0178901	0.031059	-0.0131688	-0.0131609	-0.00837915	0.0215401	-0.0274894	0.0326126	-0.0051232	-0.0608771	0.0724146	-0.0115374	0.0042003	0.0130479	-0.0172482
P46467	0.101064	0.0263592	-0.127423	-0.0626679	0.0254723	0.0371956	-0.0237012	-0.011852	0.0355532	0.0816849	0.00786493	-0.0895498	-0.0470798	-0.0160407	0.0631206
P46471	0.0218198	-0.0250295	0.00320969	-0.0280268	0.0463522	-0.0183254	NA	NA	NA	-0.0999813	0.0446909	0.0552904	0.0166086	-0.0566241	0.0400154
P46664	-0.0163629	-0.0799989	0.0963618	-0.29725	0.113575	0.183675	-0.0347006	0.089794	-0.0550934	-0.00628754	-0.0758984	0.0821859	-0.0152066	-0.0283321	0.0435387
P46844	0.0150487	0.291373	-0.306422	0.137118	-0.127511	-0.00960682	-0.141144	0.16033	-0.0191865	-0.247329	0.114913	0.132416	0.00339307	0.0855391	-0.0889321
P46978	-0.0828975	0.0308209	0.0520766	-0.0252376	-0.00822639	0.033464	-0.0715948	0.0921193	-0.0205245	-0.175841	0.0665496	0.109292	0.00410063	-0.0653877	0.0612871
P47197	0.0699976	-0.0105176	-0.05948	0.0530112	-0.0186167	-0.0343946	-0.0366344	0.0231436	0.0134907	NA	NA	NA	0.0664678	-0.0436622	-0.0228056
P47245	NA	NA	NA	NA	NA	NA	NA	NA	NA	-0.0833749	0.116408	-0.0330335	-0.0602848	-0.0543921	0.114677
P47713	NA	NA	NA	-0.0485596	0.129438	-0.080878	NA	NA	NA	NA	NA	NA	0.0461687	-0.014305	-0.0318637
P47727	0.0397095	0.0627542	-0.102464	0.0492348	-0.0311646	-0.0180702	0.0161415	0.145407	-0.161549	0.00888068	-0.184788	0.175907	NA	NA	NA
P47754	0.0200634	0.00917939	-0.0292428	0.0245772	0.00390152	-0.0284787	0.0770185	-0.0660255	-0.010993	0.0521669	0.013198	-0.0653649	0.0293606	-0.0269853	-0.00237533
P47791	0.0481644	-0.0291162	-0.0190482	NA	NA	NA	0.0919159	0.0949904	-0.186906	-0.0476717	-0.0878522	0.135524	0.00126883	0.0163302	-0.017599
P47811	0.0610865	-0.0154669	-0.0456196	-0.13453	0.000365598	0.134165	0.0705481	-0.0446198	-0.0259283	NA	NA	NA	-0.0469077	-0.0774726	0.12438
P47860	-0.0603286	-0.149371	0.2097	-0.0758322	0.0595144	0.0163177	0.153486	0.107296	-0.260782	0.0475673	-0.00154351	-0.0460238	0.118061	-0.0911828	-0.0268779
P47875	0.0356581	0.0409615	-0.0766196	0.0895573	0.0231164	-0.112674	0.0621879	-0.148795	0.0866075	0.0617844	0.00152563	-0.0633101	0.0663146	-0.00997145	-0.0563432
P47941	-0.0383595	0.0685152	-0.0301557	NA	NA	NA	-0.0596869	0.117795	-0.0581079	-0.046868	0.150226	-0.103358	0.0389487	0.0425779	-0.0815266
P47961	NA	NA	NA	0.0439203	-0.152332	0.108411	NA	NA	NA	NA	NA	NA	-0.087848	-0.0194615	0.10731
P47967	NA	NA	NA	NA	NA	NA	NA	NA	NA	NA	NA	NA	0.120131	0.0298641	-0.149995
P47968	0.0661649	-0.081415	0.0152501	-0.0316449	-0.0493451	0.08099	0.04163	-0.0113775	-0.0302525	0.0941531	-0.0701744	-0.0239787	-0.0262178	0.00459952	0.0216183
P48004	NA	NA	NA	NA	NA	NA	-0.0894149	-0.0563332	0.145748	-0.0424509	0.00340773	0.0390432	0.00674239	-0.0424943	0.0357519
P48024	-0.0475381	0.0568794	-0.00934133	0.123518	-0.149264	0.0257461	0.0878571	-0.19472	0.106863	NA	NA	NA	-0.103051	-0.0135415	0.116593
P48037	0.0141744	-0.0991603	0.0849859	0.0393779	-0.154694	0.115316	-0.126389	0.242311	-0.115922	-0.20693	0.213001	-0.00607133	-0.0218128	0.00689852	0.0149143
P48500	0.0115621	-0.101375	0.0898126	-0.030459	0.0947666	-0.0643077	-0.0185781	0.0899486	-0.0713705	0.0144333	0.0302904	-0.0447237	-0.0207674	0.0330393	-0.0122718
P48721	NA	NA	NA	NA	NA	NA	NA	NA	NA	NA	NA	NA	-0.0582892	-0.0310833	0.0893725
P48962	NA	NA	NA	NA	NA	NA	NA	NA	NA	-0.296626	0.256339	0.0402867	0.0346776	0.00588563	-0.0405633
P48975	0.0550007	-0.0266678	-0.0283329	0.0384853	0.0104351	-0.0489205	0.108162	-0.0554525	-0.0527099	0.0640663	0.0215924	-0.0856587	0.0586232	-0.0022379	-0.0563853
P48999	NA	NA	NA	NA	NA	NA	NA	NA	NA	0.114746	-0.230546	0.1158	NA	NA	NA
P49020	-0.0506367	0.068993	-0.0183563	0.0549872	0.0429203	-0.0979075	0.149962	-0.116145	-0.033817	NA	NA	NA	NA	NA	NA
P49088	-0.139891	0.104909	0.0349813	-0.264478	0.210591	0.0538878	-0.122891	-0.098317	0.221208	-0.0511555	-0.17248	0.223636	-0.102464	0.10498	-0.00251595
P49136	NA	NA	NA	-0.00521889	-0.0673412	0.0725601	-0.0578098	0.0249983	0.0328115	NA	NA	NA	NA	NA	NA
P49138	0.027925	-0.174663	0.146738	NA	NA	NA	NA	NA	NA	NA	NA	NA	-0.0393659	0.0213755	0.0179905
P49242	-0.0837715	-0.0141104	0.0978819	0.0164788	-0.166885	0.150406	-0.205688	0.0639862	0.141702	-0.282824	0.0130773	0.269747	-0.0840243	-0.0876647	0.171689
P49290	0.969134	-0.534477	-0.434657	1.36792	-0.689827	-0.678088	0.929399	-0.269156	-0.660243	1.23083	-0.365756	-0.865071	1.04978	0.0983983	-1.14818
P49430	NA	NA	NA	NA	NA	NA	NA	NA	NA	NA	NA	NA	0.0218428	0.0166724	-0.0385152
P49432	-0.0378037	0.0326159	0.00518784	0.0708315	-9.55e-05	-0.070736	-0.0740272	0.0240274	0.0499998	-0.122578	0.050159	0.0724195	-0.0634795	-0.0108421	0.0743215
P49710	0.00783832	0.0503502	-0.0581885	-0.00262312	-0.0180875	0.0207106	-0.00610498	0.00751168	-0.0014067	0.0781304	-0.0480429	-0.0300875	-0.0218631	0.00464742	0.0172156
P49717	-0.102582	-0.0377845	0.140367	-0.111783	-0.0799425	0.191725	-0.179774	0.102813	0.0769611	-0.124473	-0.0110468	0.13552	-0.111242	0.0306743	0.0805675
P49718	-0.0988088	-0.095139	0.193948	-0.208703	0.0319685	0.176734	-0.0897474	0.0306073	0.0591401	-0.0832912	-0.00556198	0.0888532	-0.0278285	0.057565	-0.0297365
P49722	0.0805396	-0.102589	0.0220498	-0.0737162	0.0190742	0.054642	0.105755	-0.0139741	-0.110137	-0.0709685	0.0253832	0.0455853	0.144234	-0.0839886	-0.0602455
P49793	0.0847245	-0.039052	-0.0456725	0.14401	-0.123172	-0.0208377	NA	NA	NA	NA	NA	NA	NA	NA	NA
P49911	NA	NA	NA	NA	NA	NA	NA	NA	NA	NA	NA	NA	0.00833051	0.0245172	-0.0328477
P50115	-0.0440799	-0.0267025	0.0707824	-0.117302	0.194816	-0.0775141	0.00887143	-0.0248738	0.0160024	0.109546	-0.0581675	-0.0513784	-0.068671	0.0651674	0.00350361
P50116	-0.0620072	-0.0106629	0.0726701	-0.00953875	0.0881944	-0.0786557	0.137748	-0.192747	0.0549989	0.144863	-0.0829696	-0.0618931	0.00413605	-0.0326063	0.0284703
P50137	0.0768001	-0.179707	0.102907	0.0130113	-0.129548	0.116537	0.128907	-0.0422733	-0.0866333	0.0199993	-0.0285507	0.00855146	-0.019844	-0.0887296	0.108574
P50282	0.00505086	-0.0889299	0.083879	-0.253151	0.263877	-0.0107265	-0.0481849	-0.0907185	0.138903	0.280661	-0.163825	-0.116836	-0.0817414	0.0662678	0.0154735
P50339	-0.473627	-0.504268	0.977895	NA	NA	NA	NA	NA	NA	NA	NA	NA	2.28036	-1.54807	-1.11931
P50393	NA	NA	NA	NA	NA	NA	NA	NA	NA	0.105826	-0.130911	0.0250858	NA	NA	NA
P50396	NA	NA	NA	NA	NA	NA	-0.215937	0.161078	0.0548589	NA	NA	NA	NA	NA	NA
P50398	0.158907	0.0049741	-0.163881	-0.00270516	-0.0742908	0.076996	NA	NA	NA	0.176258	-0.0364593	-0.139799	0.0813452	-0.0251166	-0.0562287
P50430	0.0170194	0.202197	-0.219216	-0.249458	0.325141	-0.0756824	0.0725499	-0.109252	0.0367022	0.142298	-0.0166317	-0.125667	0.336376	-0.142015	-0.194361
P50431	0.0124918	0.0287413	-0.0412331	NA	NA	NA	NA	NA	NA	-0.321531	0.0861367	0.235394	0.0514786	-0.111862	0.0603833
P50475	-0.116222	0.143593	-0.0273708	-0.0152634	0.00580071	0.00946266	NA	NA	NA	-0.0517531	-0.0478667	0.0996198	0.239396	-0.0789826	-0.160413
P50503	0.0247462	-0.0298696	0.0051234	-0.107262	0.0516597	0.0556019	NA	NA	NA	-0.150221	0.0109635	0.139258	0.050774	-0.0196402	-0.0311338
P50516	0.058781	-0.0223265	-0.0364546	-0.0515474	-0.0187693	0.0703167	-0.0109699	-0.0341984	0.0451683	0.0175082	0.00690262	-0.0244108	-0.0348902	0.028913	0.00597714
P50518	0.0536049	-0.0329286	-0.0206763	0.0750169	0.000127474	-0.0751444	0.0215086	0.0476689	-0.0691774	0.00441899	0.055893	-0.0603119	-0.0716913	-0.00491609	0.0766074
P50545	0.0646968	-0.00321447	-0.0614823	0.000164401	0.0154587	-0.0156231	0.0538331	-0.0166023	-0.0372308	0.0585018	0.0258894	-0.0843912	-0.0268548	0.0181335	0.00872138
P50580	-0.141731	0.00460255	0.137128	-0.0733292	0.0455421	0.0277871	-0.178986	0.0623264	0.11666	-0.187836	0.106687	0.0811485	-0.0695099	0.106915	-0.0374047
P50878	-0.137704	-0.0702741	0.207978	0.0137845	-0.13245	0.118665	-0.221007	0.138144	0.0828636	-0.299708	0.121702	0.178006	-0.102559	-0.0856932	0.188252
P51111	NA	NA	NA	NA	NA	NA	NA	NA	NA	0.374747	-0.371581	-0.00316648	NA	NA	NA
P51437	0.141819	-0.16431	0.022491	-0.105933	0.0094339	0.0964995	0.113971	-0.108971	-0.00499967	0.147993	-0.211983	0.0639905	-0.0212083	-0.0376533	0.0588616
P51577	NA	NA	NA	NA	NA	NA	0.247929	0.093537	-0.341466	NA	NA	NA	NA	NA	NA
P51583	-0.107446	-0.0249871	0.132433	-0.0329194	-0.0412151	0.0741345	NA	NA	NA	-0.0922079	0.0674892	0.0247187	0.00245247	0.00845049	-0.010903
P51635	0.0590356	-0.0535124	-0.00552324	0.0601445	-0.13579	0.0756452	-0.105476	0.160312	-0.0548363	-0.120455	0.0943388	0.0261165	0.0304225	-0.00380551	-0.026617
P51859	-0.0299127	0.0223478	0.00756492	0.0183123	-0.028749	0.0104366	-0.0386651	0.172457	-0.133792	-0.0759219	0.03242	0.0435019	-0.0923106	0.0384986	0.0538121
P51863	0.056752	-0.0578398	0.00108776	-0.0237475	0.0280892	-0.00434173	0.0595107	0.0146984	-0.0742091	0.0229457	0.0249525	-0.0478981	-0.011962	0.0410277	-0.0290657
P51881	0.00442465	0.0896703	-0.094095	0.0836208	-0.0510508	-0.03257	-0.0925962	0.02766	0.0649361	-0.156482	0.0889341	0.0675478	-0.0210668	-0.028141	0.0492078
P52303	NA	NA	NA	-0.071698	-0.00908552	0.0807835	NA	NA	NA	NA	NA	NA	NA	NA	NA
P52480	0.0646371	-0.000484027	-0.0641531	-0.0358604	0.0786272	-0.0427668	0.266285	-0.0248235	-0.241461	0.0815803	-0.0211607	-0.0604197	0.0536461	-0.0942239	0.0405778
P52555	-0.0699983	0.047542	0.0224563	0.0751208	-0.0752869	0.000166098	-0.117378	0.172473	-0.0550952	-0.147925	0.0401584	0.107766	-0.0886756	0.0126594	0.0760162
P52624	0.0642415	0.181713	-0.245955	0.0472185	0.316306	-0.363524	0.183646	-0.00165597	-0.18199	0.332616	-0.0808821	-0.251734	0.165267	-0.038705	-0.126562
P52631	-0.0280368	-0.0130446	0.0410814	-0.120614	-0.00692238	0.127536	-0.115352	0.0121999	0.103152	0.00281976	-0.092889	0.0900692	NA	NA	NA
P52632	0.104497	-0.0209875	-0.0835097	0.186067	-0.0811775	-0.10489	0.116566	-0.136647	0.0200814	NA	NA	NA	0.153835	-0.0327811	-0.121054
P52633	NA	NA	NA	0.023119	-0.0912514	0.0681324	NA	NA	NA	-0.0442213	0.00271763	0.0415037	0.00235919	-0.0649613	0.0626021
P52759	0.0464357	-0.0253526	-0.0210831	-0.0544826	-0.0376494	0.0921319	-0.0187832	0.032468	-0.0136849	0.0303544	0.0222116	-0.052566	-0.061226	0.0109887	0.0502374
P52925	0.0241515	-0.132918	0.108767	-0.0129645	-0.078814	0.0917785	-0.0704004	0.0261891	0.0442113	0.0666808	-0.0523444	-0.0143364	-0.0630694	-0.0264427	0.0895121
P53026	-0.109041	-0.0124974	0.121538	0.0101431	-0.152348	0.142205	-0.24751	0.144005	0.103505	-0.321567	0.0467337	0.274833	-0.0845552	-0.0456646	0.13022
P53042	0.0237634	-0.0522339	0.0284705	-0.0423051	-0.0492331	0.0915382	-0.0861952	0.0409232	0.045272	-0.000140353	0.0458495	-0.0457091	-0.0460254	-0.0237774	0.0698028
P53534	NA	NA	NA	-0.0791619	0.0266468	0.0525151	0.0200665	0.0460316	-0.0660981	0.0507065	0.0227114	-0.0734179	NA	NA	NA
P53676	NA	NA	NA	NA	NA	NA	NA	NA	NA	0.0957766	0.0471504	-0.142927	NA	NA	NA
P53986	NA	NA	NA	-0.0646834	0.162938	-0.0982546	NA	NA	NA	NA	NA	NA	NA	NA	NA
P53987	-0.168127	0.0799799	0.088147	NA	NA	NA	-0.150577	0.12625	0.024327	-0.0278021	0.153103	-0.125301	NA	NA	NA
P53994	0.0411999	0.00975965	-0.0509596	NA	NA	NA	0.0135956	-0.00101277	-0.0125828	0.070237	-0.00789488	-0.0623422	0.00197327	-0.0153396	0.0133664
P54071	-0.0258006	0.0736667	-0.0478661	0.110144	0.000691919	-0.110836	-0.0482731	0.0783389	-0.0300658	-0.127772	0.0843744	0.0433979	3.83e-05	0.0294212	-0.0294596
P54100	-0.038238	0.0598826	-0.0216445	0.00874222	-0.000256569	-0.00848565	0.0355772	0.0190451	-0.0546223	-0.0204654	-0.0139657	0.0344312	0.0423057	-0.00555203	-0.0367537
P54116	0.00175827	0.019607	-0.0213653	-0.0739202	0.112007	-0.0380869	0.0148714	-0.0521724	0.037301	0.0766165	0.00635727	-0.0829737	-0.236451	0.166886	0.0695649
P54645	0.095876	-0.00170553	-0.0941705	0.0420907	-0.0253043	-0.0167864	0.0724976	-0.0470427	-0.0254548	0.0889045	-0.0530055	-0.0358989	0.0563554	-0.0266588	-0.0296966
P54731	0.183782	0.10803	-0.291812	-0.177679	0.0561263	0.121553	0.12071	-0.123027	0.00231757	-0.057371	-0.0518473	0.109218	NA	NA	NA
P54775	0.00233867	-0.0227588	0.0204201	0.0799087	-0.087653	0.00774433	-0.085454	-0.0206044	0.106058	-0.0571386	-0.0251222	0.0822608	-0.0315506	-0.0749962	0.106547
P54818	NA	NA	NA	-0.0717333	0.025184	0.0465493	NA	NA	NA	0.0983968	-0.120216	0.0218194	NA	NA	NA
P54822	NA	NA	NA	0.0145456	0.0383974	-0.0529429	0.0272952	-0.0626149	0.0353196	NA	NA	NA	NA	NA	NA
P54823	-0.111679	-0.0319801	0.143659	-0.0274335	-0.0256964	0.0531299	NA	NA	NA	NA	NA	NA	NA	NA	NA
P54921	0.0882928	0.00812216	-0.0964149	0.0407655	-0.035284	-0.00548155	0.0446107	0.0311906	-0.0758013	0.0088728	0.120949	-0.129821	0.0490565	-0.0534172	0.00436064
P55053	NA	NA	NA	NA	NA	NA	NA	NA	NA	-0.123229	0.123097	0.000131776	NA	NA	NA
P55062	NA	NA	NA	-0.0998821	-0.122246	0.222128	0.0357906	-0.0159167	-0.0198739	NA	NA	NA	NA	NA	NA
P55194	0.00453898	0.00600932	-0.0105483	NA	NA	NA	-0.0445143	0.0897917	-0.0452774	0.0247346	0.0464483	-0.0711829	-0.0158587	0.108312	-0.0924532
P55213	NA	NA	NA	0.280999	-0.165093	-0.115906	NA	NA	NA	NA	NA	NA	NA	NA	NA
P55258	0.00627652	-0.000132605	-0.00614392	0.0527961	-0.0968346	0.0440384	-0.0190399	0.0304914	-0.0114515	-0.00332634	0.00502948	-0.00170314	-0.0596656	-0.0188348	0.0785004
P56212	NA	NA	NA	NA	NA	NA	NA	NA	NA	0.072239	-0.039867	-0.0323719	NA	NA	NA
P56376	-0.000774869	-0.0757261	0.076501	-0.0348691	-0.102237	0.137106	NA	NA	NA	-0.0529635	0.0821714	-0.0292079	0.0930457	-0.159888	0.0668421
P56391	-0.0576567	0.0689013	-0.0112446	0.077724	0.0447882	-0.122512	-0.104411	0.0335108	0.0709003	NA	NA	NA	-0.0683242	-0.0116437	0.0799679
P56399	0.0674922	0.0225832	-0.0900754	0.0110669	-0.0477258	0.0366589	-0.033147	0.0279622	0.0051848	-0.0537326	0.0521767	0.00155588	0.0164144	-0.0122339	-0.00418058
P56571	-0.0101132	0.0341355	-0.0240223	0.0478491	-0.0291493	-0.0186998	0.109875	-0.00614765	-0.103727	0.0314597	0.0178634	-0.0493231	0.0302007	-0.0197046	-0.0104961
P56603	NA	NA	NA	NA	NA	NA	NA	NA	NA	-0.0966412	0.140196	-0.0435547	NA	NA	NA
P56812	NA	NA	NA	NA	NA	NA	NA	NA	NA	-0.0452211	-0.0172694	0.0624905	-0.0608689	-0.0186442	0.0795131
P56959	0.00653498	-0.0358885	0.0293536	0.0662352	-0.0596086	-0.00662659	-0.0793068	0.127302	-0.0479951	-0.117832	-0.0157281	0.13356	-0.0530355	-0.0101025	0.063138
P57044	NA	NA	NA	NA	NA	NA	NA	NA	NA	NA	NA	NA	0.096156	0.0452759	-0.141432
P57716	0.00443946	0.0798023	-0.0842418	NA	NA	NA	NA	NA	NA	NA	NA	NA	NA	NA	NA
P57746	0.129138	-0.0523971	-0.0767409	-0.0353283	0.0890126	-0.0536842	0.0784651	0.0443618	-0.122827	0.0790224	0.0381139	-0.117136	-0.0665343	0.0375461	0.0289882
P57756	0.0111481	-0.220867	0.209719	0.396854	-0.750189	0.353335	-0.503231	0.614361	-0.11113	-0.860732	0.549009	0.311723	-0.657196	0.11572	0.541476
P57784	0.0451622	-0.0424085	-0.00275366	0.0311665	0.00343547	-0.034602	-0.0291018	0.0943606	-0.0652588	-0.0783066	-0.000493099	0.0787997	-0.134223	0.0706246	0.0635981
P58021	NA	NA	NA	NA	NA	NA	NA	NA	NA	-0.0652829	-0.0406956	0.105978	-0.0581117	-0.0178859	0.0759976
P58058	-0.133415	0.122577	0.0108387	-0.108163	0.0165239	0.0916388	0.0562748	-0.163914	0.10764	-0.00983842	-0.0392391	0.0490775	-0.0546487	-0.0627891	0.117438
P58200	NA	NA	NA	NA	NA	NA	NA	NA	NA	0.150169	-0.127617	-0.0225522	NA	NA	NA
P58281	NA	NA	NA	NA	NA	NA	NA	NA	NA	-0.0879842	0.10961	-0.0216261	0.0121664	-0.0334825	0.0213162
P58389	0.019439	-0.0576142	0.0381751	0.0331965	-0.0345572	0.00136073	-0.0168319	0.0274241	-0.0105922	0.0646229	0.0310228	-0.0956457	-0.0231413	0.000739856	0.0224014
P58854	NA	NA	NA	NA	NA	NA	NA	NA	NA	-0.0664026	0.0371221	0.0292805	NA	NA	NA
P59108	0.0531846	-0.027443	-0.0257416	-0.0691321	-0.0127048	0.081837	0.0858498	-0.1181	0.0322506	0.0631781	0.0459039	-0.109082	-0.0509962	0.0324473	0.0185489
P59325	0.0408282	0.00475955	-0.0455878	-0.157548	0.0957822	0.0617658	-0.108969	0.173048	-0.0640793	0.00848468	-0.0257046	0.0172199	-0.0679289	-0.00726449	0.0751934
P59708	-0.0182366	-0.0278857	0.0461224	-0.0776482	-0.0450008	0.122649	NA	NA	NA	-0.149109	-0.0338387	0.182948	NA	NA	NA
P59999	-0.0015652	0.0156982	-0.014133	0.00274567	-0.0416089	0.0388632	0.0634864	-0.0346383	-0.0288482	0.0741564	-0.0204134	-0.0537429	0.0784931	-0.0958291	0.017336
P60122	0.0116518	-0.0116133	-3.85e-05	0.000633537	-0.0593647	0.0587311	-0.0929444	0.099915	-0.00697053	-0.039009	0.0658788	-0.0268698	0.00765068	0.0200055	-0.0276561
P60229	0.0439527	-0.0631463	0.0191937	-0.133289	0.06832	0.0649695	-0.0769579	-0.0613231	0.138281	-0.114095	-0.00210173	0.116197	-0.039151	-0.0819516	0.121103
P60335	-0.100596	-0.0159958	0.116591	-0.0383642	0.0938171	-0.0554528	-0.128765	0.0401061	0.0886593	-0.105032	0.0417145	0.0633179	-0.0322565	-0.0446463	0.0769028
P60766	0.0603664	-0.011537	-0.0488295	-0.0778867	0.0938927	-0.016006	0.0585262	0.0320877	-0.090614	0.0567346	0.0399121	-0.0966466	-0.11191	0.063804	0.0481055
P60843	-0.215073	0.022571	0.192502	-0.115885	-0.0455832	0.161468	-0.165178	0.0459633	0.119214	-0.112969	-0.0279452	0.140915	-0.0817338	-0.0456297	0.127363
P60867	-0.134204	-0.00451095	0.138715	0.0922693	-0.219463	0.127194	-0.252184	0.118048	0.134136	-0.221509	0.079221	0.142288	-0.0878452	0.0571753	0.0306698
P60901	-0.00144689	-0.026255	0.0277019	-0.0316	-0.063826	0.095426	-0.0448187	0.0434809	0.00133774	-0.0535684	-0.00279895	0.0563674	0.00636773	-0.0662767	0.059909
P60904	0.110437	0.0223128	-0.13275	0.0449204	0.0555113	-0.100432	0.0497141	-0.0158393	-0.0338748	0.199215	0.0511904	-0.250406	NA	NA	NA
P61021	0.0481933	-0.0998316	0.0516382	-0.0320781	-0.0486765	0.0807546	0.0459879	0.0526888	-0.0986767	-0.0850047	0.0218641	0.0631406	-0.0463503	-0.0677091	0.114059
P61022	-0.0354403	0.0627121	-0.0272718	0.00516466	0.0198565	-0.0250211	0.0610995	-0.0268737	-0.0342258	0.139241	-0.0808905	-0.0583504	NA	NA	NA
P61027	-0.0409565	-0.163455	0.204411	-0.0574004	0.164049	-0.106649	0.0601314	-0.0947328	0.0346014	-0.117404	0.115049	0.00235514	0.0106759	-0.0205699	0.00989401
P61028	0.118094	-0.0324867	-0.0856071	NA	NA	NA	0.0962477	-0.0671611	-0.0290866	0.0934262	0.00441478	-0.097841	NA	NA	NA
P61079	-0.0542618	0.100885	-0.046623	NA	NA	NA	NA	NA	NA	-0.128625	0.00945606	0.119169	-0.124242	-0.0639042	0.188146
P61082	NA	NA	NA	0.029332	-0.0147392	-0.0145928	-0.0692036	0.0243688	0.0448348	0.00289825	0.0076082	-0.0105064	NA	NA	NA
P61087	-0.131946	0.0850242	0.0469215	0.00294095	0.0274727	-0.0304137	-0.030393	0.000904839	0.0294881	0.0306463	0.0454887	-0.076135	-0.0356719	0.00207211	0.0335998
P61107	0.0295358	-0.0157614	-0.0137744	0.0677339	-0.0225745	-0.0451594	0.0136607	0.0152383	-0.028899	-0.0222349	0.0311018	-0.00886688	-0.0173865	-0.0107281	0.0281146
P61161	0.0330808	-0.027089	-0.00599172	0.0370126	-0.0171222	-0.0198904	0.021104	0.0921305	-0.113234	0.0954542	-0.0448032	-0.0506511	0.0565898	-0.0631228	0.00653294
P61164	0.0320609	0.0469462	-0.0790071	0.0931252	0.0120387	-0.105164	0.0145436	0.00629541	-0.020839	-0.0377374	0.00561325	0.0321241	0.0094642	0.0170102	-0.0264743
P61205	0.0810688	-0.0288966	-0.0521722	-0.0344173	0.0180936	0.0163237	0.103212	-0.105898	0.00268524	0.039955	-0.0297371	-0.0102179	-0.0223956	0.0187048	0.00369076
P61211	0.0032724	-0.0156587	0.0123863	-0.0535324	0.0198206	0.0337119	-0.000829137	0.0345172	-0.033688	-0.105255	0.078471	0.0267837	-0.132203	0.049519	0.0826838
P61222	-0.0253898	-0.0296767	0.0550666	-0.0903402	-0.0436559	0.133996	NA	NA	NA	-0.29243	0.0560484	0.236382	NA	NA	NA
P61255	-0.15986	-0.0501454	0.210006	0.00105889	-0.199394	0.198336	-0.27805	0.111058	0.166993	-0.220122	-0.0494311	0.269553	NA	NA	NA
P61290	NA	NA	NA	NA	NA	NA	NA	NA	NA	-0.318661	0.126691	0.19197	NA	NA	NA
P61327	0.0257456	-0.0531375	0.0273918	-0.00224465	0.00939613	-0.00715148	0.0100113	0.0740807	-0.084092	-0.120006	0.0726628	0.0473432	0.0597283	-0.0624906	0.00276235
P61358	-0.0977788	-0.0530254	0.150804	0.0265427	-0.169837	0.143295	-0.287832	0.110391	0.177441	-0.351712	0.0684347	0.283277	-0.0579384	-0.0716539	0.129592
P61514	-0.162717	-0.149142	0.311859	-0.0720972	-0.145732	0.217829	NA	NA	NA	NA	NA	NA	NA	NA	NA
P61620	-0.040801	0.00996941	0.0308316	0.0470566	-0.0718785	0.0248219	-0.177862	0.115833	0.0620289	-0.094547	0.0408349	0.0537121	NA	NA	NA
P61806	-0.110699	0.0412646	0.0694345	-0.0166742	-0.0210727	0.0377469	-0.113754	0.00673404	0.10702	-0.147993	0.0308952	0.117098	-0.104502	0.0244578	0.080044
P61924	0.0248481	0.0185175	-0.0433655	0.0846378	0.015096	-0.0997338	0.061763	-0.0620713	0.000308332	0.117592	-0.0179643	-0.0996279	0.062197	0.0992036	-0.161401
P61961	0.0333568	0.103759	-0.137115	0.0176197	0.0723177	-0.0899374	0.0226143	-0.0308484	0.00823411	-0.115611	0.0362782	0.0793332	0.0413016	-0.0182098	-0.0230918
P61971	0.0642683	-0.0897995	0.0255312	NA	NA	NA	-0.106889	0.114948	-0.00805861	-0.0419534	-0.0301825	0.0721359	NA	NA	NA
P61979	0.00513325	0.0180227	-0.0231559	0.0493857	-0.0537085	0.00432282	-0.105194	0.0567322	0.0484621	-0.134549	0.0499841	0.0845652	-0.0219974	-0.0698453	0.0918427
P61982	0.0380636	-0.0368935	-0.00117013	0.102876	-0.000849623	-0.102026	-0.0916571	0.0767934	0.0148638	0.0905153	0.0144565	-0.104972	-0.0466559	-0.0384198	0.0850757
P62082	-0.0507168	-0.00103924	0.051756	-0.00627739	-0.0876215	0.0938989	-0.187931	0.0627668	0.125165	-0.296145	0.0580403	0.238104	-0.0590931	-0.0566042	0.115697
P62138	0.00760441	0.0041717	-0.0117761	0.00792081	-0.0794755	0.0715546	-0.0131454	-0.00373676	0.0168822	0.0296508	-0.0285575	-0.00109332	-0.0323565	0.0170119	0.0153446
P62192	0.0372329	-0.0574858	0.0202529	-0.0424867	0.0297865	0.0127002	0.0196574	-0.0195834	-7.41e-05	-0.0595635	0.0409836	0.0185799	-0.0300286	0.0669958	-0.0369672
P62196	-0.010208	-0.0285221	0.0387301	0.0384903	-0.00207914	-0.0364112	-0.0055368	0.0431473	-0.0376105	-0.0157	-0.118639	0.134339	-0.021391	0.0431049	-0.0217139
P62204	0.0407812	-0.0544952	0.013714	0.0897889	-0.0741287	-0.0156602	0.0208977	-0.0597584	0.0388607	-0.0189429	-0.0442286	0.0631715	0.0441344	-0.00676745	-0.0373669
P62242	-0.117563	-0.0417646	0.159327	-0.040843	-0.0598153	0.100658	-0.150102	0.0695291	0.0805726	-0.219116	0.00966588	0.20945	-0.0324164	-0.0791848	0.111601
P62245	-0.0358159	-0.0522797	0.0880956	0.106383	-0.146505	0.0401221	-0.238488	0.18453	0.0539578	-0.289249	0.0562815	0.232968	-0.0697357	0.0391844	0.0305513
P62259	-0.00079212	-0.00627964	0.00707176	-0.0343034	-0.0263799	0.0606833	-0.0202508	0.0159658	0.004285	-0.0469069	0.0272253	0.0196816	-0.0137148	-0.02294	0.0366547
P62270	-0.151047	-0.00191709	0.152964	-0.0157168	-0.0858823	0.101599	-0.207865	0.112177	0.095688	-0.310995	0.0617986	0.249197	-0.0921682	0.0132589	0.0789093
P62274	-0.291194	-0.060893	0.352087	-0.0991001	-0.126545	0.225645	-0.231805	0.0406141	0.191191	NA	NA	NA	NA	NA	NA
P62281	-0.202697	0.0289785	0.173718	-0.0452854	-0.117102	0.162387	-0.230843	0.091465	0.139378	-0.278639	0.0627501	0.215888	-0.103221	-0.0231435	0.126365
P62298	-0.128484	-0.0503039	0.178788	-0.000809693	-0.133375	0.134185	-0.210155	0.0743166	0.135839	-0.246124	0.032378	0.213746	-0.0947242	-0.0188269	0.113551
P62301	-0.0570124	-0.0247283	0.0817406	-0.0157863	-0.138191	0.153977	-0.209017	0.150806	0.0582101	-0.278638	0.0756016	0.203036	-0.0790133	0.0345238	0.0444895
P62305	NA	NA	NA	NA	NA	NA	0.049082	0.128522	-0.177604	NA	NA	NA	NA	NA	NA
P62309	0.00504147	0.00436407	-0.00940554	-0.0211805	0.0240583	-0.00287784	-0.0993887	0.0723509	0.0270378	-0.0989355	0.00357264	0.0953629	-0.0428164	-0.0107688	0.0535852
P62311	NA	NA	NA	NA	NA	NA	NA	NA	NA	NA	NA	NA	0.0442033	-0.0160622	-0.0281411
P62313	NA	NA	NA	NA	NA	NA	NA	NA	NA	-0.0580139	0.071374	-0.0133601	NA	NA	NA
P62315	-0.0367895	-0.0710459	0.107835	-0.0228077	0.0186586	0.00414906	-0.0775034	0.100478	-0.022975	-0.046001	-0.0130825	0.0590835	-0.0232021	-0.0700797	0.0932818
P62317	-0.0016029	0.00654712	-0.00494421	0.0928952	-0.107864	0.0149691	0.00041142	0.127678	-0.12809	-0.0397278	0.0136595	0.0260683	0.012588	-0.0309563	0.0183683
P62320	-0.0111939	0.000690371	0.0105035	-0.136712	-0.0527565	0.189468	-0.103342	0.155631	-0.0522886	-0.175868	-0.00925718	0.185125	-0.000707212	-0.0589513	0.0596585
P62331	0.117883	0.0125522	-0.130435	-0.0828004	0.028876	0.0539244	0.00516406	-0.034398	0.029234	-0.0127868	0.007997	0.00478976	0.0114005	0.0198491	-0.0312496
P62334	0.0295201	0.0164103	-0.0459304	-0.119439	0.0694764	0.0499623	-0.0171635	0.0369123	-0.0197487	-0.148252	0.0958798	0.0523722	-0.0181665	-0.00102879	0.0191953
P62482	-0.0657475	0.0526117	0.0131358	-0.165743	0.035439	0.130304	0.0654308	-0.0721585	0.0067277	0.0544329	-0.0853466	0.0309137	-0.0429297	-0.00660134	0.0495311
P62496	-0.0374443	0.0171881	0.0202562	-0.111792	-0.024816	0.136609	0.0124882	0.0608424	-0.0733306	-0.122533	0.0191655	0.103367	-0.0320613	-0.038203	0.0702643
P62627	NA	NA	NA	NA	NA	NA	NA	NA	NA	0.0421627	0.067505	-0.109668	0.103052	-0.0260631	-0.0769887
P62629	-0.100356	0.0055196	0.0948363	-0.123815	-0.0160965	0.139912	-0.11975	0.0325127	0.0872372	-0.219555	0.0521549	0.1674	-0.0524909	-0.0171771	0.069668
P62704	-0.0820552	-0.0281161	0.110171	NA	NA	NA	-0.219332	0.115907	0.103425	-0.308381	0.0934402	0.21494	NA	NA	NA
P62715	NA	NA	NA	NA	NA	NA	0.044423	0.0495642	-0.0939872	0.0446834	0.0037356	-0.048419	-0.0095681	0.018543	-0.00897486
P62717	-0.103165	-0.0558363	0.159002	0.0836652	-0.319769	0.236103	-0.283387	0.0987642	0.184623	-0.398292	0.146896	0.251397	-0.131035	-0.036208	0.167243
P62743	NA	NA	NA	NA	NA	NA	NA	NA	NA	0.0393729	-0.0417549	0.00238205	NA	NA	NA
P62748	0.0364099	-0.0444602	0.00805034	-0.0127058	-0.0305859	0.0432917	0.0384029	-0.0354933	-0.00290967	0.024347	0.0101635	-0.0345104	-0.0259365	0.0238963	0.00204013
P62751	-0.108869	-0.0114629	0.120332	0.00188269	-0.104172	0.10229	-0.221268	0.114856	0.106412	-0.256618	0.0360574	0.220561	-0.0802297	-0.0317199	0.11195
P62754	-0.0816196	0.0328541	0.0487656	0.0155935	-0.0715095	0.0559159	-0.14893	0.0549965	0.0939335	-0.182561	0.00309017	0.17947	-0.0534508	-0.019927	0.0733778
P62774	0.0336589	-0.0199474	-0.0137116	-0.0476693	0.0672259	-0.0195566	-0.0821167	0.134701	-0.0525843	-0.00912366	0.0119317	-0.00280809	-0.0663822	0.0417624	0.0246198
P62806	0.070227	-0.0406772	-0.0295498	0.0600295	0.0160251	-0.0760546	0.0151524	0.0180348	-0.0331872	-0.0646026	0.0193757	0.045227	0.00281063	-0.0606867	0.0578761
P62814	0.0440929	-0.00421822	-0.0398747	-0.0799159	0.0466623	0.0332536	0.0828816	0.0342803	-0.117162	0.021772	-0.00759304	-0.0141789	-0.0356964	0.011766	0.0239304
P62821	0.047716	0.0388326	-0.0865486	0.0301107	-0.00200928	-0.0281014	0.00447405	0.0820495	-0.0865236	-0.0747938	0.0344148	0.040379	0.0101827	-0.072487	0.0623044
P62827	-0.0472622	0.012585	0.0346771	-0.0324056	-0.0321008	0.0645064	-0.0872752	0.0351887	0.0520865	-0.0537566	-0.0287237	0.0824803	-0.0480629	-0.0337829	0.0818457
P62830	-0.0716065	-0.00525181	0.0768583	0.0426439	-0.178763	0.136119	-0.213781	0.15277	0.0610107	-0.270457	0.125654	0.144803	-0.106449	-0.00203337	0.108482
P62842	-0.184185	-0.111728	0.295912	-0.0408429	-0.268099	0.308942	-0.224611	0.0227651	0.201846	-0.34142	0.0783849	0.263035	-0.153121	-0.0590255	0.212147
P62848	-0.0560895	0.0724866	-0.0163971	-0.0331228	-0.169241	0.202364	-0.176116	0.0197374	0.156379	-0.404388	0.128957	0.275431	-0.101003	-0.0661735	0.167177
P62852	-0.0873233	-0.0529354	0.140259	0.068116	-0.136809	0.0686934	-0.157022	0.0436506	0.113371	-0.372887	0.0990685	0.273818	-0.049436	-0.0581112	0.107547
P62858	-0.23004	0.077293	0.152747	-0.130357	-0.158011	0.288369	-0.21004	0.00562512	0.204415	-0.286911	0.043257	0.243654	NA	NA	NA
P62860	NA	NA	NA	-0.111223	-0.270555	0.381778	NA	NA	NA	NA	NA	NA	-0.205105	0.100277	0.104828
P62869	-0.0315371	-0.00814987	0.039687	-0.134878	0.0779475	0.0569307	-0.0540836	0.0467777	0.00730595	0.0413768	-0.0271765	-0.0142003	-0.00346954	-0.0215574	0.0250269
P62880	0.00691667	0.00120466	-0.00812133	0.0219842	0.12093	-0.142914	-0.0542378	0.0267713	0.0274665	0.0266128	0.0295882	-0.056201	-0.0131784	0.0522622	-0.0390838
P62889	-0.0627769	-0.0470026	0.10978	-0.0892361	-0.0762337	0.16547	-0.160141	0.131911	0.0282297	-0.354703	0.0222834	0.332419	-0.124167	0.0655171	0.0586503
P62897	-0.118656	0.0187157	0.0999403	-0.161127	0.115534	0.0455936	-0.0895443	0.0636878	0.0258564	-0.187063	0.102288	0.0847754	-0.0295	0.0786149	-0.0491149
P62908	-0.130318	-0.0183941	0.148712	-0.0256961	-0.133733	0.159429	-0.274163	0.109758	0.164405	-0.382387	0.111378	0.271009	-0.0987903	0.0002071	0.0985832
P62911	-0.211337	0.0216541	0.189683	0.00380858	-0.0739317	0.0701231	-0.28738	0.123561	0.163819	-0.301712	0.129347	0.172366	-0.084416	-0.0191053	0.103521
P62918	-0.0432864	-0.0624168	0.105703	0.0197998	-0.211032	0.191233	-0.208828	0.13064	0.0781876	-0.286552	0.0640267	0.222525	-0.0909888	-0.0375967	0.128586
P62944	0.0586985	-0.047137	-0.0115615	-0.0753055	0.0642371	0.0110684	0.00339377	0.0121521	-0.0155459	0.0164927	-0.0207174	0.00422471	0.0237609	-0.034028	0.0102671
P62960	0.00143582	0.0396008	-0.0410366	0.018178	-0.196707	0.178529	0.0021213	-0.147206	0.145085	-0.0748007	-0.0229895	0.0977902	-0.132743	0.0102893	0.122453
P62962	0.0679361	0.000920523	-0.0688566	0.0721135	-0.0309848	-0.0411286	0.0389638	0.0226808	-0.0616447	0.120513	-0.0371542	-0.0833588	0.012648	-0.0059236	-0.00672437
P62976	-0.0922137	0.0505172	0.0416964	-0.089823	-0.0675354	0.157358	0.0113193	-0.216647	0.205328	NA	NA	NA	-0.089515	-0.0116635	0.101179
P62978	NA	NA	NA	NA	NA	NA	NA	NA	NA	-0.136095	-0.0140604	0.150155	NA	NA	NA
P62994	0.0756355	-0.00207763	-0.0735578	-0.0188862	0.0565621	-0.0376759	0.0417619	0.0033434	-0.0451053	0.0791236	-0.0438057	-0.0353179	0.0144601	0.00325596	-0.0177161
P62996	0.0196928	0.0201673	-0.03986	NA	NA	NA	-0.0578187	0.102563	-0.0447444	-0.0857512	0.0250495	0.0607017	0.1204	-0.14664	0.0262399
P63001	-0.0324165	0.0221313	0.0102852	-0.0252272	-0.0283127	0.0535399	-0.0142547	0.0131272	0.00112751	0.0114156	0.119913	-0.131329	-0.0107855	-0.0465026	0.0572882
P63005	0.0611491	0.00594486	-0.0670939	0.00768014	0.00678661	-0.0144667	-0.0327067	-0.0072107	0.0399174	0.017697	0.017375	-0.035072	0.00368591	-0.0443217	0.0406357
P63017	-0.0609061	0.00633134	0.0545748	-0.0365963	-0.0343434	0.0709396	-0.0654731	0.00168794	0.0637852	-0.0648409	0.0240419	0.040799	-0.025316	-0.0223821	0.047698
P63024	0.0924549	-0.00544435	-0.0870106	-0.0184819	0.0755224	-0.0570405	0.0260974	0.0516713	-0.0777687	0.0665063	-0.0443835	-0.0221228	-0.0149249	0.0480345	-0.0331097
P63028	-0.0921977	0.0384008	0.0537969	-0.147928	0.0381506	0.109778	-0.104846	0.000289641	0.104556	-0.103328	-0.038595	0.141923	0.00268536	-0.00891149	0.00622613
P63037	-0.0906324	0.0058057	0.0848267	-0.0187813	-0.104827	0.123609	-0.0541891	-0.0159574	0.0701466	0.0073682	0.00371614	-0.0110843	-0.0497591	0.0228855	0.0268736
P63038	0.00530379	0.0436005	-0.0489042	0.0363989	0.0535358	-0.0899347	NA	NA	NA	NA	NA	NA	-0.00364355	-0.0308416	0.0344852
P63073	-0.0565146	0.0316037	0.0249109	-0.0738208	0.0362617	0.037559	-0.0669326	-0.0202666	0.0871992	-0.0552082	0.0423102	0.012898	0.0194258	0.0148153	-0.0342411
P63082	0.106063	-0.0599767	-0.046086	NA	NA	NA	NA	NA	NA	NA	NA	NA	NA	NA	NA
P63085	0.0674169	-0.0536705	-0.0137464	NA	NA	NA	-0.0356134	0.0230716	0.0125419	-0.02517	0.0218412	0.00332887	0.0573465	-0.0384209	-0.0189256
P63101	0.000433757	-0.00343055	0.00299679	0.0828697	-0.0310246	-0.0518451	0.0206122	0.0114092	-0.0320214	0.00329307	0.0642278	-0.0675209	0.0301169	-0.0694846	0.0393677
P63158	0.0371399	-0.073523	0.0363831	0.0386962	-0.0805361	0.0418399	-0.0569846	0.0727546	-0.01577	-0.0693552	-0.0339934	0.103349	0.0636779	-0.115118	0.0514398
P63166	-0.0404768	-0.0538124	0.0942892	-0.0442019	-0.0174305	0.0616324	-0.122613	0.148806	-0.0261926	-0.0678582	-0.0207459	0.0886041	0.00270892	0.0301138	-0.0328227
P63168	NA	NA	NA	NA	NA	NA	-0.0484561	0.0799833	-0.0315272	NA	NA	NA	NA	NA	NA
P63174	NA	NA	NA	-0.0564576	-0.294123	0.350581	NA	NA	NA	-0.181934	-0.134647	0.316581	-0.0628112	-0.0376061	0.100417
P63209	-0.0944543	0.0629998	0.0314545	NA	NA	NA	NA	NA	NA	NA	NA	NA	NA	NA	NA
P63213	NA	NA	NA	NA	NA	NA	NA	NA	NA	-0.253663	0.558949	-0.305286	0.113995	-0.125004	0.0110093
P63242	-0.0932362	0.00256075	0.0906754	-0.0177292	0.003525	0.0142043	0.0947184	-0.11411	0.0193912	-0.0826538	0.0719574	0.0106964	-0.0573761	-0.0164764	0.0738525
P63254	-0.153298	0.0176315	0.135666	0.139649	-0.41685	0.277201	-0.3472	0.417045	-0.0698452	-0.481278	0.320967	0.16031	0.0641698	0.0320043	-0.0961741
P63321	NA	NA	NA	-0.0155824	-0.00374033	0.0193227	-0.0565529	0.0916636	-0.0351107	0.0983368	-0.0209735	-0.0773634	NA	NA	NA
P63323	-0.167084	-0.0305018	0.197586	-0.150322	-0.0463136	0.196636	-0.268613	0.142852	0.125762	-0.397005	0.0687218	0.328283	-0.145588	-0.0294498	0.175038
P63325	-0.126927	0.00140942	0.125518	-0.053258	-0.111989	0.165247	-0.198836	0.0902126	0.108624	-0.213986	0.0413907	0.172595	-0.0825991	-0.0495884	0.132187
P63328	0.0776352	0.0091865	-0.0868217	0.140281	-0.15648	0.0161985	-0.00721726	0.0488053	-0.041588	0.0627285	-0.0556272	-0.0071013	-0.0330656	0.00868142	0.0243842
P63330	0.112396	-0.0672334	-0.0451626	0.0107988	-0.0236208	0.012822	NA	NA	NA	NA	NA	NA	NA	NA	NA
P67778	-0.0125723	0.0324758	-0.0199035	0.0154875	0.0761735	-0.091661	-0.0366654	0.025337	0.0113284	-0.149533	0.0364783	0.113055	0.0119286	-0.0061647	-0.00632431
P67871	NA	NA	NA	NA	NA	NA	NA	NA	NA	-0.0582373	0.0311551	0.0270822	0.00414667	-0.0571336	0.0529869
P67984	-0.189549	0.0725409	0.117008	NA	NA	NA	NA	NA	NA	-0.460574	0.149021	0.311553	NA	NA	NA
P68033	NA	NA	NA	0.0794075	-0.163191	0.0837836	NA	NA	NA	NA	NA	NA	NA	NA	NA
P68037	-0.0326885	0.00327727	0.0294112	-0.0669272	-0.00711475	0.074042	0.014872	-0.0510651	0.036193	-0.0558138	-0.0170769	0.0728907	-0.0448162	-0.0125489	0.057365
P68040	-0.155147	-0.012992	0.168139	-0.185011	-0.0492407	0.234252	-0.303168	0.104429	0.198739	-0.221012	0.0713158	0.149696	-0.0736653	-0.0615079	0.135173
P68134	NA	NA	NA	NA	NA	NA	NA	NA	NA	-0.0125803	0.11443	-0.101849	NA	NA	NA
P68180	0.180192	-0.040452	-0.13974	0.0103463	-0.0726161	0.0622698	0.100337	-0.0162211	-0.0841157	0.047252	0.0805876	-0.12784	0.121267	-0.182439	0.0611717
P68254	0.00463768	-0.00242403	-0.00221365	0.00754171	0.0211334	-0.0286751	-0.0378168	-0.0300026	0.0678194	0.0232783	0.0154918	-0.0387702	0.015377	-0.0418006	0.0264236
P68368	-0.0133833	0.0256558	-0.0122725	-0.101921	0.104554	-0.00263299	-0.0815469	0.207433	-0.125886	-0.0858497	0.134146	-0.0482967	-0.0680394	0.0306877	0.0373517
P68372	0.012057	0.0496884	-0.0617454	-0.0275728	-0.0524887	0.0800615	-0.0282402	-0.0437986	0.0720387	-0.0132115	-0.0314164	0.0446279	-0.0452235	0.0344833	0.0107402
P68404	0.138753	-0.0338962	-0.104856	0.14246	-0.239289	0.0968286	0.0613044	-0.0878246	0.0265202	0.197309	-0.0886284	-0.10868	0.0576568	-0.104196	0.0465392
P68433	-0.087341	-0.0397801	0.127121	NA	NA	NA	NA	NA	NA	-0.150224	0.00245259	0.147772	-0.100494	-0.0248766	0.125371
P68510	-0.0109814	-0.0360208	0.0470022	-0.0201188	0.0239801	-0.00386129	-0.013387	0.0992331	-0.0858461	0.0411198	0.0155132	-0.056633	-0.0395415	-0.0173952	0.0569367
P69060	NA	NA	NA	NA	NA	NA	NA	NA	NA	-0.0753954	0.0447529	0.0306425	0.123568	-0.0835374	-0.0400302
P69893	-0.0768225	-0.0237659	0.100588	-0.0941516	0.0206105	0.0735411	-0.0488652	-0.00347054	0.0523358	-0.088014	-0.0598081	0.147822	-0.0531203	-0.0552825	0.108403
P70168	0.0376059	0.0138265	-0.0514324	-0.00865663	0.0620742	-0.0534176	0.0264145	0.0199071	-0.0463216	-0.0206342	0.0553311	-0.0346969	0.0752083	0.0287148	-0.103923
P70195	NA	NA	NA	0.0248774	0.0176718	-0.0425492	0.0638227	-0.0449604	-0.0188623	-0.116179	0.145494	-0.0293154	NA	NA	NA
P70248	0.112471	0.0358985	-0.14837	0.0381139	0.011309	-0.0494229	0.0139335	0.0362238	-0.0501574	0.119697	0.0030237	-0.122721	-0.0330824	0.0348476	-0.00176523
P70280	NA	NA	NA	NA	NA	NA	NA	NA	NA	NA	NA	NA	0.00951112	-0.0111235	0.00161236
P70302	NA	NA	NA	-0.0678243	0.103024	-0.0351997	NA	NA	NA	NA	NA	NA	NA	NA	NA
P70315	0.0704946	-0.0123727	-0.0581219	0.0762402	-0.0791082	0.00286794	0.0203588	-0.00524636	-0.0151124	0.0243018	0.0203776	-0.0446795	0.0332086	-0.0348243	0.00161569
P70318	NA	NA	NA	0.0265099	-0.0498624	0.0233525	NA	NA	NA	NA	NA	NA	NA	NA	NA
P70333	NA	NA	NA	0.186717	-0.126111	-0.0606069	NA	NA	NA	-0.0489498	0.0389037	0.0100461	NA	NA	NA
P70349	-0.0235523	-0.00949318	0.0330455	0.13731	-0.11695	-0.0203598	0.0284618	0.0583464	-0.0868082	-0.0931138	0.090141	0.00297279	-0.00842839	-0.0622746	0.070703
P70372	-0.00640818	-0.0165573	0.0229655	0.0779968	-0.0823018	0.00430503	-0.00435178	0.0877117	-0.0833599	-0.0903927	0.0774073	0.0129854	0.00293745	-0.0450788	0.0421414
P70398	0.0853754	0.00281366	-0.088189	-0.0588819	-0.00350069	0.0623826	0.0490824	0.0412301	-0.0903125	0.00272612	-0.0326471	0.0299209	0.0420432	-0.0120958	-0.0299474
P70460	0.034332	-0.0286461	-0.00568587	-0.0157287	0.00311301	0.0126157	0.00339636	-0.0275448	0.0241484	0.298664	-0.211895	-0.0867685	0.0139763	-0.037271	0.0232948
P70470	0.201017	0.00891616	-0.209933	-0.0811115	-0.00857032	0.0896819	0.0254934	-0.0367945	0.0113011	0.0478926	-0.00176539	-0.0461272	NA	NA	NA
P70483	NA	NA	NA	NA	NA	NA	0.00828159	-0.0687432	0.0604616	NA	NA	NA	NA	NA	NA
P70500	NA	NA	NA	NA	NA	NA	NA	NA	NA	0.043784	-0.00446163	-0.0393223	0.162484	-0.0234402	-0.139044
P70581	NA	NA	NA	NA	NA	NA	NA	NA	NA	-0.276839	0.166262	0.110577	NA	NA	NA
P70600	0.0671961	0.0214057	-0.0886018	0.120882	0.0209875	-0.14187	0.0662366	-0.037566	-0.0286705	0.103202	-0.0366633	-0.066539	0.0463151	0.0130866	-0.0594016
P70615	0.0446414	-0.138878	0.0942366	0.154689	-0.122432	-0.0322563	0.0461491	0.102706	-0.148855	0.068973	-0.0232054	-0.0457676	-0.0279898	0.0358074	-0.00781767
P70619	-0.0144204	-0.0158769	0.0302972	-0.0813752	-0.0226758	0.104051	0.167204	-0.0770734	-0.0901303	0.0122978	0.0300571	-0.0423549	0.113584	-0.0238969	-0.0896871
P70645	0.0145727	-0.0137167	-0.000855954	-0.0574166	0.0154113	0.0420053	-0.00756661	0.0117031	-0.00413648	0.0247674	0.033351	-0.0581184	0.00608778	-0.0032728	-0.00281497
P70665	NA	NA	NA	0.107171	-0.0462092	-0.0609614	NA	NA	NA	NA	NA	NA	NA	NA	NA
P70704	0.0116225	0.0116651	-0.0232875	-0.112208	0.0928081	0.0194001	NA	NA	NA	0.111741	-0.0270695	-0.0846718	-0.0380242	0.0237828	0.0142414
P70709	NA	NA	NA	NA	NA	NA	0.624904	-0.0949795	-0.529924	1.08644	-0.383647	-0.702798	NA	NA	NA
P80067	0.101964	-0.041115	-0.0608489	0.117597	0.076599	-0.194196	0.062112	0.0422867	-0.104399	0.0428826	0.0850914	-0.127974	0.0183259	0.0269831	-0.045309
P80254	-0.0699867	-0.131533	0.201519	NA	NA	NA	NA	NA	NA	NA	NA	NA	NA	NA	NA
P80313	0.0107344	0.0100728	-0.0208071	-0.0340318	-0.0137745	0.0478063	-0.0421411	0.0506268	-0.00848576	-0.129586	0.0960561	0.0335303	0.0261293	-0.0507647	0.0246354
P80315	NA	NA	NA	NA	NA	NA	-0.0591409	0.0463248	0.0128161	-0.0141999	0.0115624	0.00263752	0.0738237	-0.0378573	-0.0359664
P80317	0.00971985	-0.0381061	0.0283862	0.0244109	-0.0354719	0.011061	-0.0583131	0.0868586	-0.0285455	-0.0845532	0.0349362	0.0496169	0.0362213	-0.0498561	0.0136348
P80318	NA	NA	NA	0.0449138	-0.0411043	-0.00380956	NA	NA	NA	-0.0446895	0.0141253	0.0305642	0.0384384	-0.028591	-0.00984738
P80386	NA	NA	NA	NA	NA	NA	NA	NA	NA	NA	NA	NA	0.123814	0.0574402	-0.181255
P80431	-0.0482494	0.0237683	0.0244811	-0.0494064	0.123596	-0.0741899	NA	NA	NA	-0.0732798	0.0123358	0.0609439	NA	NA	NA
P81155	-0.013948	0.0482026	-0.0342545	0.0867217	-0.00606225	-0.0806594	0.0322825	-0.0188607	-0.0134218	-0.0348644	0.0365642	-0.00169976	-0.00776745	-0.00702092	0.0147884
P81178	NA	NA	NA	-0.0556155	-0.02461	0.0802255	NA	NA	NA	NA	NA	NA	-0.140776	0.0938264	0.0469498
P81269	NA	NA	NA	0.0683761	-0.0135374	-0.0548387	NA	NA	NA	NA	NA	NA	NA	NA	NA
P81718	0.0218795	-0.0500147	0.0281352	-0.056543	0.101414	-0.0448712	0.0399956	-0.0486418	0.00864622	0.0652379	-0.0512502	-0.0139877	-0.0681532	0.0566437	0.0115094
P81795	-0.100691	0.00414362	0.0965474	0.0398939	-0.0964819	0.056588	-0.0911946	-0.0127293	0.103924	-0.0749405	0.00175306	0.0731875	-0.00847898	-0.0537285	0.0622075
P81799	0.0223426	0.0174948	-0.0398374	-0.048011	0.177117	-0.129106	0.0479452	-0.114263	0.0663181	0.074509	-0.0176187	-0.0568903	-0.0799807	-0.0193852	0.0993659
P82450	0.0601356	-0.020969	-0.0391667	NA	NA	NA	NA	NA	NA	NA	NA	NA	NA	NA	NA
P82808	NA	NA	NA	NA	NA	NA	NA	NA	NA	-0.0258069	0.140904	-0.115098	NA	NA	NA
P82995	-0.0641633	-0.0312095	0.0953728	-0.049342	-0.000855244	0.0501972	-0.0809685	-0.0364197	0.117388	-0.0494812	-0.0185519	0.0680331	-0.0300318	-0.0154616	0.0454935
P83006	0.0268251	0.0089315	-0.0357566	0.089046	-0.0550334	-0.0340126	NA	NA	NA	0.0779823	0.0287699	-0.106752	NA	NA	NA
P83882	-0.0924506	-0.148647	0.241097	-0.081241	-0.0802586	0.1615	NA	NA	NA	-0.249044	0.0482391	0.200805	NA	NA	NA
P83917	0.0399555	-0.0891916	0.0492361	NA	NA	NA	NA	NA	NA	-0.059959	0.0123278	0.0476312	0.221687	-0.108407	-0.11328
P83940	0.049675	-0.038843	-0.010832	0.0104783	0.0392074	-0.0496857	0.0293402	-0.0742076	0.0448674	-0.0509424	0.0680619	-0.0171196	-0.141765	0.0705016	0.0712634
P84084	-0.031393	-0.0286045	0.0599975	0.0260683	-0.0429675	0.0168992	-0.0217804	-0.0258323	0.0476127	-0.00538099	0.0593968	-0.0540158	0.107426	-0.274756	0.16733
P84089	0.0657261	0.0153118	-0.0810379	0.0974723	-0.114839	0.0173667	-0.0119016	0.0557958	-0.0438942	-0.118364	0.0387061	0.079658	NA	NA	NA
P84091	0.0244288	-0.00637398	-0.0180548	-0.0770884	0.0820739	-0.00498546	0.066875	0.00129096	-0.068166	-0.000768665	0.0647264	-0.0639578	-0.00106563	-0.0215208	0.0225864
P84097	0.0598012	-0.0104659	-0.0493353	0.0715491	0.0285792	-0.100128	0.0423779	0.0104716	-0.0528496	0.0678634	0.0347183	-0.102582	-0.0223135	0.0840759	-0.0617623
P84099	-0.129228	-0.0252642	0.154492	0.0139078	-0.143295	0.129387	-0.333007	0.190483	0.142524	-0.295237	0.0768971	0.21834	-0.0661389	-0.10193	0.168069
P84104	0.0165272	-0.034789	0.0182618	0.0976513	-0.134644	0.0369923	0.0500256	-0.129603	0.0795775	-0.0825679	-0.069092	0.15166	-0.00459286	0.00434809	0.000244774
P84228	NA	NA	NA	-0.215808	0.134236	0.0815722	0.0452871	0.0678942	-0.113181	NA	NA	NA	NA	NA	NA
P84244	NA	NA	NA	0.168576	-0.134796	-0.03378	-0.0620683	-0.0716024	0.133671	NA	NA	NA	NA	NA	NA
P84586	NA	NA	NA	0.0493749	-0.0930629	0.043688	NA	NA	NA	NA	NA	NA	NA	NA	NA
P84817	0.109007	0.0712028	-0.18021	-0.0894302	0.0358986	0.0535316	-0.0619461	0.0627203	-0.000774185	0.00740475	-0.107565	0.10016	0.0300035	0.029534	-0.0595376
P84903	0.0324764	-0.00605022	-0.0264262	NA	NA	NA	0.142736	-0.167663	0.0249276	0.116442	-0.124698	0.00825565	0.0239575	-0.0554156	0.0314581
P85834	-0.0389779	0.0566863	-0.0177084	0.0549729	0.0108456	-0.0658184	-0.0397557	-0.0226826	0.0624383	-0.0641077	0.0623493	0.00175843	0.0774856	-0.0628782	-0.0146074
P85968	0.0445258	-0.0092579	-0.0352679	0.063651	-0.0565712	-0.00707984	0.0722922	-0.00811234	-0.0641798	0.102526	-0.0557837	-0.0467419	-0.0251072	0.0125739	0.0125333
P85970	0.097323	-0.0903279	-0.00699508	-0.0128641	0.0032322	0.00963191	0.0171077	0.0354484	-0.0525562	0.00577757	0.0649759	-0.0680461	0.00114938	0.0263387	-0.0274881
P85971	0.121648	-0.0893211	-0.0323264	0.0507408	-0.0914904	0.0407496	0.0725362	0.0103595	-0.0828957	0.0286989	-0.0120316	-0.0166673	-0.00843721	0.00524135	0.00319586
P85972	0.0187751	-0.0493466	0.0305715	-0.0441006	0.0112644	0.0328362	-0.010401	-0.0189809	0.0293819	0.0714458	0.012235	-0.0836809	-0.030796	0.0159052	0.0148909
P85973	-0.0208269	0.0547096	-0.0338827	-0.0621919	-0.0656916	0.127884	-0.0710835	0.106802	-0.0357188	-0.0579075	0.125715	-0.0678078	0.0460715	-0.030913	-0.0151584
P86172	0.0682884	-0.139233	0.0709445	0.00147611	0.0717602	-0.0732364	-0.00590448	0.0344232	-0.0285187	NA	NA	NA	0.0728919	0.00470177	-0.0775936
P86182	0.0607839	0.0686641	-0.129448	0.097954	-0.0398403	-0.0581136	0.108411	-0.0511607	-0.0572506	NA	NA	NA	NA	NA	NA
P86198	NA	NA	NA	NA	NA	NA	-0.0966548	0.210719	-0.114064	-0.283161	0.132228	0.150933	-0.0512744	0.0682858	-0.0170114
P86217	NA	NA	NA	NA	NA	NA	NA	NA	NA	-0.223846	0.0959852	0.127861	NA	NA	NA
P86219	0.0905608	-0.00308168	-0.0874791	0.0015107	0.0513728	-0.0528835	0.0500879	0.105222	-0.15531	NA	NA	NA	NA	NA	NA
P86252	0.0318393	-0.00017731	-0.031662	0.104256	-0.0518194	-0.0524364	0.189245	-0.00751313	-0.181732	NA	NA	NA	0.143399	-0.0824275	-0.0609713
P97310	-0.0806467	-0.0974517	0.178098	-0.016296	-0.0908373	0.107133	-0.106563	-0.00534283	0.111905	-0.142395	0.0671878	0.0752076	-0.0610302	0.00202449	0.0590057
P97311	-0.166756	-0.0270462	0.193802	-0.0700642	-0.0917425	0.161807	-0.0724448	0.0508439	0.0216009	-0.11002	0.0505919	0.0594278	-0.0298439	-0.0512674	0.0811113
P97369	0.0692221	-0.0793302	0.0101081	-0.0958764	0.123593	-0.0277166	0.0472278	-0.0070846	-0.0401432	0.0422485	-0.0053688	-0.0368797	-0.0581535	0.0439312	0.0142224
P97376	0.0654805	0.111579	-0.17706	0.114766	-0.0423738	-0.0723924	NA	NA	NA	NA	NA	NA	NA	NA	NA
P97384	0.0728411	0.0337889	-0.10663	0.0111685	0.0513675	-0.0625359	0.0440935	-0.00740468	-0.0366888	0.102558	0.0380586	-0.140617	0.0271576	0.0453437	-0.0725013
P97412	0.00506345	0.0370211	-0.0420845	-0.0816399	0.0453988	0.0362412	NA	NA	NA	-0.038978	-0.0356882	0.0746661	-0.0208299	0.00915721	0.0116727
P97504	0.00803241	0.0421848	-0.0502173	-0.116271	0.23163	-0.11536	-0.149747	0.0691666	0.0805804	NA	NA	NA	NA	NA	NA
P97520	0.0340383	0.0819863	-0.116025	-0.0385946	0.0775724	-0.0389778	0.0436688	0.0832023	-0.126871	0.0620869	0.0273254	-0.0894123	0.0485747	-0.0781505	0.0295758
P97532	0.236464	-0.111035	-0.12543	0.0644129	0.0858855	-0.150298	0.0349029	0.0786371	-0.11354	0.044447	-0.00555549	-0.0388916	NA	NA	NA
P97536	0.103297	0.00565431	-0.108951	0.0174403	-0.00860362	-0.00883668	-0.0269683	0.0863483	-0.05938	0.0108576	0.0872558	-0.0981133	0.0663633	-0.0394756	-0.0268877
P97571	0.0498676	0.0100181	-0.0598856	-0.00358608	0.0256599	-0.0220738	0.0739177	-0.0652177	-0.00870002	0.121808	-0.0633177	-0.05849	-0.0269652	0.0640028	-0.0370375
P97573	0.0454382	-0.0366668	-0.0087714	0.055708	-0.0108611	-0.0448469	0.00456715	0.0326752	-0.0372424	0.022781	0.0198316	-0.0426125	0.0284081	0.0165301	-0.0449382
P97576	NA	NA	NA	0.104065	-0.120683	0.0166171	NA	NA	NA	NA	NA	NA	NA	NA	NA
P97584	0.0155909	-0.0279445	0.0123536	-0.202831	-0.212152	0.414983	-0.303282	-0.0782566	0.381538	0.317129	-0.486367	0.169238	-1.14438	0.243664	0.900719
P97594	0.83167	-0.863085	0.0314154	1.56003	-1.70568	0.145642	0.214463	0.545539	-0.760002	-0.130508	-0.135586	0.266093	0.690095	-0.667537	-0.0225577
P97629	0.0353868	0.0206277	-0.0560144	0.0834357	0.0816014	-0.165037	NA	NA	NA	0.0233804	0.0417945	-0.0651748	0.0407138	0.137168	-0.177882
P97687	0.448852	-0.278409	-0.170443	0.506087	-0.230213	-0.275874	NA	NA	NA	0.394924	0.141688	-0.536612	0.155847	-0.0730756	-0.0827717
P97697	0.0948912	-0.0600173	-0.0348739	0.0313983	-0.0357689	0.0043706	0.0908526	-0.0143368	-0.0765158	0.135053	-0.0403473	-0.0947055	0.0773178	-0.0904849	0.0131671
P97700	NA	NA	NA	0.0232069	0.0514546	-0.0746615	NA	NA	NA	NA	NA	NA	0.0766129	-0.0341684	-0.0424444
P97710	0.15498	0.016066	-0.171046	0.0660075	0.0468782	-0.112886	0.15946	-0.0351322	-0.124328	0.22181	-0.0574312	-0.164379	0.0353637	0.0270863	-0.06245
P97814	-0.00409352	0.0497809	-0.0456874	0.0531441	0.0490733	-0.102217	0.0529641	0.023106	-0.0760702	0.10437	0.0538171	-0.158187	-0.0219717	0.0208166	0.00115514
P97820	NA	NA	NA	-0.291747	0.120517	0.171231	NA	NA	NA	NA	NA	NA	0.0181729	-0.0191122	0.000939301
P97829	-0.0275732	0.00144681	0.0261264	-0.0730478	0.206393	-0.133345	0.081218	0.021811	-0.103029	0.0521466	0.199375	-0.251521	0.0543778	0.129786	-0.184164
P97834	NA	NA	NA	NA	NA	NA	NA	NA	NA	-0.0627938	0.0956884	-0.0328947	NA	NA	NA
P97840	NA	NA	NA	NA	NA	NA	-0.144549	-0.0945706	0.23912	-0.297385	-0.0348218	0.332207	-0.0112375	-0.0563574	0.0675949
P97852	-0.0634153	0.1282	-0.0647852	-0.108235	0.0054837	0.102751	-0.109586	0.0640531	0.045533	-0.112572	0.0661282	0.0464437	0.0785086	-0.0617032	-0.0168054
P97855	NA	NA	NA	-0.109376	-0.00725015	0.116626	NA	NA	NA	-0.0504552	0.245601	-0.195146	-0.0556462	0.0867046	-0.0310585
P97878	0.0330794	-0.00710878	-0.0259706	NA	NA	NA	NA	NA	NA	NA	NA	NA	NA	NA	NA
P97891	0.0422328	-0.0420704	-0.000162407	0.0439922	-0.0647147	0.0207225	-0.0902296	0.108738	-0.0185084	-0.0938823	0.0286628	0.0652195	0.078652	-0.091859	0.013207
P97930	NA	NA	NA	NA	NA	NA	NA	NA	NA	0.140965	-0.324423	0.183458	NA	NA	NA
P98197	0.065209	0.0593471	-0.124556	NA	NA	NA	NA	NA	NA	NA	NA	NA	0.0243248	0.0542766	-0.0786013
P99026	NA	NA	NA	-0.0270823	0.0804597	-0.0533774	NA	NA	NA	NA	NA	NA	NA	NA	NA
Q00438	NA	NA	NA	0.027372	-0.0881317	0.0607597	-0.0454826	0.0577304	-0.0122479	0.000319887	-0.00454121	0.00422132	NA	NA	NA
Q00899	0.180057	-0.159276	-0.0207809	NA	NA	NA	NA	NA	NA	NA	NA	NA	NA	NA	NA
Q00PI9	0.0173626	0.0491705	-0.0665331	0.0818085	-0.0296805	-0.052128	-0.00473665	0.0820906	-0.077354	-0.0724267	0.0745086	-0.00208198	-0.00468124	0.00670098	-0.00201974
Q01205	NA	NA	NA	NA	NA	NA	NA	NA	NA	-0.0367038	0.101225	-0.0645209	-0.0140473	0.0101391	0.00390826
Q01405	NA	NA	NA	-0.162621	0.151195	0.011426	NA	NA	NA	NA	NA	NA	0.0837424	0.0382321	-0.121974
Q01460	0.0795739	-0.00270676	-0.0768672	0.0327824	0.0153641	-0.0481465	0.0281049	0.0660869	-0.0941918	-0.0413133	0.0513944	-0.0100811	NA	NA	NA
Q01730	-0.0421237	0.0128476	0.0292761	-0.0110766	0.108051	-0.0969743	0.0212142	0.00947092	-0.0306851	0.0293583	0.0271503	-0.0565086	-0.0425962	0.0522044	-0.00960819
Q02357	NA	NA	NA	NA	NA	NA	NA	NA	NA	0.659913	0.278415	-0.938328	NA	NA	NA
Q02589	0.0644467	-0.0179184	-0.0465284	0.0613859	-0.046986	-0.0143998	NA	NA	NA	-0.163287	0.24558	-0.0822934	-0.0455658	-0.0561942	0.10176
Q02759	NA	NA	NA	NA	NA	NA	0.122921	0.409014	-0.531935	0.536919	-0.331932	-0.204987	1.14221	-0.050523	-1.09169
Q02765	NA	NA	NA	NA	NA	NA	NA	NA	NA	-0.320831	0.143533	0.177298	NA	NA	NA
Q02819	NA	NA	NA	NA	NA	NA	NA	NA	NA	-0.0286177	-0.0854076	0.114025	NA	NA	NA
Q02874	0.0881702	0.000855074	-0.0890253	0.124276	-0.0950472	-0.0292288	-0.0294616	0.0928623	-0.0634007	-0.101863	0.0435455	0.0583179	0.00275969	-0.0213784	0.0186187
Q03267	NA	NA	NA	0.00804803	-0.126897	0.118849	NA	NA	NA	NA	NA	NA	NA	NA	NA
Q03344	-0.115703	0.0690971	0.0466059	-0.053056	0.171716	-0.11866	-0.0724487	0.103225	-0.0307765	-0.0816068	0.0520627	0.0295442	0.0134882	-0.0436098	0.0301216
Q03958	0.0716499	-0.153704	0.0820542	-0.0360941	-0.072983	0.109077	0.0285976	0.0212239	-0.0498215	-0.119643	0.0611208	0.058522	-0.0705418	0.10781	-0.0372678
Q04207	NA	NA	NA	NA	NA	NA	NA	NA	NA	-0.0367359	0.0317858	0.00495006	NA	NA	NA
Q04462	0.0391022	-0.0374688	-0.00163346	-0.0554656	-0.0479008	0.103366	0.0689774	0.0396789	-0.108656	-0.14181	0.125481	0.0163288	0.0122459	-0.0388678	0.0266219
Q05144	-0.0603792	-0.0518368	0.112216	-0.0940546	0.214875	-0.120821	-0.0242287	0.0613556	-0.0371269	0.0530135	0.0508596	-0.103873	-0.0488218	0.0980887	-0.0492669
Q05175	0.135865	-0.139342	0.0034764	0.0212587	0.0513914	-0.0726501	0.151955	-0.337823	0.185867	0.103365	0.146622	-0.249987	0.00834503	0.208327	-0.216672
Q05186	NA	NA	NA	0.299801	-0.231412	-0.0683893	NA	NA	NA	0.198587	0.0581377	-0.256725	NA	NA	NA
Q05982	-0.0357028	0.0931408	-0.057438	-0.139764	0.00718815	0.132576	-0.0911431	0.110311	-0.0191677	0.00888256	-0.105867	0.0969841	0.0144135	-0.117519	0.103106
Q06138	-0.0423825	0.0367831	0.00559948	-0.218577	0.0533907	0.165186	-0.0856586	-0.054059	0.139718	-0.0443149	-0.0587046	0.10302	-0.0621443	0.000516916	0.0616274
Q06518	-0.882024	1.61948	-0.737452	NA	NA	NA	NA	NA	NA	NA	NA	NA	NA	NA	NA
Q06606	0.80675	-0.783007	-0.0237428	1.27411	-1.03316	-0.240957	0.226232	0.449945	-0.676177	-0.172961	-0.265969	0.43893	0.786373	-0.748594	-0.0377792
Q06647	-0.0136573	0.0380678	-0.0244105	0.0978435	-0.0118216	-0.0860219	-0.0618938	0.0880619	-0.0261681	-0.143457	0.0767257	0.0667316	-0.0275206	0.023334	0.0041866
Q07014	0.0498351	0.0532327	-0.103068	0.0167736	0.0642525	-0.0810261	0.0907838	0.0247694	-0.115553	-0.0882417	0.0922265	-0.00398478	0.215157	-0.051666	-0.163491
Q07647	-0.00955861	0.122307	-0.112749	-0.0855695	0.206372	-0.120802	0.0623167	0.00564907	-0.0679658	0.110859	-0.0790596	-0.0317997	0.0713011	0.035783	-0.107084
Q07936	0.0255213	0.00290268	-0.0284239	-0.0515271	-0.0639021	0.115429	-0.0951952	0.0898355	0.00535977	0.00333234	0.0531891	-0.0565214	-0.0342711	0.0551288	-0.0208577
Q07969	NA	NA	NA	NA	NA	NA	NA	NA	NA	NA	NA	NA	0.265572	0.0777521	-0.343325
Q08024	NA	NA	NA	NA	NA	NA	0.149952	-0.0862429	-0.0637095	NA	NA	NA	NA	NA	NA
Q08093	-0.0438189	-0.00756437	0.0513833	-0.0476156	0.0344434	0.0131722	-0.0405361	0.0168232	0.0237129	0.0662369	-0.0286441	-0.0375929	-0.0739527	0.0242061	0.0497466
Q08163	0.0195951	-0.0674495	0.0478544	0.0166401	-0.00850232	-0.00813774	-0.0657096	0.0783687	-0.0126591	0.0800009	0.0065329	-0.0865338	-0.0190768	0.0413986	-0.0223218
Q08849	0.0806565	-0.190554	0.109897	0.218558	-0.194111	-0.0244469	0.094939	-0.05795	-0.036989	0.339333	-0.115465	-0.223868	0.0529829	-0.0059441	-0.0470388
Q08943	-0.0478158	0.0360341	0.0117817	-0.00568904	-0.0779445	0.0836336	-0.198374	0.212683	-0.0143085	-0.321761	0.0702605	0.251501	-0.000889853	-0.00843926	0.00932912
Q09014	0.0179704	-0.0276212	0.00965081	0.0175673	0.0248934	-0.0424607	0.0112294	-0.0253548	0.0141254	0.0459371	-0.0171351	-0.028802	0.0312946	0.039596	-0.0708906
Q0ZHH6	NA	NA	NA	-0.0135231	-0.00388239	0.0174055	0.0516309	0.0246542	-0.0762851	-0.157321	0.0917469	0.0655746	0.0554073	-0.198744	0.143336
Q10728	0.028419	-0.0442856	0.0158666	0.108359	-0.081719	-0.02664	0.0137886	-0.00883379	-0.0049548	0.0549528	-0.0208324	-0.0341204	-0.00936975	-0.0525977	0.0619675
Q10743	NA	NA	NA	NA	NA	NA	NA	NA	NA	NA	NA	NA	-0.0769434	0.0293811	0.0475623
Q10758	0.34849	0.092759	-0.441249	NA	NA	NA	-0.430256	0.848302	-0.418046	NA	NA	NA	NA	NA	NA
Q11011	0.0359859	0.0385045	-0.0744904	-0.0197684	0.0511859	-0.0314174	0.0615905	-0.0156634	-0.0459271	0.0381434	0.00803649	-0.0461799	0.00198825	0.0189095	-0.0208978
Q1AAU6	0.0160032	-0.0360564	0.0200531	-0.150948	0.0326397	0.118309	0.0236207	-0.106272	0.0826515	NA	NA	NA	NA	NA	NA
Q1JU68	-0.0785849	0.0744603	0.00412462	-0.0655435	0.025983	0.0395605	-0.105752	0.0296051	0.0761467	-0.123279	-0.0201086	0.143388	-0.0176357	-0.0243606	0.0419963
Q1KSC7	-0.120567	-0.0120662	0.132633	0.0344556	-0.150563	0.116107	-0.213248	0.103943	0.109305	-0.247083	0.0354221	0.211661	-0.130461	-0.0640911	0.194552
Q27W01	-0.0463928	0.111471	-0.0650785	NA	NA	NA	-0.059663	0.116402	-0.056739	-0.16486	0.134146	0.030714	NA	NA	NA
Q2LAP6	0.0914354	0.0109214	-0.102357	0.121953	-0.0692764	-0.0526767	0.0614725	0.0042629	-0.0657354	0.0744639	0.0636973	-0.138161	0.0244738	-0.00351619	-0.0209576
Q2LC84	-0.126198	-0.0207239	0.146922	NA	NA	NA	NA	NA	NA	NA	NA	NA	0.00748862	0.0252868	-0.0327754
Q2PQA9	-0.016968	-0.0235902	0.0405582	-0.0415352	0.0250426	0.0164926	0.0274304	0.0280809	-0.0555113	0.0740596	0.00115974	-0.0752194	0.0323505	-0.0661356	0.0337851
Q2TL32	0.000569117	0.0103941	-0.0109633	NA	NA	NA	NA	NA	NA	0.0643756	0.016608	-0.0768316	NA	NA	NA
Q32KJ6	0.0876921	0.0520562	-0.139748	-0.0159817	0.0443485	-0.0283668	0.0401666	-0.0038822	-0.0362844	0.165761	0.0152517	-0.181013	-0.0719275	0.0606403	0.0112872
Q32PX2	NA	NA	NA	-0.125342	-0.0475817	0.172924	NA	NA	NA	NA	NA	NA	NA	NA	NA
Q32PX7	0.0059424	-0.0527632	0.0468208	0.0641182	-0.111531	0.0474131	-0.0738988	0.140194	-0.0662951	-0.111227	0.0440983	0.0671289	0.0421854	-0.0640046	0.0218192
Q32PZ3	NA	NA	NA	-0.14585	0.0753544	0.0704957	NA	NA	NA	NA	NA	NA	NA	NA	NA
Q37476	NA	NA	NA	-0.8406	-0.319346	1.15995	-0.86681	0.485583	0.381227	NA	NA	NA	NA	NA	NA
Q3B7D5	0.0875737	-0.0383332	-0.0492405	-0.0244213	0.0551465	-0.0307253	0.0331491	-0.0675156	0.0343664	0.0310826	-0.047808	0.0167254	0.0170727	-0.0278477	0.010775
Q3B7T9	0.257681	-0.0678994	-0.189782	NA	NA	NA	0.378676	-0.149912	-0.228764	0.317991	-0.0287095	-0.289281	0.114484	-0.0446241	-0.0698594
Q3B7Z2	0.0679017	-0.0129256	-0.0549761	-0.00158663	-0.108407	0.109993	NA	NA	NA	0.0499482	-0.0335645	-0.0163837	0.0545989	-0.0515853	-0.00301359
Q3B8Q1	-0.0665758	-0.0448402	0.111416	0.194568	-0.204173	0.00960489	NA	NA	NA	-0.469099	0.194976	0.274123	0.0180105	-0.106552	0.0885411
Q3B8Q2	0.0307182	0.046947	-0.0776652	0.100454	-0.132122	0.0316686	-0.0764639	-0.00483668	0.0813005	-0.109739	0.0314853	0.078254	0.027012	-0.0704758	0.0434638
Q3KR86	-0.0580393	0.105315	-0.0472754	0.0879623	-0.0190824	-0.0688799	0.0646232	-0.013494	-0.0511293	-0.102411	0.0624922	0.0399187	-0.000974405	-0.024737	0.0257114
Q3KRD5	-0.111761	-0.010017	0.121778	-0.0544148	0.00642154	0.0479933	NA	NA	NA	-0.0996979	0.0543062	0.0453916	0.116716	-0.0116688	-0.105047
Q3KRE0	NA	NA	NA	0.116942	-0.0174462	-0.0994956	NA	NA	NA	NA	NA	NA	NA	NA	NA
Q3KRF1	0.0625751	-0.0710305	0.00845544	0.0336853	-0.015928	-0.0177573	NA	NA	NA	NA	NA	NA	0.0253369	-0.0254588	0.000121868
Q3MHC2	NA	NA	NA	NA	NA	NA	NA	NA	NA	-0.091774	-0.00151553	0.0932895	NA	NA	NA
Q3MID2	0.217529	0.025753	-0.243283	0.290947	-0.0945799	-0.196367	0.370961	-0.0318029	-0.339158	0.320145	-0.06444	-0.255705	0.233151	0.0246819	-0.257833
Q3MIE4	0.16289	-0.0377464	-0.125144	0.18821	-0.115271	-0.0729398	0.0168365	0.0351193	-0.0519558	0.0214237	0.0159108	-0.0373345	0.0448318	-0.0138749	-0.0309569
Q3SWS8	NA	NA	NA	0.0509319	-0.0639529	0.013021	NA	NA	NA	NA	NA	NA	NA	NA	NA
Q3T1L0	-0.016321	0.0784592	-0.0621382	-0.0306551	0.0751882	-0.0445331	-0.0916756	-0.0134499	0.105126	0.197023	-0.151007	-0.0460159	-0.130867	-0.104739	0.235606
Q3TBD2	0.0445898	-0.0341706	-0.0104191	0.0506072	-0.0496913	-0.000915909	0.0283038	-0.0119777	-0.0163261	0.0762907	-0.0445725	-0.0317182	0.0118138	-0.0396299	0.0278161
Q3TDQ1	NA	NA	NA	-0.0321046	0.0802987	-0.0481941	NA	NA	NA	-0.0468697	-0.0118157	0.0586854	-0.0360886	0.015875	0.0202136
Q3TGF2	-0.0329051	-0.00974195	0.0426471	-0.125342	0.0628109	0.0625311	0.00552098	-0.081015	0.0754941	-0.0365004	0.0417491	-0.00524867	-0.0177381	0.049447	-0.031709
Q3THK7	0.0291397	-0.0997892	0.0706495	-0.0510713	-0.0418748	0.0929461	NA	NA	NA	NA	NA	NA	NA	NA	NA
Q3TIX9	0.101205	-0.00349403	-0.0977107	0.0755415	0.00440197	-0.0799435	NA	NA	NA	-0.0720377	0.0403244	0.0317133	0.0765369	0.202111	-0.278648
Q3TKT4	-0.106737	0.0180613	0.0886753	0.140797	-0.0928431	-0.047954	-0.0222612	-0.0829274	0.105189	-0.107015	0.0015298	0.105485	-0.0435492	0.057887	-0.0143378
Q3TXS7	NA	NA	NA	NA	NA	NA	NA	NA	NA	NA	NA	NA	0.021577	-0.00762233	-0.0139547
Q3TYS2	0.0719573	0.0304176	-0.102375	0.153029	-0.0916185	-0.0614103	0.0633449	0.110303	-0.173648	-0.085039	0.0353782	0.0496608	-0.0476268	-0.014685	0.0623118
Q3TZZ7	0.0813899	0.0306506	-0.112041	0.0382514	0.0931409	-0.131392	0.176525	-0.01244	-0.164085	0.00164371	0.0624557	-0.0640994	0.0715612	0.00132688	-0.0728881
Q3U1J4	0.0574499	0.0350631	-0.092513	-0.0711124	-0.0592853	0.130398	NA	NA	NA	-0.142509	-0.000821348	0.143331	0.00932343	-0.106975	0.0976513
Q3U2S8	0.0282012	-0.0624263	0.0342251	0.0358885	-0.0129584	-0.0229301	0.107521	-0.0314456	-0.0760756	0.0657899	-0.00187318	-0.0639167	0.242137	-0.140626	-0.101511
Q3U487	-0.00724761	0.103587	-0.0963395	-0.109652	0.124282	-0.0146291	NA	NA	NA	0.00766452	-0.0979904	0.0903259	0.110008	-0.0540076	-0.0560006
Q3U9G9	0.157477	-0.012336	-0.145141	-0.101074	0.132928	-0.031854	0.100205	-0.0859559	-0.0142494	0.0970407	-0.0644083	-0.0326325	0.063881	-0.0948389	0.0309579
Q3UA06	-0.014714	0.0648729	-0.0501588	-0.0903696	-0.00101179	0.0913814	NA	NA	NA	0.0365766	-0.0165532	-0.0200234	0.0116802	0.0204416	-0.0321218
Q3UDE2	0.0299186	-0.117703	0.0877842	NA	NA	NA	NA	NA	NA	NA	NA	NA	NA	NA	NA
Q3UEB3	-0.0472881	0.0315464	0.0157418	0.00833003	0.0603743	-0.0687043	NA	NA	NA	NA	NA	NA	NA	NA	NA
Q3UHD2	NA	NA	NA	NA	NA	NA	NA	NA	NA	0.193165	0.00082897	-0.193994	NA	NA	NA
Q3UHD6	NA	NA	NA	0.00368664	-0.0263173	0.0226307	0.0324508	0.0542096	-0.0866604	0.0341629	0.0828155	-0.116978	-0.00501703	-0.000469457	0.00548649
Q3UHD9	NA	NA	NA	NA	NA	NA	NA	NA	NA	0.0524051	-0.00506072	-0.0473444	NA	NA	NA
Q3UHX2	-0.00465256	-0.0391602	0.0438128	0.0776869	-0.0404788	-0.0372081	0.0754378	-0.0390815	-0.0363563	-0.0985534	-0.0419586	0.140512	0.0193168	-0.0567369	0.0374201
Q3UIA2	NA	NA	NA	NA	NA	NA	NA	NA	NA	NA	NA	NA	0.0999286	-0.21227	0.112342
Q3UL36	NA	NA	NA	0.0609388	-0.15596	0.0950213	NA	NA	NA	NA	NA	NA	NA	NA	NA
Q3ULJ0	NA	NA	NA	NA	NA	NA	0.16078	-0.197995	0.0372149	0.0606939	0.0573704	-0.118064	0.0201135	0.00376481	-0.0238783
Q3UMR5	0.105031	-0.020099	-0.084932	-0.178999	0.139774	0.039225	0.128383	-0.0112003	-0.117183	0.123543	-0.0424425	-0.081101	0.0722422	-0.0618716	-0.0103706
Q3UMU9	0.00578517	-0.021066	0.0152808	NA	NA	NA	NA	NA	NA	-0.0332744	0.0070289	0.0262455	NA	NA	NA
Q3UP87	0.103495	-0.171232	0.0677372	-0.0679877	0.326409	-0.258422	-0.0575424	0.336283	-0.278741	0.0515344	0.257512	-0.309046	-0.0011039	0.362596	-0.361492
Q3UQ44	0.0714658	0.0624602	-0.133926	0.077554	-0.076055	-0.00149901	0.127912	0.140974	-0.268886	NA	NA	NA	0.0399917	0.0162292	-0.0562208
Q3UVK0	NA	NA	NA	NA	NA	NA	NA	NA	NA	NA	NA	NA	-0.0324548	0.0375988	-0.00514402
Q3UVL4	0.0666979	0.0104761	-0.077174	NA	NA	NA	NA	NA	NA	NA	NA	NA	NA	NA	NA
Q3UYV9	NA	NA	NA	NA	NA	NA	NA	NA	NA	-0.135243	-0.137645	0.272888	NA	NA	NA
Q3UZA1	0.0134357	0.0092301	-0.0226658	0.172861	-0.0187374	-0.154123	0.0823796	-0.0878032	0.00542357	-0.174747	0.179458	-0.00471101	NA	NA	NA
Q3UZZ4	0.29034	-0.376541	0.0862001	-0.345216	0.462302	-0.117086	0.0713877	-0.00787053	-0.0635171	-0.0664141	-0.0413765	0.107791	0.12924	-0.0431338	-0.0861063
Q3V1L4	0.175974	0.0367967	-0.212771	-0.292552	0.120154	0.172398	0.103182	-0.126853	0.0236708	0.0360657	-0.0683472	0.0322815	0.084026	-0.032396	-0.05163
Q3V3R1	NA	NA	NA	NA	NA	NA	NA	NA	NA	-0.213084	0.174922	0.0381624	NA	NA	NA
Q497B0	0.142011	-0.0912882	-0.0507225	0.119788	-0.0416018	-0.0781861	-0.0583168	0.0806653	-0.0223486	-0.0123061	0.11399	-0.101684	-0.0147814	-0.152981	0.167762
Q497C3	-0.145257	0.0341493	0.111107	NA	NA	NA	NA	NA	NA	NA	NA	NA	0.0793008	-0.0555507	-0.0237501
Q498U4	0.029289	-0.0281203	-0.00116875	0.178642	-0.16028	-0.0183627	0.00139077	0.0440496	-0.0454404	-0.0583544	-0.0137289	0.0720833	0.0564077	-0.0755421	0.0191344
Q4AEF8	0.0683845	-0.0321522	-0.0362323	0.0398373	0.133788	-0.173626	0.0775063	0.00443791	-0.0819443	-0.302753	0.180087	0.122666	0.0379431	-0.0223431	-0.0156
Q4FZT0	-0.0221242	0.00882829	0.0132959	0.0753215	0.0570088	-0.13233	NA	NA	NA	0.00062015	0.100779	-0.101399	NA	NA	NA
Q4FZT2	0.114979	0.0287114	-0.14369	-0.0859271	0.0726445	0.0132826	NA	NA	NA	NA	NA	NA	NA	NA	NA
Q4FZT9	0.0463087	-0.00118926	-0.0451194	-0.00819428	0.000662728	0.00753155	0.012446	0.0534851	-0.0659311	-0.0567927	0.0563784	0.000414265	0.0302825	0.00920249	-0.039485
Q4FZU2	NA	NA	NA	NA	NA	NA	NA	NA	NA	-0.0643394	0.0765981	-0.0122587	-0.208489	-0.0520708	0.26056
Q4FZV0	0.0386762	-0.0430437	0.00436756	0.0140506	-0.0688657	0.0548151	0.154759	-0.0321543	-0.122605	0.052051	0.0157242	-0.0677752	0.0728192	-0.0359776	-0.0368416
Q4FZX7	-0.127357	0.236601	-0.109244	-0.0609139	0.0547723	0.00614159	NA	NA	NA	NA	NA	NA	NA	NA	NA
Q4FZY0	0.0683503	-0.0190397	-0.0493106	0.034077	-0.0429331	0.00885611	0.0592963	-0.0295203	-0.0297761	0.0870902	-0.0112927	-0.0757975	0.0416793	0.00253272	-0.044212
Q4G017	NA	NA	NA	NA	NA	NA	NA	NA	NA	0.0548893	0.0479672	-0.102857	NA	NA	NA
Q4G050	0.0433532	0.0381748	-0.081528	0.0391214	-0.146219	0.107098	-0.0397764	0.0508266	-0.0110502	0.230593	-0.0359604	-0.194633	NA	NA	NA
Q4G061	-0.0159023	0.0416861	-0.0257838	-0.0228202	0.029002	-0.00618176	-0.0374887	0.0124276	0.0250611	-0.0940665	-0.0434594	0.137526	-0.00828161	-0.0182513	0.0265329
Q4G069	0.493047	0.0240309	-0.517078	-0.0547051	0.272262	-0.217557	0.0508975	0.000101389	-0.0509989	NA	NA	NA	-0.0832378	0.0667767	0.0164611
Q4G075	-0.0986263	0.15167	-0.053044	-0.231199	0.177924	0.0532747	0.127334	-0.0986268	-0.0287069	-0.1302	-0.108345	0.238545	-0.00304759	0.120908	-0.11786
Q4KLF8	-0.0160887	-0.0152668	0.0313556	-0.0123834	0.0403448	-0.0279614	-0.0463437	0.0026746	0.0436691	0.0380532	0.0258862	-0.0639394	-0.0146376	0.0125373	0.00210024
Q4KLH4	0.0869101	-0.0713294	-0.0155807	NA	NA	NA	NA	NA	NA	-0.297094	0.140447	0.156647	NA	NA	NA
Q4KLH5	NA	NA	NA	NA	NA	NA	NA	NA	NA	-0.0269919	0.126605	-0.0996135	NA	NA	NA
Q4KLL0	0.0127097	-0.00431559	-0.00839412	NA	NA	NA	-0.00926983	0.069595	-0.0603252	NA	NA	NA	NA	NA	NA
Q4KLZ6	0.003945	-0.0373766	0.0334316	-0.00629408	0.0347585	-0.0284644	0.0431736	0.040028	-0.0832016	0.0119301	-0.00691764	-0.00501251	0.013658	0.0353748	-0.0490329
Q4KM31	NA	NA	NA	NA	NA	NA	-0.0964554	0.0997303	-0.00327484	NA	NA	NA	NA	NA	NA
Q4KM33	0.0258727	0.158624	-0.184496	0.0255832	-0.0313811	0.00579786	0.178877	-0.0489495	-0.129927	0.111812	-0.0230246	-0.0887873	0.0687597	0.10544	-0.1742
Q4KM35	-0.00917321	0.0344761	-0.0253029	0.139213	-0.106578	-0.0326346	-0.0293732	0.105476	-0.076103	-0.0845337	0.109573	-0.0250396	0.0380483	-0.0527539	0.0147056
Q4KM49	0.00839539	0.0394757	-0.0478711	-0.0315792	0.00407218	0.027507	NA	NA	NA	-0.00239512	-0.0320996	0.0344947	0.118764	-0.0169779	-0.101786
Q4KM73	0.0763273	-0.0556144	-0.0207128	0.108886	-0.135472	0.0265863	0.023414	0.0268766	-0.0502906	0.0552475	0.0189832	-0.0742307	0.0465346	-0.0493826	0.00284803
Q4KM98	NA	NA	NA	-0.0411081	0.162112	-0.121004	NA	NA	NA	NA	NA	NA	NA	NA	NA
Q4KMA2	-0.00894307	-0.0171945	0.0261376	-0.0414846	0.0281191	0.0133655	-0.0512446	0.0359293	0.0153153	-0.113545	0.0892071	0.0243377	0.0358605	-0.0310205	-0.00484002
Q4KML4	-0.0569544	-0.0847786	0.141733	-0.13911	0.0992857	0.0398244	-0.255265	0.346917	-0.0916526	0.0521844	-0.00961458	-0.0425698	-0.0297849	0.159028	-0.129243
Q4LDD4	0.152654	-0.0147594	-0.137895	-0.0154234	-0.0135657	0.028989	0.0580624	0.0899985	-0.148061	0.105179	-0.0906562	-0.0145233	0.0764153	0.10242	-0.178835
Q4QQT4	NA	NA	NA	0.0882464	-0.141738	0.0534912	NA	NA	NA	NA	NA	NA	NA	NA	NA
Q4QQW8	0.0399137	-0.0258261	-0.0140876	0.0301011	0.0403842	-0.0704853	NA	NA	NA	-0.0848123	0.0368353	0.047977	0.0491155	-0.0372656	-0.0118499
Q4QRL3	0.0485094	0.00138202	-0.0498914	0.0761754	-0.0534533	-0.0227221	0.132903	-0.101718	-0.0311851	0.11863	-0.0602554	-0.0583744	0.0946136	0.0414642	-0.136078
Q4V8B0	0.0779899	-0.154893	0.0769034	0.119574	-0.0571297	-0.0624444	NA	NA	NA	NA	NA	NA	NA	NA	NA
Q4V8F9	0.00855343	0.0302646	-0.0388181	-0.153087	0.101277	0.0518105	-0.0956167	-0.0306768	0.126293	0.0368904	-0.226048	0.189158	-0.0780252	0.0173117	0.0607134
Q4V8K1	0.632462	-0.286614	-0.345848	0.169682	0.122963	-0.292645	0.467403	-0.181436	-0.285967	0.691442	-0.508617	-0.182825	0.152732	-0.204067	0.0513352
Q4V8K5	NA	NA	NA	NA	NA	NA	NA	NA	NA	-0.0481829	-0.0233957	0.0715785	-0.0993596	0.0325106	0.066849
Q4VA53	0.0202726	-0.0329456	0.012673	0.0203218	-0.00671526	-0.0136066	-0.109653	0.0903846	0.0192683	-0.0517906	0.0435172	0.00827337	0.0295853	-0.164839	0.135253
Q4VSI4	0.0180149	-0.00945736	-0.00855755	-0.0393466	0.0315054	0.00784127	-0.00565011	-0.0332927	0.0389429	-0.0352064	0.000846988	0.0343595	0.0343058	-0.102954	0.0686482
Q501J6	-0.0447569	-0.0129351	0.057692	0.0833695	-0.168665	0.0852953	-0.0711755	0.0180258	0.0531497	-0.11958	0.0647351	0.0548448	-0.0375804	0.014034	0.0235464
Q505J8	-0.00243666	0.0265292	-0.0240925	-0.155496	0.1352	0.0202963	-0.0878339	0.0818664	0.00596746	-0.0272769	-0.0971579	0.124435	0.00798502	0.161071	-0.169056
Q52KI8	-0.0734328	0.00467752	0.0687553	NA	NA	NA	NA	NA	NA	NA	NA	NA	NA	NA	NA
Q53UA7	-0.0257512	-0.0111411	0.0368923	0.0746284	-0.0421421	-0.0324863	0.0993968	-0.139389	0.0399926	0.0185302	-0.00389782	-0.0146323	NA	NA	NA
Q561S0	NA	NA	NA	0.0531917	-0.0421593	-0.0110324	NA	NA	NA	-0.322455	0.275459	0.0469962	NA	NA	NA
Q566C7	NA	NA	NA	NA	NA	NA	NA	NA	NA	0.0826096	0.0111451	-0.0937547	NA	NA	NA
Q569Z5	-0.0518144	0.0470062	0.00480816	-0.240896	0.0237282	0.217167	NA	NA	NA	NA	NA	NA	NA	NA	NA
Q56A18	NA	NA	NA	NA	NA	NA	NA	NA	NA	-0.0892983	0.0700682	0.0192301	NA	NA	NA
Q5BJK8	NA	NA	NA	NA	NA	NA	0.128485	-0.311588	0.183104	NA	NA	NA	NA	NA	NA
Q5BJQ2	NA	NA	NA	NA	NA	NA	NA	NA	NA	0.126624	0.0554546	-0.182079	NA	NA	NA
Q5BK32	-0.01899	0.00030375	0.0186863	NA	NA	NA	NA	NA	NA	NA	NA	NA	NA	NA	NA
Q5BK63	0.0969936	0.0439967	-0.14099	0.0515079	0.00811372	-0.0596216	-0.0288954	0.157988	-0.129092	NA	NA	NA	-0.112636	0.0508531	0.0617828
Q5BLK4	0.09496	0.0442703	-0.13923	-0.0692555	0.214556	-0.145301	0.0526873	-0.00102769	-0.0516596	NA	NA	NA	-0.0419891	0.0365112	0.00547791
Q5FVC2	-0.157933	-0.0101598	0.168093	0.0104725	-0.0182042	0.00773173	0.0164722	-0.0596555	0.0431833	-0.0386096	0.0128932	0.0257165	-0.0242337	0.0870788	-0.062845
Q5FVC7	0.0300174	-0.0315183	0.00150089	-0.00565849	-0.0212683	0.0269268	0.115832	-0.116159	0.000327114	0.0400989	-0.0861505	0.0460516	0.0382556	-0.0790745	0.0408189
Q5FVF4	NA	NA	NA	-0.0111186	0.231755	-0.220636	NA	NA	NA	0.225331	0.0371848	-0.262516	-0.113152	0.103744	0.00940713
Q5FVI6	0.105007	-0.0121199	-0.0928868	0.0878174	-0.073333	-0.0144845	0.00859788	-0.0451609	0.0365631	0.0616676	0.0328889	-0.0945565	0.00887257	-0.0193113	0.0104387
Q5FVM4	0.0402762	-0.038977	-0.00129922	NA	NA	NA	-0.0257626	0.0117303	0.0140323	-0.0873746	0.0316947	0.0556799	-0.0175329	-0.0152216	0.0327545
Q5FVN0	0.0141611	-0.018711	0.00454995	-0.00237662	0.0333892	-0.0310125	NA	NA	NA	-0.0273045	0.0732737	-0.0459692	0.079283	-0.0600228	-0.0192602
Q5FVQ4	-0.0597761	0.0870025	-0.0272264	0.0435039	-0.0758035	0.0322997	-0.00754851	0.0160647	-0.00851624	-0.109857	0.0682186	0.0416381	-0.0801907	0.0684264	0.0117643
Q5FVQ8	0.09117	0.186184	-0.277354	NA	NA	NA	0.0829874	0.0777471	-0.160734	-0.131339	0.1205	0.0108392	0.0233982	0.0406073	-0.0640055
Q5FWK3	0.0277567	-0.0446301	0.0168734	-0.0122889	-0.0369385	0.0492274	0.053241	0.0328269	-0.086068	0.059596	-0.0490547	-0.0105413	-0.0157997	0.0360899	-0.0202902
Q5FWT7	NA	NA	NA	NA	NA	NA	NA	NA	NA	-0.0206538	-0.0478939	0.0685477	NA	NA	NA
Q5FWY5	-0.0503202	-0.00173398	0.0520542	0.0148536	0.0179052	-0.0327588	-0.0905303	0.0774102	0.0131202	0.0344788	-0.128424	0.0939456	0.00883867	-0.120057	0.111218
Q5HZE4	0.137147	-0.270678	0.133531	0.0786382	-0.00435118	-0.0742871	0.0065867	0.121731	-0.128317	-0.126248	0.0863869	0.0398611	0.0488031	-0.0453748	-0.00342833
Q5HZV9	NA	NA	NA	NA	NA	NA	NA	NA	NA	NA	NA	NA	0.0495272	-0.0854302	0.0359031
Q5HZY2	NA	NA	NA	NA	NA	NA	-0.0134146	0.117826	-0.104411	NA	NA	NA	-0.0336761	0.0106443	0.0230318
Q5I0D1	-0.0642011	-0.169254	0.233455	0.131608	-0.30675	0.175141	-0.253934	0.149378	0.104556	-0.20176	-0.0906317	0.292392	0.0221879	-0.00718509	-0.0150028
Q5I0D5	NA	NA	NA	NA	NA	NA	NA	NA	NA	0.0916564	-0.244823	0.153166	NA	NA	NA
Q5I0D7	NA	NA	NA	0.0960551	-0.192434	0.0963784	NA	NA	NA	-0.429202	0.336024	0.0931778	NA	NA	NA
Q5I0E7	-0.0360315	0.0346182	0.0014133	0.00804313	-0.0333199	0.0252768	-0.106771	0.095379	0.0113921	-0.0307674	0.0409403	-0.0101729	-0.0413763	0.0202219	0.0211544
Q5I0G4	-0.0841914	0.0498856	0.0343057	-0.0161385	0.0530284	-0.0368899	-0.035726	0.104294	-0.0685678	-0.0613072	0.0951772	-0.03387	-0.0163234	0.0814092	-0.0650857
Q5KTC7	NA	NA	NA	-0.211981	0.124027	0.0879536	-0.213037	-0.0558514	0.268889	-0.0115259	-0.207814	0.21934	-0.0469932	-0.0030369	0.05003
Q5M7V8	0.0224301	-0.0754482	0.0530181	0.104414	-0.105352	0.000937895	-0.0137669	0.0312442	-0.0174773	-0.00502064	0.0340409	-0.0290203	-0.014566	-0.0434341	0.058
Q5M7W5	0.032549	-0.0508448	0.0182958	0.065537	-0.0725532	0.00701622	0.0257685	0.0413481	-0.0671165	-0.0708508	0.112455	-0.0416042	0.0171915	0.0283351	-0.0455266
Q5M819	NA	NA	NA	NA	NA	NA	NA	NA	NA	0.0344862	0.0394203	-0.0739066	0.113121	-0.0346045	-0.0785161
Q5M9G3	-0.269639	0.0354538	0.234185	NA	NA	NA	NA	NA	NA	-0.320089	0.107482	0.212606	NA	NA	NA
Q5MYT7	NA	NA	NA	NA	NA	NA	0.541613	-0.0965326	-0.44508	NA	NA	NA	NA	NA	NA
Q5PQN1	NA	NA	NA	NA	NA	NA	NA	NA	NA	0.0475122	-0.0673268	0.0198146	NA	NA	NA
Q5PQN7	0.307039	-0.294136	-0.0129039	NA	NA	NA	0.0183502	0.101515	-0.119865	0.0620166	0.00307868	-0.0650953	NA	NA	NA
Q5PQX1	0.0514374	-0.061745	0.0103076	0.0467905	-0.0444851	-0.0023054	0.0887708	-0.0871138	-0.00165705	-0.0105975	0.0187231	-0.00812556	-0.0816152	0.0494367	0.0321785
Q5RJQ4	NA	NA	NA	NA	NA	NA	0.0992099	-0.125325	0.0261151	NA	NA	NA	NA	NA	NA
Q5RJR8	-0.121053	0.0259464	0.0951068	0.00939729	-0.0979228	0.0885255	-0.19704	0.00245992	0.19458	-0.230829	0.0573768	0.173452	-0.0860152	0.00127288	0.0847424
Q5RK09	-0.0500426	0.0244997	0.0255429	-0.0842476	0.00598607	0.0782615	-0.121632	0.0700073	0.0516244	-0.112813	-0.000620002	0.113433	0.0429552	-0.0426767	-0.000278466
Q5RK28	-0.0533094	0.0763978	-0.0230884	-0.101292	0.0384975	0.0627944	0.0572085	-0.160633	0.103424	-0.0535626	-0.0303045	0.0838672	-0.0884619	0.00845715	0.0800047
Q5RKI0	0.0234603	-0.00479439	-0.0186659	0.00866099	-0.00713686	-0.00152413	0.00451989	-0.0372874	0.0327675	0.0605112	-0.0107718	-0.0497395	0.0220755	-0.0109562	-0.0111192
Q5S006	NA	NA	NA	NA	NA	NA	NA	NA	NA	NA	NA	NA	0.126628	0.0900112	-0.216639
Q5SGE0	NA	NA	NA	0.0209533	-0.154807	0.133854	NA	NA	NA	-0.303784	0.137353	0.166431	0.0196394	-0.0944054	0.074766
Q5SQX6	0.174517	-0.0141163	-0.160401	0.034503	0.0025916	-0.0370946	0.0379134	0.0186127	-0.0565261	0.0826367	-0.0411509	-0.0414858	0.0511311	0.0293723	-0.0805033
Q5SSL4	NA	NA	NA	NA	NA	NA	NA	NA	NA	NA	NA	NA	-0.20152	0.237537	-0.0360174
Q5SSW2	0.0273124	0.0111598	-0.0384722	-0.232631	0.100677	0.131953	0.123113	0.0145267	-0.13764	0.0745933	-0.0882329	0.0136397	0.0284726	0.0341367	-0.0626093
Q5SUA5	0.0266057	0.0238044	-0.0504101	0.0814767	0.0139645	-0.0954411	0.00410789	0.0255294	-0.0296373	-0.00730187	0.047659	-0.0403572	-0.0221332	0.0217243	0.000408856
Q5SUR0	NA	NA	NA	NA	NA	NA	NA	NA	NA	-0.0942376	0.072896	0.0213416	NA	NA	NA
Q5SVL6	NA	NA	NA	NA	NA	NA	NA	NA	NA	NA	NA	NA	-0.0679899	-0.0422191	0.110209
Q5SVR0	NA	NA	NA	NA	NA	NA	NA	NA	NA	-0.0863496	0.0948772	-0.0085276	NA	NA	NA
Q5U216	-0.000204278	0.0485896	-0.0483853	0.000620641	-0.212769	0.212148	-0.193892	0.168724	0.0251678	-0.21367	-0.0554123	0.269083	-0.0553076	-0.0408519	0.0961595
Q5U2V4	0.000983299	-0.0466734	0.0456901	-0.123396	0.144176	-0.02078	-0.00844265	-0.0197316	0.0281742	0.0897907	-0.072988	-0.0168027	-0.0457385	0.0268653	0.0188732
Q5U2Y6	NA	NA	NA	-0.0181466	-0.0290151	0.0471617	NA	NA	NA	NA	NA	NA	NA	NA	NA
Q5U2Z3	NA	NA	NA	0.0706262	-0.141661	0.0710346	NA	NA	NA	-0.14406	0.0449183	0.0991413	-0.102707	0.0953006	0.00740588
Q5U300	0.0556391	-0.0289258	-0.0267133	0.00265799	0.00206035	-0.00471834	-0.0162287	0.0224556	-0.00622682	-0.01435	0.0296559	-0.0153059	0.0311244	-0.0296905	-0.00143396
Q5U405	NA	NA	NA	0.0919569	-0.0478147	-0.0441422	NA	NA	NA	NA	NA	NA	NA	NA	NA
Q5XFX0	0.121953	-0.0333979	-0.0885551	0.0578126	-0.103897	0.0460847	-0.0220296	-0.0192881	0.0413176	0.0182547	0.0269502	-0.0452049	-0.0418041	-0.00581897	0.0476231
Q5XHY5	0.0854785	0.00280109	-0.0882796	NA	NA	NA	NA	NA	NA	0.0928753	-0.0402522	-0.0526232	-0.000108789	-0.0252427	0.0253515
Q5XI28	0.0719584	0.00647559	-0.078434	0.0822965	0.102043	-0.18434	NA	NA	NA	-0.0581928	0.0209893	0.0372035	NA	NA	NA
Q5XI32	0.0340402	-0.00447739	-0.0295628	0.0293529	-0.0326187	0.00326583	0.0199184	-0.0286123	0.00869391	0.0489713	-0.0349196	-0.0140517	0.000326829	0.0243489	-0.0246757
Q5XI41	0.00945828	-0.0306937	0.0212354	0.0132963	0.015099	-0.0283953	0.0687411	-0.000761594	-0.0679795	-0.187491	0.233803	-0.0463117	-0.00458662	0.0361443	-0.0315577
Q5XI42	0.119135	-0.0144063	-0.104729	0.0278396	0.0688867	-0.0967263	0.0787226	-0.0389014	-0.0398212	0.0856189	0.0769821	-0.162601	-0.00169973	-0.00739675	0.00909648
Q5XI72	-0.139028	-0.00487984	0.143908	-0.103226	-0.0386431	0.141869	0.020267	-0.0602317	0.0399647	-0.086291	-0.0344495	0.120741	0.0226161	-0.018668	-0.00394812
Q5XI78	-0.00591964	0.0515109	-0.0455912	0.0993554	-0.0276874	-0.0716679	0.0157861	0.0760171	-0.0918032	-0.211598	0.100513	0.111084	-0.000937323	0.0288633	-0.0279259
Q5XI81	NA	NA	NA	NA	NA	NA	NA	NA	NA	NA	NA	NA	-0.0897844	-0.0404076	0.130192
Q5XI83	NA	NA	NA	-0.176163	0.0487978	0.127365	0.0434619	0.147502	-0.190964	NA	NA	NA	NA	NA	NA
Q5XIC1	NA	NA	NA	0.00349166	-0.0421414	0.0386497	NA	NA	NA	0.00331954	0.0219524	-0.025272	0.0705355	0.0393178	-0.109853
Q5XIE0	0.0543687	-0.138379	0.0840107	-0.154708	0.0336195	0.121089	0.000853568	-0.0206695	0.019816	-0.189933	0.0950234	0.0949096	-0.00656073	-0.0208729	0.0274336
Q5XIG6	NA	NA	NA	0.107503	-0.0598718	-0.0476316	0.0996817	0.0179677	-0.117649	0.0233988	0.0440049	-0.0674038	0.0596788	0.133523	-0.193202
Q5XIG8	-0.0924096	-0.0804974	0.172907	NA	NA	NA	-0.0928019	-0.0194342	0.112236	-0.138124	0.127803	0.0103209	-0.115453	-0.0462329	0.161686
Q5XIM5	0.0102193	-0.0781638	0.0679445	NA	NA	NA	-0.0082573	-0.120848	0.129106	-0.0210219	0.00309858	0.0179233	-0.0716378	-0.0404934	0.112131
Q5XIM9	0.00146453	0.00125458	-0.00271911	0.0264833	-0.0466152	0.0201319	0.01218	0.0676933	-0.0798733	-0.0547729	-0.0203272	0.0751001	0.0521991	-0.0837264	0.0315273
Q5XIN6	-0.0602346	-0.0211141	0.0813487	0.0815266	-0.0236654	-0.0578612	NA	NA	NA	-0.0930631	0.0555116	0.0375516	-0.0320883	0.0428444	-0.010756
Q5XIP6	-0.0360847	0.0745089	-0.0384242	0.0364694	0.0218058	-0.0582753	0.0814199	0.0239364	-0.105356	-0.0161877	-0.0222787	0.0384665	0.0226255	-0.0336584	0.0110329
Q5XIP9	0.149444	0.0177947	-0.167238	0.0569369	-0.0583185	0.0013816	-0.023761	-0.0521782	0.0759392	0.0814684	-0.0084119	-0.0730565	0.0306571	-0.0108498	-0.0198073
Q5XIS9	-0.295783	0.0690112	0.226772	NA	NA	NA	NA	NA	NA	NA	NA	NA	NA	NA	NA
Q5XIU9	NA	NA	NA	0.165383	0.0275267	-0.19291	NA	NA	NA	NA	NA	NA	NA	NA	NA
Q5XJY5	-0.0651763	0.0411183	0.024058	-0.0822793	0.0392557	0.0430236	-0.0834339	-0.0365179	0.119952	-0.0335	0.0351542	-0.00165415	-0.0601873	0.00265994	0.0575273
Q5XXR3	-0.000803588	0.00130068	-0.000497089	-0.0446162	-0.0199826	0.0645988	0.0382221	-0.098649	0.0604269	0.0426207	-0.0174808	-0.02514	NA	NA	NA
Q60432	NA	NA	NA	-0.0146689	-0.069308	0.0839769	NA	NA	NA	NA	NA	NA	0.0138949	-0.0597849	0.04589
Q60520	NA	NA	NA	0.042805	-0.0160891	-0.0267159	NA	NA	NA	NA	NA	NA	NA	NA	NA
Q60587	NA	NA	NA	0.0817759	0.00863116	-0.090407	NA	NA	NA	-0.166303	0.0540977	0.112206	0.0174719	-0.0173841	-8.78e-05
Q60605	0.0605115	0.027171	-0.0876825	0.0773609	0.0153446	-0.0927055	0.0253063	0.0350503	-0.0603566	0.0684251	0.0335775	-0.102003	0.00221196	-0.00551955	0.00330759
Q60634	-0.028464	0.0546472	-0.0261832	-0.126943	0.179665	-0.0527221	0.0461253	-0.0484766	0.00235132	0.042289	-0.0436795	0.00139049	-0.0484495	0.011367	0.0370826
Q60648	0.17256	-0.107209	-0.0653506	0.300615	-0.40186	0.101246	-0.0531437	0.205964	-0.15282	-0.193741	0.218946	-0.0252054	-0.0715821	-0.00864618	0.0802283
Q60668	NA	NA	NA	NA	NA	NA	-0.0931086	0.129781	-0.0366724	-0.145051	0.00351257	0.141538	NA	NA	NA
Q60710	0.0884194	0.345341	-0.43376	0.397999	-0.322982	-0.075017	NA	NA	NA	-0.38141	0.0582967	0.323113	-0.0540376	0.166846	-0.112808
Q60749	-0.0358722	-0.000926414	0.0367987	NA	NA	NA	-0.0596178	0.0703705	-0.0107528	-0.0674543	0.0162497	0.0512045	NA	NA	NA
Q60787	-0.0869508	0.153432	-0.0664816	-0.162381	0.0836019	0.0787795	NA	NA	NA	-0.111707	0.0604342	0.0512727	0.0186058	0.0303277	-0.0489335
Q60790	NA	NA	NA	-0.0329904	0.144853	-0.111862	NA	NA	NA	NA	NA	NA	NA	NA	NA
Q60817	-0.0993704	-0.018828	0.118198	-0.086288	-0.119911	0.206199	-0.192473	0.0776433	0.114829	-0.263799	0.0752814	0.188518	-0.0934428	-0.0253564	0.118799
Q60872	0.0729347	-0.0143604	-0.0585743	-0.00667792	-0.0714345	0.0781124	-0.0347241	0.0173845	0.0173395	-0.134207	0.0595671	0.0746399	NA	NA	NA
Q60902	0.0531749	-0.0332845	-0.0198904	-0.0294505	0.139862	-0.110411	-0.0333112	0.0437279	-0.0104167	0.0818036	0.00439343	-0.086197	0.062364	0.0243862	-0.0867501
Q60973	0.110001	-0.135713	0.0257124	NA	NA	NA	NA	NA	NA	NA	NA	NA	NA	NA	NA
Q61033	NA	NA	NA	NA	NA	NA	-0.0516678	0.386508	-0.334841	NA	NA	NA	NA	NA	NA
Q61035	-0.0391904	0.00942315	0.0297673	0.0626231	-0.0278939	-0.0347293	-0.00425977	-0.00184374	0.00610351	-0.0598328	0.101132	-0.0412996	0.0520969	-0.0248143	-0.0272827
Q61074	NA	NA	NA	NA	NA	NA	NA	NA	NA	NA	NA	NA	-0.00381792	-0.0242081	0.028026
Q61081	-0.0675952	0.0259521	0.0416431	0.0252055	-0.0348816	0.00967611	0.0341154	-0.0530025	0.0188871	NA	NA	NA	0.0443165	0.00571953	-0.050036
Q61093	0.0803556	-0.0363699	-0.0439857	0.049861	0.0160425	-0.0659035	-0.0041476	0.0608613	-0.0567137	0.0870013	-0.00243927	-0.084562	0.0160247	-0.000422752	-0.015602
Q61096	0.0502684	-0.136472	0.0862039	-0.149115	0.645002	-0.495886	-0.212986	0.588597	-0.37561	0.0943826	0.350167	-0.44455	-0.087823	0.642383	-0.55456
Q61161	-0.0681886	-0.00661302	0.0748016	-0.0141879	0.0117228	0.00246508	0.0460487	-0.049399	0.00335025	-0.00384484	-0.00813419	0.011979	-0.0284269	0.014039	0.0143879
Q61164	0.0353514	-0.0814042	0.0460528	0.135499	-0.103843	-0.0316563	0.00502231	0.00174989	-0.0067722	NA	NA	NA	NA	NA	NA
Q61187	-0.0393533	1.4e-05	0.0393393	-0.225105	0.116847	0.108258	-0.0139116	-0.0474904	0.0614019	0.0629491	-0.0338576	-0.0290916	-0.0485668	-0.0518454	0.100412
Q61191	0.0424258	-0.137344	0.0949179	0.105076	-0.0147539	-0.0903217	0.041595	-0.0509025	0.00930751	0.0265591	-0.0912472	0.064688	-0.0327004	-0.104256	0.136956
Q61206	0.0180447	-0.0195962	0.00155142	0.0198552	0.00387199	-0.0237272	0.0032701	0.0754898	-0.0787599	0.016891	-0.00444974	-0.0124412	0.0441497	-0.0333809	-0.0107688
Q61233	0.0395316	0.00137733	-0.0409089	-0.018016	0.11436	-0.0963445	0.0653583	0.0228885	-0.0882468	0.073053	0.0629616	-0.136015	-0.00537663	0.0771859	-0.0718092
Q61239	NA	NA	NA	NA	NA	NA	NA	NA	NA	0.0615283	0.017043	-0.0785713	NA	NA	NA
Q61334	NA	NA	NA	-0.0178552	0.0302651	-0.0124099	NA	NA	NA	NA	NA	NA	NA	NA	NA
Q61335	-0.0990864	0.0785884	0.020498	0.0351762	0.0200523	-0.0552285	0.0249349	-0.0930526	0.0681177	-0.0536009	0.0294717	0.0241292	0.0013159	-0.128259	0.126943
Q61414	NA	NA	NA	NA	NA	NA	-0.364141	0.682725	-0.318584	NA	NA	NA	NA	NA	NA
Q61510	-0.0170254	-0.0934404	0.110466	NA	NA	NA	-0.107847	0.104861	0.00298573	-0.106826	0.0248767	0.0819493	NA	NA	NA
Q61545	0.16842	0.091534	-0.259954	0.03872	-0.0753934	0.0366734	0.0290699	0.0948944	-0.123964	0.00545293	-0.0170406	0.0115877	0.0314818	0.0214009	-0.0528827
Q61550	NA	NA	NA	0.106004	0.0462655	-0.15227	0.0572078	0.02006	-0.0772679	0.0685745	-0.00374922	-0.0648253	0.0702363	-0.153124	0.0828876
Q61598	0.079423	-0.0350211	-0.044402	-0.0133292	0.0126151	0.000714077	0.0111741	0.0904896	-0.101664	-0.0350295	0.0933317	-0.0583022	-0.00753648	0.0335317	-0.0259953
Q61599	-0.0231896	-0.0949562	0.118146	-0.0851494	-0.0256341	0.110783	0.0242444	-0.0645225	0.040278	0.0749335	-0.0212066	-0.0537269	-0.0279253	-0.0376737	0.065599
Q61655	-0.0324049	-0.0255098	0.0579147	-0.180102	0.121678	0.058424	NA	NA	NA	0.0101679	0.0279306	-0.0380985	0.0200623	0.0192155	-0.0392778
Q61656	-0.084399	0.0373601	0.0470389	0.037716	-0.106417	0.0687012	-0.136616	0.0326883	0.103928	-0.246476	0.09183	0.154646	-0.0705754	-0.00277264	0.073348
Q61686	NA	NA	NA	NA	NA	NA	NA	NA	NA	-0.013179	0.00969592	0.00348307	NA	NA	NA
Q61823	0.0959637	0.027144	-0.123108	NA	NA	NA	-0.163463	0.315031	-0.151567	-0.0483131	0.0652968	-0.0169838	0.06005	-0.0621841	0.00213413
Q61881	-0.186344	-0.110245	0.296589	-0.149166	-0.12898	0.278146	-0.0986015	-0.0818806	0.180482	-0.148856	0.00963338	0.139223	-0.102237	-0.0498123	0.15205
Q61941	0.0596664	0.00186267	-0.0615291	0.160099	-0.0323076	-0.127791	0.0493175	0.103507	-0.152825	-0.17003	0.116299	0.0537311	0.0274863	-0.0218139	-0.00567244
Q61990	-0.0867176	-0.00243462	0.0891522	-0.00535891	0.0245809	-0.019222	-0.0227794	-0.0443426	0.067122	-0.128932	0.12316	0.00577161	-0.026212	-0.0661541	0.0923661
Q62093	-0.00981136	0.0131844	-0.00337299	0.0900238	-0.0577007	-0.0323231	-0.119082	0.101991	0.0170902	-0.112321	0.0478335	0.0644876	0.00279584	0.0554669	-0.0582627
Q62095	0.134309	-0.0337501	-0.100559	NA	NA	NA	NA	NA	NA	NA	NA	NA	NA	NA	NA
Q62167	NA	NA	NA	NA	NA	NA	NA	NA	NA	-0.151163	0.0532174	0.0979453	NA	NA	NA
Q62178	NA	NA	NA	NA	NA	NA	NA	NA	NA	0.0127376	-0.0528304	0.0400929	NA	NA	NA
Q62186	-0.100493	0.0271748	0.073318	-0.0313871	-0.00327861	0.0346658	-0.193849	0.0065941	0.187255	-0.0916755	-0.168005	0.25968	-0.155015	0.0728056	0.0822093
Q62189	NA	NA	NA	0.163269	-0.089755	-0.0735138	NA	NA	NA	NA	NA	NA	NA	NA	NA
Q62241	NA	NA	NA	0.0403987	-0.108386	0.0679868	NA	NA	NA	-0.120194	0.0111694	0.109025	NA	NA	NA
Q62261	0.00732439	-0.0542661	0.0469417	0.0139584	0.00168038	-0.0156388	0.0341947	-0.0170479	-0.0171469	0.0151081	-0.0173358	0.00222772	-0.0140155	-0.0335768	0.0475922
Q62318	-0.02117	-0.0192674	0.0404375	0.116333	-0.0885717	-0.0277616	-0.0695555	0.11303	-0.0434745	-0.19359	0.125088	0.0685023	0.00541712	-0.046731	0.0413138
Q62376	0.109261	-0.176628	0.0673666	0.0650995	-0.0405573	-0.0245422	-0.0396482	0.0239936	0.0156546	-0.0380847	0.020445	0.0176397	-0.0433893	0.0547629	-0.0113736
Q62393	0.0747765	0.0316201	-0.106397	0.0590727	-0.0671712	0.00809852	0.0657071	0.0448849	-0.110592	-0.00187824	0.143297	-0.141419	-0.0294918	-0.000788447	0.0302802
Q62425	NA	NA	NA	NA	NA	NA	NA	NA	NA	-0.221034	0.00153348	0.219501	NA	NA	NA
Q62431	NA	NA	NA	NA	NA	NA	NA	NA	NA	-0.0745119	0.0971898	-0.0226779	NA	NA	NA
Q62446	-0.150528	0.0317753	0.118753	-0.0473345	-0.0166468	0.0639813	-0.226126	-0.0385443	0.26467	-0.0821539	0.0103875	0.0717664	-0.0674192	-0.0609425	0.128362
Q62448	0.0376024	0.0308697	-0.0684721	-0.0395548	-0.0566825	0.0962372	-0.0440175	0.00776521	0.0362522	-0.121435	-0.00295917	0.124394	0.0305201	-0.0487019	0.0181818
Q62523	0.040056	0.0268119	-0.0668679	-0.0540281	0.0614174	-0.00738933	0.025773	-0.120556	0.0947828	0.0765486	-0.0642925	-0.0122561	0.0344108	-0.0454661	0.0110553
Q62636	-0.0547307	0.0982401	-0.0435093	-0.0150095	0.134282	-0.119273	-0.063967	0.0928713	-0.0289043	-0.148859	0.331801	-0.182942	-0.0675674	0.108774	-0.0412071
Q62639	NA	NA	NA	NA	NA	NA	NA	NA	NA	0.0788624	0.053827	-0.132689	NA	NA	NA
Q62667	0.0153265	0.0119844	-0.0273109	0.0953919	-0.0790879	-0.016304	-0.0269927	0.0539509	-0.0269582	-0.116845	0.076492	0.0403527	0.0178304	-0.0248469	0.00701643
Q62713	-0.256447	0.0525625	0.203884	-0.403022	0.442514	-0.0394921	-0.010803	-0.377409	0.388212	0.303254	-0.202567	-0.100687	-0.212072	0.153413	0.058659
Q62714	-0.0468256	-0.130312	0.177137	-0.199957	0.474294	-0.274337	-0.21611	0.130224	0.0858858	0.285674	0.0208789	-0.306553	-0.181103	0.384063	-0.20296
Q62715	-0.0539466	-0.0192284	0.073175	-0.164646	0.569749	-0.405103	-0.00334286	-0.0538485	0.0571913	0.303835	0.0446986	-0.348534	-0.0372702	0.310529	-0.273259
Q62733	NA	NA	NA	0.266266	-0.226691	-0.0395754	NA	NA	NA	-0.343795	0.212586	0.131209	0.0173518	-0.0142696	-0.00308217
Q62737	0.0556324	-0.0623064	0.00667408	-0.00115658	-0.0247916	0.0259482	-0.000167816	0.0236301	-0.0293278	0.0312901	0.03972	-0.0710101	-0.0182483	0.105839	-0.0875911
Q62753	0.0928588	-0.0171004	-0.0757585	0.00901614	0.00527944	-0.0142956	0.0397701	-0.0184249	-0.0213453	0.147572	-0.0781009	-0.0694711	0.0533571	-0.0530709	-0.000286213
Q62780	NA	NA	NA	NA	NA	NA	NA	NA	NA	-0.0620412	-0.0456615	0.107703	NA	NA	NA
Q62812	0.0396338	0.0219748	-0.0616086	0.0618666	0.0157152	-0.0775818	0.0652473	-0.0249601	-0.0402873	0.0552443	0.00299195	-0.0582363	-0.0305782	0.0155266	0.0150516
Q62826	0.0492236	0.07877	-0.127994	0.15628	-0.130206	-0.0260743	0.0722576	0.0311527	-0.10341	-0.0494739	0.0451638	0.00431011	0.0008813	0.00424831	-0.00512961
Q62847	-0.0440281	-0.0232259	0.067254	0.0945267	-0.0862165	-0.00831023	0.0117536	-0.00456328	-0.00719033	-0.0272627	0.00964513	0.0176176	-0.0397369	-0.0834006	0.123138
Q62867	-0.0496066	-0.0214691	0.0710757	-0.0685634	0.0509327	0.0176307	-0.0603205	0.0599697	0.000350779	0.0261747	0.0316231	-0.0577978	-0.213149	0.111234	0.101916
Q62902	0.00177712	-0.0215956	0.0198185	0.0669324	-0.0673207	0.000388301	0.0853548	-0.162331	0.0769763	-0.048427	0.028212	0.0202151	NA	NA	NA
Q62920	0.0879039	-0.0935406	0.00563668	0.016669	-0.0670422	0.0503732	NA	NA	NA	-0.119914	0.11661	0.00330413	NA	NA	NA
Q62940	-0.17152	0.0213583	0.150162	-0.2286	0.109307	0.119292	-0.106801	-0.110747	0.217548	-0.00491219	-0.177172	0.182084	-0.0326224	0.047276	-0.0146536
Q62991	NA	NA	NA	NA	NA	NA	NA	NA	NA	-0.00323642	0.0698389	-0.0666025	NA	NA	NA
Q63009	NA	NA	NA	0.0506903	-0.0693829	0.0186926	-0.0691378	0.0664102	0.00272759	-0.20428	0.0821882	0.122092	0.0359189	-0.0598872	0.0239683
Q63028	0.00466069	-0.0406894	0.0360287	-0.0256013	0.10247	-0.0768685	0.00950269	0.0297317	-0.0392344	0.0447005	0.0271334	-0.0718339	0.0349797	-0.0563594	0.0213797
Q63081	-0.198358	0.0647515	0.133607	-0.0100258	-0.025047	0.0350728	-0.0910203	0.0112897	0.0885896	-0.156531	-0.00199447	0.158525	-0.0691211	-0.0329984	0.10212
Q63083	-0.137732	0.0588539	0.0788783	-0.247396	0.110642	0.136753	-0.14392	0.0544701	0.0894497	NA	NA	NA	-0.0119379	-0.0202659	0.0322038
Q63135	0.0430764	0.180925	-0.224001	NA	NA	NA	NA	NA	NA	NA	NA	NA	NA	NA	NA
Q63184	0.111233	-0.190329	0.0790952	0.216278	-0.222413	0.00613484	NA	NA	NA	0.142237	-0.200177	0.0579397	NA	NA	NA
Q63189	1.18844	-0.687465	-0.500979	1.43717	-0.690673	-0.746498	0.9413	-0.209373	-0.731927	0.726509	0.119283	-0.845792	1.02063	0.231653	-1.25229
Q63190	-0.00637091	0.0667124	-0.0603415	0.0838488	-0.0860881	0.00223925	0.13452	0.0658057	-0.200325	NA	NA	NA	NA	NA	NA
Q63228	-0.0130135	-0.0287534	0.0417668	0.0257263	-0.00416447	-0.0215619	0.124953	0.0167657	-0.141719	0.0104318	0.0470422	-0.057474	NA	NA	NA
Q63313	0.0570613	-0.183258	0.126196	-0.121105	0.0772129	0.0438919	-0.0893147	0.0138673	0.0754474	0.214124	-0.35811	0.143987	0.0403571	0.0196521	-0.0600092
Q63347	NA	NA	NA	NA	NA	NA	-0.0532693	-0.00553312	0.0588025	NA	NA	NA	NA	NA	NA
Q63358	NA	NA	NA	0.265738	-0.337515	0.0717762	0.171177	0.00998714	-0.181164	0.0728358	-0.0366946	-0.0361412	0.0308843	0.0264962	-0.0573805
Q63362	NA	NA	NA	-0.0688153	0.108857	-0.0400419	NA	NA	NA	NA	NA	NA	NA	NA	NA
Q63377	0.0334811	0.114469	-0.14795	0.210713	0.0615473	-0.27226	0.0296667	0.134296	-0.163963	-0.141027	0.221202	-0.0801752	-0.10096	0.0423614	0.0585981
Q63396	-0.0214145	-0.0299493	0.0513637	0.164326	-0.0802769	-0.0840488	-0.0230865	0.0867683	-0.0636819	-0.190407	0.0290129	0.161394	0.0722271	-0.120549	0.0483223
Q63433	0.0862885	0.0438658	-0.130154	0.0349848	-0.0043089	-0.0306759	-0.010416	0.0350842	-0.0246682	0.100321	-0.033888	-0.0664335	-0.0642818	0.064589	-0.000307259
Q63448	NA	NA	NA	NA	NA	NA	NA	NA	NA	NA	NA	NA	0.0347004	0.055198	-0.0898984
Q63468	0.109163	-0.102151	-0.00701265	0.186681	-0.053028	-0.133653	NA	NA	NA	NA	NA	NA	NA	NA	NA
Q63493	-0.037814	0.148643	-0.110829	0.131147	-0.0255529	-0.105594	NA	NA	NA	NA	NA	NA	-0.229197	0.0541062	0.175091
Q63507	-0.0773488	0.0160966	0.0612522	0.0170968	-0.0843762	0.0672794	-0.226222	0.0522763	0.173946	-0.312696	0.0698023	0.242894	-0.16075	0.0170899	0.14366
Q63525	-0.11321	-0.00991009	0.12312	-0.0734901	-0.0327825	0.106273	-0.189936	0.0750874	0.114848	-0.207626	0.1301	0.077526	-0.111091	0.0212434	0.0898472
Q63531	-0.00448854	-0.0628528	0.0673413	-0.0140078	-0.0858119	0.0998196	NA	NA	NA	-0.0438165	0.0290377	0.0147787	-0.0655944	0.0377871	0.0278073
Q63569	0.111546	-0.0265787	-0.0849669	-0.00943817	-0.0361199	0.045558	-0.0358055	-0.0226712	0.0584767	-0.0364744	-0.0214767	0.0579511	-0.0217829	0.0231503	-0.0013674
Q63610	0.0390208	-0.0358953	-0.00312553	0.0115264	0.016913	-0.0284394	-0.0239243	-0.0197309	0.0436552	0.110516	-0.0538258	-0.0566899	-0.0226993	-0.00306511	0.0257645
Q63644	0.0647802	-0.0494769	-0.0153033	0.0349653	0.0362381	-0.0712034	0.0477542	-0.0725937	0.0248395	0.131814	-0.0394828	-0.0923308	-0.0319882	0.0437173	-0.0117291
Q63663	0.060478	-0.119371	0.0588928	0.0485612	-0.115555	0.0669942	0.12124	-0.0719976	-0.0492424	-0.051839	0.0214845	0.0303546	0.126604	0.0951065	-0.221711
Q63691	-0.200062	0.054455	0.145607	-0.389417	0.589287	-0.19987	0.0108901	0.206222	-0.217113	-0.156868	-0.289052	0.445919	0.0500071	-0.0566986	0.00669149
Q63692	NA	NA	NA	NA	NA	NA	NA	NA	NA	-0.0271975	-0.00334603	0.0305436	NA	NA	NA
Q63716	-0.0112137	-0.0700303	0.081244	0.208672	-0.376067	0.167395	-0.248992	0.214681	0.0343109	-0.3637	0.233638	0.130062	-0.0919758	-0.0273484	0.119324
Q63768	NA	NA	NA	NA	NA	NA	NA	NA	NA	-0.0403419	-0.0857442	0.126086	0.110358	-0.130431	0.0200728
Q63797	-0.0438508	-0.0716235	0.115474	0.0739104	-0.0338749	-0.0400355	-0.0207402	-0.0712522	0.0919924	-0.0632423	-0.0694958	0.132738	0.0348298	-0.0745119	0.0396821
Q63798	0.0911347	-0.0771484	-0.0139864	0.0570095	-0.139637	0.0826277	-0.0578819	0.107781	-0.0498993	-0.0463472	0.0545104	-0.00890534	0.0189928	-0.0271902	0.00819743
Q63810	0.111891	0.0412151	-0.153106	0.0640108	-0.15471	0.0906991	0.00158692	0.0602402	-0.0618271	0.0520622	-0.0787505	0.0266882	NA	NA	NA
Q63921	-0.135056	0.156415	-0.0213595	-0.242484	0.32057	-0.0780863	0.0377188	-0.0390994	0.00138054	0.165647	-0.0555778	-0.110069	0.0888825	-0.0698162	-0.0190663
Q63942	-0.10171	0.0969589	0.00475135	-0.280606	0.122367	0.158239	-0.035406	0.0371751	-0.00176906	0.0875819	0.00342486	-0.0910068	-0.0950812	0.0320372	0.063044
Q63945	-0.0599701	-0.0320626	0.0920327	0.0664449	-0.0500423	-0.0164026	-0.116226	0.0942946	0.0219315	-0.261382	0.0351361	0.226246	-0.0398748	-0.0705145	0.110389
Q63965	0.0744369	-0.022705	-0.0517319	0.123915	-0.00677798	-0.117137	NA	NA	NA	0.0948247	0.0919041	-0.186729	NA	NA	NA
Q64012	-0.0865421	0.00702957	0.0795125	0.0258657	-0.130733	0.104868	-0.11659	0.0751828	0.0414074	-0.252601	0.0314786	0.221123	0.0351454	-0.0645524	0.029407
Q640N3	0.049893	0.0323431	-0.0822361	0.0524312	-0.0543054	0.00187417	NA	NA	NA	0.127874	-0.0175542	-0.110319	0.0295423	-0.0154476	-0.0140948
Q64152	NA	NA	NA	-0.0360396	-0.0820898	0.118129	-0.0349883	-0.024441	0.0594293	-0.205885	-0.0912312	0.297116	NA	NA	NA
Q64194	0.00362032	0.209339	-0.21296	NA	NA	NA	NA	NA	NA	NA	NA	NA	NA	NA	NA
Q641X3	0.00582735	-0.0293988	0.0235714	0.145499	-0.129606	-0.0158928	0.00558393	-0.017228	0.0116441	0.0671058	-0.0316316	-0.0354742	-0.0122266	0.0682527	-0.0560261
Q641Y5	0.0657841	0.0116219	-0.077406	0.0793824	-0.0628215	-0.0165609	0.247768	0.0199507	-0.267718	0.0353003	0.0738559	-0.109156	-0.0192365	0.113094	-0.0938574
Q641Y8	0.0346969	0.0253247	-0.0600216	0.0300212	0.0141311	-0.0441523	-0.0340579	0.0980981	-0.0640402	-0.128633	-0.0624584	0.191091	-0.025125	0.0581967	-0.0330717
Q64213	0.0232848	0.00480768	-0.0280925	0.0559283	-0.132841	0.076913	-0.0624579	0.0389284	0.0235295	-0.0211038	-0.0270333	0.0481371	-0.106532	0.0885395	0.017992
Q64232	-0.0645798	0.109395	-0.0448152	-0.0412774	0.0541076	-0.0128302	-0.0426408	0.00536793	0.0372729	-0.0757365	0.0239023	0.0518342	-0.0206644	-0.0273939	0.0480583
Q64303	0.000684961	0.0167703	-0.0174553	0.0110397	0.0222431	-0.0332828	8.52e-05	0.00436292	-0.00444808	0.076896	-0.00199618	-0.0748998	0.0165142	-0.0177227	0.00120848
Q64310	0.0171069	0.0493789	-0.0664858	-0.0974513	0.224655	-0.127204	-0.00831487	0.159068	-0.150754	-0.122456	0.118944	0.00351252	NA	NA	NA
Q64399	0.105772	-0.00279131	-0.102981	0.116771	-0.0740174	-0.0427535	0.0249545	0.042139	-0.0670935	NA	NA	NA	0.041971	-0.10345	0.0614792
Q64428	0.0157217	0.0580737	-0.0737953	0.0374832	0.0493935	-0.0868768	-0.0398669	-0.0257216	0.0655884	-0.131213	-0.00473045	0.135943	-0.0953719	0.0294869	0.065885
Q64455	0.0833056	0.134642	-0.217948	-0.037878	0.0593397	-0.0214617	-0.0520278	0.0846869	-0.032659	0.017189	0.0814789	-0.0986679	0.0376883	-0.0159669	-0.0217214
Q64478	NA	NA	NA	NA	NA	NA	0.0194833	-0.00428546	-0.0151978	NA	NA	NA	NA	NA	NA
Q64511	NA	NA	NA	NA	NA	NA	NA	NA	NA	-0.0323154	0.0252671	0.00704834	NA	NA	NA
Q64518	NA	NA	NA	-0.067254	0.151479	-0.0842255	NA	NA	NA	NA	NA	NA	NA	NA	NA
Q64523	-0.33719	0.0175867	0.319603	0.0336088	0.161178	-0.194786	NA	NA	NA	NA	NA	NA	0.110666	0.0837551	-0.194421
Q64524	0.0471904	0.0729489	-0.120139	NA	NA	NA	NA	NA	NA	NA	NA	NA	NA	NA	NA
Q64525	NA	NA	NA	0.138573	-0.0143087	-0.124264	NA	NA	NA	NA	NA	NA	NA	NA	NA
Q64531	0.0420081	-0.0330633	-0.00894477	0.0424188	0.0301819	-0.0726007	0.0217582	0.055094	-0.0768522	0.0381083	0.0229491	-0.0610574	0.0343726	-0.0172172	-0.0171554
Q64537	0.0747446	-0.0588653	-0.0158793	0.0410829	-0.00977544	-0.0313075	0.0310516	-0.11192	0.0808681	0.0420931	0.128339	-0.170432	NA	NA	NA
Q64560	0.0532622	-0.086763	0.0335008	0.0397534	-0.0258278	-0.0139256	0.0333042	-0.145505	0.1122	0.112286	0.0467013	-0.158987	0.0504197	-0.0241009	-0.0263188
Q64598	NA	NA	NA	0.11347	0.0244488	-0.137919	-0.00480271	-0.0551523	0.059955	0.0560169	0.145644	-0.201661	NA	NA	NA
Q64633	0.141798	0.0293911	-0.171189	NA	NA	NA	NA	NA	NA	NA	NA	NA	NA	NA	NA
Q64640	NA	NA	NA	0.264248	-0.25336	-0.0108884	NA	NA	NA	NA	NA	NA	NA	NA	NA
Q64674	-0.0400509	0.0238957	0.0161552	NA	NA	NA	0.150855	-0.0408067	-0.110048	0.0990395	-0.0302611	-0.0687784	NA	NA	NA
Q64725	0.0196359	-0.00730537	-0.0123305	0.00699274	0.0429154	-0.0499082	-0.0197121	-0.0248949	0.044607	-0.00853535	-0.00454053	0.0130759	-0.0872052	0.0193797	0.0678255
Q64737	0.132021	-0.0121387	-0.119882	0.175529	-0.242151	0.0666216	0.155522	-0.0762639	-0.0792577	NA	NA	NA	-0.0164222	0.00358206	0.0128401
Q66H12	0.048836	0.00860122	-0.0574372	0.168893	-0.104021	-0.0648725	-0.0239086	0.098355	-0.0744464	-0.106584	0.0730185	0.0335655	NA	NA	NA
Q66H76	0.0390128	-0.0589476	0.0199348	0.00442556	-0.00352106	-0.000904502	0.00536467	0.0115874	-0.0169521	0.0536599	0.0104474	-0.0641072	-0.0696147	0.00631741	0.0632973
Q66HC5	NA	NA	NA	0.04726	-0.065876	0.018616	NA	NA	NA	-0.0916734	0.0694554	0.0222179	NA	NA	NA
Q66HD0	-0.138968	0.0464221	0.092546	NA	NA	NA	-0.118066	0.027104	0.0909622	NA	NA	NA	-0.0586916	-0.00889125	0.0675828
Q66HD3	-0.0987552	-0.0818279	0.180583	-0.112949	-0.073983	0.186932	NA	NA	NA	NA	NA	NA	NA	NA	NA
Q66HF1	0.042409	-0.00721234	-0.0351967	0.132158	-0.0704344	-0.0617239	-0.0263739	0.135841	-0.109467	-0.196866	0.0896863	0.10718	0.0302232	-0.0563172	0.026094
Q66HF9	0.0676874	-0.00166353	-0.0660239	0.0471529	-0.0296583	-0.0174946	0.0531705	-0.0208959	-0.0322746	0.131609	0.00220417	-0.133813	0.0491714	-0.0112833	-0.0378881
Q66HG8	NA	NA	NA	NA	NA	NA	NA	NA	NA	-0.0616835	0.0213888	0.0402947	0.0493184	-0.0455925	-0.00372597
Q66HR0	NA	NA	NA	NA	NA	NA	NA	NA	NA	0.108067	-0.0441882	-0.0638793	NA	NA	NA
Q66HR2	-0.0443689	-0.044489	0.0888579	-0.043813	-0.0180853	0.0618983	-0.0264042	-0.0262901	0.0526943	-0.0451305	0.028303	0.0168275	-0.0069114	-0.00637331	0.0132847
Q66X93	-0.0840833	-0.0332544	0.117338	-0.0311228	-0.0578292	0.0889521	-0.162727	-0.0680318	0.230759	-0.123428	-0.00582386	0.129252	-0.0857748	0.0561317	0.0296431
Q68A21	0.0644719	-0.0155156	-0.0489564	-0.00924548	0.0209963	-0.0117509	0.214577	-0.152666	-0.0619109	NA	NA	NA	NA	NA	NA
Q68FL6	0.0180907	-0.0776168	0.0595261	-0.0550873	-0.0631677	0.118255	NA	NA	NA	-0.0360585	-0.102904	0.138963	NA	NA	NA
Q68FP1	0.0661443	0.0231925	-0.0893368	-0.00891194	0.0278824	-0.0189705	0.0374985	-0.0379914	0.000492973	0.177427	-0.0422678	-0.135159	-0.00422282	0.0451214	-0.0408986
Q68FQ0	-0.0138138	0.0348561	-0.0210423	0.0223982	-0.0241577	0.00175954	-0.0414074	0.0460241	-0.00461671	-0.0910992	0.0264204	0.0646788	0.0533443	-0.052004	-0.00134033
Q68FR2	-0.0506252	0.0619311	-0.0113059	0.059734	-0.0681117	0.00837768	0.00426441	-0.0194498	0.0151854	-0.00528837	0.0424674	-0.037179	-0.0118161	0.00554331	0.0062728
Q68FR6	-0.0623406	0.0524645	0.00987609	-0.0145707	-0.00128241	0.0158531	-0.0604023	-0.0190309	0.0794332	-0.0383751	-0.0219294	0.0603044	-0.00354577	0.02763	-0.0240843
Q68FR9	-0.0351192	-0.00207814	0.0371974	0.0126761	-0.0156117	0.00293563	-0.056629	0.0217681	0.0348609	-0.07206	-0.0335375	0.105597	-0.0157756	0.00611505	0.00966054
Q68FS1	-0.0140454	-0.0685075	0.0825529	0.00208862	-0.0373992	0.0353106	NA	NA	NA	-0.247734	0.159135	0.0885987	-0.0351506	0.0208807	0.0142699
Q68FS4	0.118166	-0.0194179	-0.0987476	0.0888172	-0.114809	0.0259917	-0.163085	0.275142	-0.112058	-0.0983173	0.134189	-0.0358718	0.0167216	-0.0165793	-0.000142287
Q68FU3	-0.120097	0.179065	-0.0589678	-0.118753	0.125755	-0.00700117	-0.0600273	-0.00212854	0.0621558	-0.0735371	0.0799595	-0.0064224	-0.0129641	-0.0388625	0.0518266
Q68FX0	NA	NA	NA	NA	NA	NA	NA	NA	NA	-0.195232	-0.0295474	0.224779	0.0129555	0.0183412	-0.0312967
Q68FX1	-0.0250213	0.0285044	-0.00348311	0.0578346	-0.101904	0.0440692	NA	NA	NA	-0.0147908	0.0515748	-0.0367839	NA	NA	NA
Q68FY0	-0.0814224	0.114832	-0.0334096	0.0560435	0.0626098	-0.118653	-0.0791874	0.0751047	0.00408267	-0.144423	0.0931614	0.051262	0.00305771	0.0198568	-0.0229145
Q69ZK0	0.225687	0.0216104	-0.247298	NA	NA	NA	NA	NA	NA	0.161209	-0.0114889	-0.149721	0.212585	-0.0346265	-0.177959
Q69ZN7	-0.0279663	0.181141	-0.153175	-0.170747	0.135878	0.0348694	-0.067575	0.000364521	0.0672105	-0.00828286	0.0383869	-0.0301041	NA	NA	NA
Q6A028	NA	NA	NA	0.132072	0.0179316	-0.150003	NA	NA	NA	0.0740467	-0.0162745	-0.0577722	0.0627807	0.0624095	-0.12519
Q6AXM8	-0.152412	0.287899	-0.135488	NA	NA	NA	NA	NA	NA	NA	NA	NA	NA	NA	NA
Q6AXN3	NA	NA	NA	NA	NA	NA	NA	NA	NA	NA	NA	NA	0.0320396	-0.0534131	0.0213735
Q6AXQ0	-0.0167999	0.0402109	-0.023411	-0.0534449	0.0460766	0.00736833	-0.0709581	0.00467507	0.066283	-0.31105	0.120538	0.190512	NA	NA	NA
Q6AXR4	0.0467314	0.00313251	-0.0498639	0.00206582	0.109842	-0.111908	0.00455279	-0.00379654	-0.000756251	0.132991	0.0209156	-0.153906	0.0598779	-0.0397056	-0.0201723
Q6AXS3	0.0207729	0.00998998	-0.0307629	0.0645185	0.00101735	-0.0655358	-0.032284	0.0870656	-0.0547816	-0.121716	0.0338898	0.0878258	0.00446547	-0.00729997	0.0028345
Q6AXS5	-0.158557	-0.00977368	0.16833	-0.0365446	-0.115772	0.152317	-0.111737	-0.0605284	0.172265	-0.325203	0.0681642	0.257039	-0.0549221	-0.0217966	0.0767188
Q6AXS9	-0.213272	0.013576	0.199696	-0.209436	0.0960776	0.113358	-0.145778	0.0223381	0.12344	0.0804933	-0.137413	0.0569193	-0.201101	0.086466	0.114635
Q6AXT8	-0.00187277	-0.00403656	0.00590933	0.0391378	-0.139008	0.0998705	NA	NA	NA	-0.165243	0.0403315	0.124912	0.0463121	-0.126393	0.0800807
Q6AXU6	0.133505	-0.0990529	-0.0344522	0.0726073	-0.100778	0.028171	NA	NA	NA	NA	NA	NA	NA	NA	NA
Q6AY20	NA	NA	NA	0.0772628	-0.112621	0.0353578	NA	NA	NA	NA	NA	NA	0.000113596	0.0408915	-0.0410051
Q6AY41	0.143834	0.0184927	-0.162327	0.0923174	0.0305278	-0.122845	0.0837576	-0.00293976	-0.0808179	NA	NA	NA	-0.074786	0.0933697	-0.0185837
Q6AYA1	0.0672835	-0.0325954	-0.0346881	0.198901	-0.116574	-0.0823273	NA	NA	NA	NA	NA	NA	NA	NA	NA
Q6AYC4	0.0176774	-0.0571031	0.0394257	0.046283	-0.0693176	0.0230346	-0.00529617	0.085348	-0.0800519	-0.0307961	0.109254	-0.0784582	-0.00179298	0.0283915	-0.0265985
Q6AYC5	NA	NA	NA	-0.122192	0.0706166	0.0515759	-0.023413	-0.0547433	0.0781563	NA	NA	NA	0.00982467	0.0174067	-0.0272313
Q6AYD6	NA	NA	NA	NA	NA	NA	NA	NA	NA	0.0371173	0.00704309	-0.0441604	NA	NA	NA
Q6AYE2	0.123427	0.0347768	-0.158204	0.111046	0.00388102	-0.114927	0.0590201	0.108059	-0.167079	-0.106035	0.0764263	0.0296088	0.0757898	0.0208819	-0.0966717
Q6AYG3	NA	NA	NA	-0.0219572	-0.126049	0.148007	NA	NA	NA	0.267417	-0.294042	0.0266251	0.178792	0.0315326	-0.210325
Q6AYH5	0.0505519	0.00409793	-0.0546498	0.0283701	-0.0789132	0.0505431	0.0961773	-0.0985382	0.00236098	-0.0432625	0.0771735	-0.033911	-0.0239445	0.0425252	-0.0185808
Q6AYJ8	0.131256	-0.0413034	-0.0899526	-0.0865319	-0.021628	0.10816	0.0520231	0.105404	-0.157427	0.0759921	-0.191023	0.115031	0.0507403	-0.0802556	0.0295152
Q6AYK1	-0.111298	0.0051693	0.106129	NA	NA	NA	NA	NA	NA	NA	NA	NA	NA	NA	NA
Q6AYK6	-0.108811	0.0204759	0.0883348	-0.0605883	0.0297273	0.0308609	-0.0625501	0.0677436	-0.00519341	-0.179364	0.108697	0.0706667	-0.00770026	0.0499703	-0.04227
Q6AYR6	NA	NA	NA	0.0674228	0.0381815	-0.105604	-0.0511468	0.210902	-0.159755	NA	NA	NA	NA	NA	NA
Q6AYS8	0.00615487	-0.182911	0.176756	NA	NA	NA	-0.03383	0.241029	-0.207199	NA	NA	NA	0.102999	-0.123127	0.0201273
Q6AYT7	0.0776225	0.160902	-0.238525	-0.242045	0.123782	0.118263	-0.0233473	0.0277474	-0.00440005	-0.0248192	-0.0903618	0.115181	NA	NA	NA
Q6AYZ1	-0.0472162	0.00877268	0.0384436	-0.0971032	0.0316397	0.0654634	-0.0450605	0.053306	-0.00824548	NA	NA	NA	0.00246411	-0.0668084	0.0643443
Q6AZ50	NA	NA	NA	-0.0357656	0.0570614	-0.0212958	NA	NA	NA	0.099952	-0.00702435	-0.0929277	0.0181806	0.0174168	-0.0355973
Q6B345	0.0254925	-0.125479	0.0999866	-0.12442	0.0861984	0.0382215	0.0356643	0.0392951	-0.0749594	0.114234	-0.104363	-0.00987102	-0.117003	0.0439499	0.0730534
Q6BCL1	-0.0902797	0.04761	0.0426697	-0.0797402	0.00793169	0.0718085	0.000332127	-0.0956276	0.0952955	0.0745071	-0.0284712	-0.0460358	-0.0329748	0.0281796	0.00479513
Q6BDS1	NA	NA	NA	-0.0848897	0.152566	-0.0676764	0.0552156	-0.278819	0.223603	NA	NA	NA	NA	NA	NA
Q6DGG0	-0.0394567	0.0265145	0.0129422	-0.0388376	-0.0183264	0.057164	-0.129097	0.0364976	0.105828	-0.0526137	0.0134893	0.0391244	0.0190675	-0.0446667	0.0255993
Q6GQP4	0.0726277	-0.0623366	-0.010291	-0.121698	0.143555	-0.021857	0.173951	-0.176155	0.00220338	0.107837	-0.121098	0.0132608	-0.0589911	-0.0349769	0.093968
Q6GQT9	NA	NA	NA	-0.0566335	0.0356654	0.0209681	NA	NA	NA	-0.101801	0.0905159	0.0112855	NA	NA	NA
Q6IFW6	0.777955	0.161397	-0.939352	NA	NA	NA	-0.338506	0.652918	-0.314412	-0.172279	-0.0631651	0.235445	-0.118842	-0.143757	0.262599
Q6IMF3	0.624659	0.160586	-0.785245	0.293731	-0.272196	-0.0215343	-0.571052	0.933876	-0.362824	-0.0117805	0.0991354	-0.0873549	-0.17648	-0.0867748	0.263254
Q6IN36	0.0760012	-0.0182795	-0.0577217	0.11744	-0.0300073	-0.0874323	0.0500249	0.0228673	-0.0728922	0.0539369	0.0641595	-0.118096	0.0449668	0.0426078	-0.0875746
Q6IRK9	0.219487	-0.0934384	-0.126049	0.399729	-0.174604	-0.225124	NA	NA	NA	-0.167728	0.165399	0.0023292	0.193353	-0.215114	0.0217611
Q6IUU3	0.0468127	0.00330539	-0.0501181	-0.191333	0.393484	-0.202151	0.123433	-0.0819573	-0.0414761	0.031653	-0.0959892	0.0643361	0.239534	0.0840713	-0.311595
Q6LDZ8	0.0600944	-0.057875	-0.00221938	0.0114148	-0.117446	0.106031	-0.00199083	-0.0121754	0.0141662	NA	NA	NA	NA	NA	NA
Q6MG08	NA	NA	NA	NA	NA	NA	NA	NA	NA	-0.101232	-0.0880674	0.189299	NA	NA	NA
Q6MG14	0.120305	-0.403271	0.282966	-0.0333799	0.152115	-0.118735	NA	NA	NA	0.208313	-0.016938	-0.191375	NA	NA	NA
Q6MG49	0.0258768	0.136205	-0.162082	NA	NA	NA	NA	NA	NA	NA	NA	NA	0.000728053	-0.126311	0.125583
Q6MG61	-0.0198879	0.0754642	-0.0555763	-0.12362	0.125649	-0.00202852	0.0717082	-0.0619534	-0.00975481	0.0370116	0.00409535	-0.041107	0.0131202	-0.0210358	0.00791552
Q6MG88	0.080894	0.0554072	-0.136301	0.113888	0.129883	-0.243772	0.198013	-0.064792	-0.133221	-0.0644428	0.388805	-0.324363	-0.0329227	0.23789	-0.204967
Q6NV83	NA	NA	NA	-0.0106115	-0.0665025	0.0771141	NA	NA	NA	NA	NA	NA	NA	NA	NA
Q6NVF9	NA	NA	NA	0.00356363	0.0231177	-0.0266813	0.0216491	-0.0369827	0.0153336	NA	NA	NA	-0.105895	0.0608082	0.0450872
Q6NX65	-0.0389263	0.0153908	0.0235355	0.116783	-0.0373058	-0.0794771	-0.0532301	0.0210226	0.0322075	0.00960435	0.0514365	-0.0610409	0.00710868	-0.0314977	0.024389
Q6NZB0	NA	NA	NA	-0.0292389	-0.0509487	0.0801876	-0.016885	-0.0536494	0.0705344	-0.155523	-0.0880226	0.243545	0.0261479	-0.0326288	0.00648089
Q6NZJ6	NA	NA	NA	NA	NA	NA	-0.142829	0.0433375	0.099492	NA	NA	NA	NA	NA	NA
Q6P069	0.0977375	-0.0543202	-0.0434173	-0.0875307	0.0889073	-0.00137659	0.131759	-0.0652477	-0.0665116	0.0973109	-0.0159731	-0.0813378	-0.0822482	0.0230233	0.0592249
Q6P2B1	0.392934	-0.0231707	-0.381349	0.0765233	-0.0151347	-0.0613886	NA	NA	NA	0.0897924	-0.0841984	-0.00559397	0.168891	-0.0288335	-0.140057
Q6P4T2	0.0830849	0.0314087	-0.114494	0.00969008	-0.0387824	0.0290923	-0.0324729	0.132715	-0.100242	-0.197254	0.0789346	0.118319	0.0211618	-0.0497653	0.0286036
Q6P502	-0.00297003	0.00252161	0.00044842	NA	NA	NA	-0.0739362	0.0552274	0.0187088	NA	NA	NA	NA	NA	NA
Q6P542	0.113957	0.00133988	-0.115297	0.109891	-0.224152	0.114261	-0.109178	0.032706	0.0764718	NA	NA	NA	-0.0335355	0.0979452	-0.0644097
Q6P5F9	0.0252042	-0.000870452	-0.0243337	-0.0724205	0.0195889	0.0528316	NA	NA	NA	NA	NA	NA	0.00177273	-0.0239325	0.0221597
Q6P686	0.07731	-0.0232667	-0.0540433	-0.0420504	0.0176351	0.0244153	0.01572	0.084404	-0.100124	0.0679961	0.0216056	-0.0896017	-0.0425409	0.0857914	-0.0432505
Q6P6Q2	0.601883	0.0154164	-0.6173	NA	NA	NA	-0.443677	0.693453	-0.249776	NA	NA	NA	NA	NA	NA
Q6P6R2	0.0124263	0.053909	-0.0663353	0.0538362	0.0498488	-0.103685	0.0548069	-0.0532985	-0.00150835	0.00309977	-0.0415708	0.038471	0.0256783	-0.0293252	0.0036469
Q6P6T4	0.042906	-0.0322597	-0.0106463	-0.00603138	-0.0629228	0.0689542	0.0311978	0.0187734	-0.0499712	0.132612	-0.0337311	-0.0988811	-0.000317945	-0.0985718	0.0988898
Q6P6U0	0.0971254	0.0210584	-0.118184	0.0485984	0.0120251	-0.0606235	0.0790965	-0.0124939	-0.0666027	0.091026	0.0247915	-0.115818	-0.00997106	0.0257759	-0.0158048
Q6P6V0	0.0150756	-0.0581623	0.0430866	-0.00495701	-0.0281116	0.0330687	0.0748473	-0.0687794	-0.00606783	0.068219	-0.127704	0.0594855	-0.0134929	-0.0460214	0.0595143
Q6P747	0.096618	-0.0362602	-0.0603578	0.11343	-0.058676	-0.0547543	0.0696113	-0.000911698	-0.0686996	-0.0420153	0.0169513	0.0250641	0.0507399	-0.0606149	0.009875
Q6P756	-0.0108512	-0.0442712	0.0551224	-0.0994352	-0.0178012	0.117236	NA	NA	NA	-0.0319318	0.0580441	-0.0261123	-0.0510751	0.0284179	0.0226571
Q6P791	-0.0033696	0.0630037	-0.0596341	-0.098043	0.0850912	0.0129518	-0.0417106	0.00944425	0.0322663	-0.0225059	-0.0563535	0.0788594	-0.132247	0.0945241	0.0377232
Q6P799	-0.0935332	0.0381846	0.0553487	-0.0348604	0.0117788	0.0230816	-0.023122	0.0957243	-0.0726023	-0.0130246	0.0583472	-0.0453227	0.0256091	0.00947987	-0.0350889
Q6P7B0	NA	NA	NA	NA	NA	NA	NA	NA	NA	0.00998178	0.0054557	-0.0154375	NA	NA	NA
Q6P7Q4	NA	NA	NA	NA	NA	NA	NA	NA	NA	-0.373247	0.226829	0.146418	NA	NA	NA
Q6P7R8	-0.0596407	0.0344858	0.0251549	-0.174539	0.146287	0.0282523	0.161115	0.00728772	-0.168403	-0.273397	0.0702677	0.203129	0.063388	-0.127316	0.063928
Q6P7S1	0.0320998	0.0770928	-0.109193	-0.0367201	0.0702825	-0.0335624	0.00109547	0.139316	-0.140411	0.177804	0.00263119	-0.180436	-0.081696	0.0353554	0.0463406
Q6P8I4	0.00603981	-0.0394851	0.0334453	0.0530689	-0.0614448	0.00837587	0.0137013	-0.0174153	0.00371396	-0.033008	0.0461265	-0.0131185	-0.0421501	0.0170606	0.0250895
Q6P8X1	0.0885119	-0.0167868	-0.071725	0.0168149	-0.113954	0.0971387	0.00748286	0.145286	-0.152769	0.0478627	0.0238923	-0.0717551	-0.0156812	-0.0325176	0.0481988
Q6P9R2	0.0720237	-0.0362476	-0.0357762	-0.0165384	0.0274131	-0.0108746	NA	NA	NA	0.183598	-0.0189558	-0.164643	0.140272	-0.0685372	-0.071735
Q6P9U8	-0.154995	0.0446207	0.110375	-0.043943	-0.0285508	0.0724938	-0.0409854	0.0107754	0.03021	-0.0956113	0.0174225	0.0781888	0.0295515	-0.0370912	0.00753972
Q6PCT3	0.0383163	0.047973	-0.0862892	0.00499096	0.0318498	-0.0368408	0.00985167	0.0168392	-0.0266909	0.0461738	0.0583336	-0.104507	0.0211882	0.0455826	-0.0667709
Q6PD03	0.149766	-0.0876098	-0.0621558	0.01864	-0.00556796	-0.013072	0.051234	0.0287166	-0.0799506	0.0870757	0.0305339	-0.11761	-0.123926	0.0115317	0.112395
Q6PDG5	0.0218683	0.0191916	-0.0410599	-0.0225073	-0.0358594	0.0583667	0.0551954	-0.00978296	-0.0454124	-0.155712	0.107348	0.0483645	0.00946814	-0.122726	0.113257
Q6PDI5	0.0362459	-0.0070807	-0.0291652	-0.0272398	0.00418157	0.0230582	0.0479342	0.0792622	-0.127196	-0.112068	-0.0174873	0.129555	0.0154411	0.00238481	-0.0178259
Q6PDM2	-0.0463363	-0.00161939	0.0479557	0.0501797	-0.0544808	0.00430107	-0.0119703	0.0235118	-0.0115415	-0.113432	0.0561838	0.0572486	-0.000549994	-0.0178095	0.0183595
Q6PDQ2	-0.0614205	0.00873908	0.0526814	0.0102892	-0.0338157	0.0235265	-0.0207101	-0.0135474	0.0342575	-0.126629	0.0285689	0.09806	-0.0220178	-0.0477272	0.069745
Q6PDU7	0.0100397	0.139485	-0.149525	0.098509	0.0400101	-0.138519	0.0466868	0.00416044	-0.0508472	NA	NA	NA	-0.119336	0.0950317	0.024304
Q6PEC0	0.479364	-0.362926	-0.116438	NA	NA	NA	NA	NA	NA	NA	NA	NA	0.0636977	-0.00667033	-0.0570274
Q6PEC1	-0.051664	-0.0315368	0.0832008	-0.0527234	0.0219571	0.0307663	-0.00252946	-0.0745682	0.0770977	-0.111017	0.113508	-0.00249121	-0.0348647	-0.0563854	0.09125
Q6PFR5	0.0861183	0.0557065	-0.141825	NA	NA	NA	NA	NA	NA	-0.00510945	-0.0389692	0.0440786	NA	NA	NA
Q6PGB8	NA	NA	NA	NA	NA	NA	-0.0722079	0.124415	-0.0522074	NA	NA	NA	NA	NA	NA
Q6PGG2	0.0934135	-0.0275408	-0.0658726	-0.126141	0.0773561	0.0487848	0.00507037	-0.0241785	0.0191081	0.0993843	-0.0764427	-0.0229416	0.0106284	0.011139	-0.0217675
Q6PHN9	NA	NA	NA	NA	NA	NA	NA	NA	NA	NA	NA	NA	0.0616918	-0.0219667	-0.0397251
Q6Q0N1	-0.0636141	-0.0263538	0.0899679	0.204816	-0.265196	0.0603803	0.0163457	0.0982899	-0.114636	-0.168547	0.191726	-0.0231792	-0.0629042	0.0621294	0.000774806
Q6QA69	-0.134748	0.0993397	0.0354081	NA	NA	NA	NA	NA	NA	NA	NA	NA	NA	NA	NA
Q6QMZ8	-0.210786	0.0156661	0.19512	0.0470565	-0.201021	0.153964	-0.222834	0.0760828	0.146751	-0.445415	0.134272	0.311143	-0.125996	-0.00912918	0.135125
Q6RJR6	-0.122679	0.085006	0.0376731	-0.0574974	0.0600596	-0.00256228	0.035891	-0.0728947	0.0370037	0.0163114	-0.0423796	0.0260682	-0.044917	-0.0228636	0.0677806
Q6S9C5	-0.17584	-0.446869	0.622709	-0.0823059	-0.480045	0.562351	-0.370546	-0.313288	0.683834	-0.0551587	-0.350341	0.405499	-0.239693	-0.285319	0.525012
Q6TUG0	-0.0335114	-0.0408498	0.0743612	-0.0345539	-0.0142006	0.0487545	0.0215349	-0.0744977	0.0529628	NA	NA	NA	-0.0767389	0.0628337	0.0139052
Q6UPR8	0.0579379	-0.0175084	-0.0404295	0.0261082	-0.0144187	-0.0116896	0.00469248	0.0132395	-0.017932	0.0501972	-0.0076977	-0.0424995	NA	NA	NA
Q6VBQ5	NA	NA	NA	0.242047	-0.0472469	-0.1948	0.271936	0.0477974	-0.319734	0.127103	0.0500945	-0.177198	0.113384	-0.075678	-0.0377057
Q6WVG3	0.230461	-0.0923654	-0.138096	0.449622	-0.322332	-0.12729	0.140247	0.134496	-0.274743	-0.0215979	0.160359	-0.138761	0.172071	-0.0557339	-0.116337
Q6X9T7	NA	NA	NA	NA	NA	NA	0.322514	-0.16247	-0.160045	NA	NA	NA	NA	NA	NA
Q6XQN1	-0.105075	0.136853	-0.063555	-0.124103	0.20495	-0.0808466	0.302526	0.00383105	-0.306357	-0.0237368	0.0691719	-0.0454351	NA	NA	NA
Q6ZPZ3	NA	NA	NA	NA	NA	NA	0.0387038	-0.190401	0.151698	NA	NA	NA	NA	NA	NA
Q6ZQ08	0.0272546	0.0552371	-0.0824917	-0.137736	0.0160063	0.12173	NA	NA	NA	-0.0773458	0.0119924	0.0653534	0.121173	0.000649323	-0.121822
Q6ZQA0	0.0332234	-0.011762	-0.0214614	-0.04708	0.0445886	0.0024914	0.0412297	0.0143804	-0.0556102	0.042763	-0.0309772	-0.0117858	-0.0249477	0.0615128	-0.0365651
Q6ZWM4	0.041365	-0.029189	-0.012176	NA	NA	NA	-0.0400785	0.159494	-0.119415	-0.0466589	0.0497546	-0.00309566	-0.0227458	-0.0968475	0.119593
Q6ZWN5	-0.118927	-0.0177255	0.136653	0.027291	-0.137604	0.110313	-0.275428	0.134538	0.14089	-0.335253	0.103502	0.231751	-0.118641	-0.00174508	0.120386
Q6ZWR6	0.0510672	0.0158216	-0.0668888	-0.0663355	0.068733	-0.00239748	0.065987	-0.0277725	-0.0382146	0.0327623	0.0204201	-0.0531824	-0.00816308	-0.0193625	0.0275255
Q6ZWU9	-0.178183	0.022598	0.155585	-0.0977264	-0.239318	0.337044	-0.273883	0.0084707	0.265413	-0.189858	-0.115989	0.305846	-0.156616	-0.02639	0.183006
Q6ZWV3	-0.0869596	-0.0438173	0.130777	0.0100639	-0.123393	0.113329	-0.233046	0.164333	0.0687136	-0.350236	0.133541	0.216695	-0.0473562	-0.0156005	0.0629567
Q6ZWV7	-0.145136	-0.0987167	0.243853	0.00163476	-0.188765	0.18713	-0.234706	0.0926488	0.142057	-0.318857	0.0707034	0.248154	-0.0798962	-0.0720753	0.151971
Q6ZWX6	0.00988429	-0.0620229	0.0521386	-0.00501171	-0.000217019	0.00522873	-0.1124	0.0292355	0.0831646	-0.0155313	-0.0242301	0.0397614	-0.0557212	-0.0192343	0.0749555
Q6ZWY9	NA	NA	NA	NA	NA	NA	NA	NA	NA	-0.127993	0.277616	-0.149623	-0.0149103	-0.0348166	0.0497269
Q711G3	NA	NA	NA	NA	NA	NA	-0.076345	0.113708	-0.0373631	NA	NA	NA	NA	NA	NA
Q76B40	-0.0340239	-0.058842	0.0928659	-0.0119401	-0.0419378	0.0538779	NA	NA	NA	0.0218815	0.0522924	-0.0741739	0.00282323	0.0346951	-0.0375183
Q76EI6	NA	NA	NA	NA	NA	NA	NA	NA	NA	0.236678	-0.0781338	-0.158544	NA	NA	NA
Q76MZ3	0.0857861	-0.0276072	-0.0581789	0.0545442	-0.0356651	-0.0188791	0.0106441	0.0627998	-0.0734439	0.00547172	0.0250181	-0.0304898	0.0479908	-0.0340041	-0.0139867
Q78ZA7	0.00986315	-0.0137615	0.00389835	NA	NA	NA	NA	NA	NA	NA	NA	NA	NA	NA	NA
Q791V5	0.126386	0.117468	-0.243855	NA	NA	NA	NA	NA	NA	-0.0104812	-0.0599762	0.0704574	-0.032248	-0.00389714	0.0361451
Q7M0E3	0.058699	-0.0847296	0.0260306	-0.0395931	0.111134	-0.0715411	-0.0192599	0.217177	-0.197917	0.0938188	0.0920475	-0.185866	-0.0197333	0.171676	-0.151943
Q7M767	0.122981	0.00806166	-0.131043	NA	NA	NA	NA	NA	NA	NA	NA	NA	0.0166912	0.00960971	-0.0263009
Q7TMK9	-0.0746387	-0.0502501	0.124889	0.0202508	-0.113974	0.0937227	-0.100004	0.110905	-0.010901	-0.206958	0.0333481	0.17361	-0.0515706	-0.0290645	0.0806351
Q7TMY8	NA	NA	NA	NA	NA	NA	NA	NA	NA	NA	NA	NA	0.149143	-0.123214	-0.0259288
Q7TN29	0.0559039	0.0407864	-0.0966903	0.0403469	0.0517077	-0.0920546	NA	NA	NA	0.0470071	0.0642211	-0.111228	0.0346948	0.0838848	-0.11858
Q7TNC4	0.0148106	-0.00347685	-0.0113337	-0.0703914	-0.0023125	0.0727039	-0.034467	0.0666874	-0.0322203	-0.0989884	0.0521601	0.0468283	-0.00214971	-0.013925	0.0160747
Q7TP48	-0.00174084	-0.0130664	0.0148073	NA	NA	NA	0.117658	0.0107391	-0.128397	0.0468591	0.0201147	-0.0669738	-0.0257272	-0.00734569	0.0330729
Q7TPB1	0.00799574	0.000254127	-0.00824987	0.00737992	-0.0149742	0.00759429	NA	NA	NA	NA	NA	NA	NA	NA	NA
Q7TPD0	NA	NA	NA	-0.100465	0.10597	-0.00550449	NA	NA	NA	-0.00536385	-0.0522357	0.0575995	NA	NA	NA
Q7TPH6	NA	NA	NA	NA	NA	NA	NA	NA	NA	NA	NA	NA	-0.0138697	-0.0958272	0.109697
Q7TQI3	0.0176991	0.0233445	-0.0410436	-0.0352825	0.0274221	0.00786043	-0.00229204	0.0712298	-0.0689378	-0.0323029	-0.0883088	0.120612	-0.0155454	-0.0284457	0.0439911
Q7TSI3	0.0648929	-0.114414	0.0495214	0.0735715	0.00376223	-0.0773338	0.0738871	0.0341309	-0.108018	0.224241	0.0690291	-0.29327	0.162808	-0.0623226	-0.100485
Q7TSV4	NA	NA	NA	0.017766	0.0912847	-0.109051	-0.118787	-0.0775492	0.196336	0.0320741	0.0119834	-0.0440575	0.0446611	-0.00876854	-0.0358925
Q80SW1	0.0585858	-0.164137	0.105551	-0.0315065	-0.0321703	0.0636768	0.0842821	-0.000556284	-0.0837258	-0.0116831	-0.0466234	0.0583065	-0.0292817	0.0700383	-0.0407566
Q80SZ7	-0.0388554	0.108791	-0.0699354	NA	NA	NA	-0.161892	0.147069	0.0148226	NA	NA	NA	0.0163632	0.0232299	-0.0395931
Q80T18	0.00943565	-0.0960766	0.0866409	-0.00161263	0.0153506	-0.013738	-0.0181614	0.00138122	0.0167802	0.0528135	-0.0972146	0.044401	-0.048128	-0.00826975	0.0563977
Q80U16	0.0707737	-0.0211742	-0.0495995	-0.109692	0.0423806	0.0673113	-0.110233	0.145143	-0.0349102	0.115423	-0.0535696	-0.0618534	0.116161	-0.0231776	-0.0929831
Q80U96	NA	NA	NA	NA	NA	NA	0.0312631	0.066514	-0.097777	-0.0923854	-0.00531622	0.0977016	NA	NA	NA
Q80UP5	NA	NA	NA	NA	NA	NA	0.236522	-0.11804	-0.118482	0.0340242	-0.170931	0.136907	NA	NA	NA
Q80W54	NA	NA	NA	NA	NA	NA	NA	NA	NA	0.0226701	0.0435469	-0.066217	0.0356398	0.0309186	-0.0665584
Q80WQ2	NA	NA	NA	NA	NA	NA	NA	NA	NA	0.098089	0.0491722	-0.147261	NA	NA	NA
Q80X41	0.0110644	-0.0443401	0.0332757	-0.137099	-0.0566203	0.193719	-0.0612547	0.0490068	0.0122479	-0.282653	0.101218	0.181435	-0.0248861	-0.0883785	0.113265
Q80X50	NA	NA	NA	NA	NA	NA	-0.117968	-0.0319365	0.149904	NA	NA	NA	NA	NA	NA
Q80X82	0.0607396	0.0994891	-0.160229	-0.0652929	-0.0207595	0.0860525	NA	NA	NA	NA	NA	NA	0.0754732	-0.0739617	-0.00151149
Q80X90	0.00412583	-0.00629714	0.00217131	0.199247	-0.156691	-0.0425555	0.0136271	0.0242584	-0.0378856	-0.0900975	0.137619	-0.0475219	0.0201386	-0.0581398	0.0380012
Q80X95	NA	NA	NA	NA	NA	NA	NA	NA	NA	0.0560837	0.0522227	-0.108306	NA	NA	NA
Q80XI3	-0.0322992	-0.104921	0.137221	-0.172813	-0.0171544	0.189967	NA	NA	NA	-0.166617	-0.0200433	0.186661	NA	NA	NA
Q80XU3	0.0145028	0.098034	-0.112537	0.0743095	-0.0676362	-0.00667332	0.00372316	0.0771443	-0.0808675	0.0456169	0.0715897	-0.117207	0.0247062	0.0221703	-0.0468765
Q80YV3	0.113464	0.0719447	-0.185409	NA	NA	NA	NA	NA	NA	NA	NA	NA	NA	NA	NA
Q80YW0	0.202696	0.0511266	-0.253822	-0.00881277	-0.0382934	0.0471061	0.17866	-0.0464027	-0.132257	NA	NA	NA	-0.00861145	0.027751	-0.0191395
Q80Z29	-0.0131579	-0.113341	0.126499	0.0606577	-0.0970573	0.0363996	NA	NA	NA	0.102759	-0.0479501	-0.0548092	0.0502949	0.0129995	-0.0632944
Q80ZG1	NA	NA	NA	NA	NA	NA	NA	NA	NA	0.260123	-0.159936	-0.100187	NA	NA	NA
Q810A7	NA	NA	NA	NA	NA	NA	NA	NA	NA	-0.109276	0.0111182	0.0981583	NA	NA	NA
Q810B6	0.125297	-0.027547	-0.0977503	-0.0136649	0.0587011	-0.0450362	0.0544732	0.0458455	-0.100319	-0.0193248	0.00176254	0.0175623	0.0315143	0.0559244	-0.0874387
Q810F1	NA	NA	NA	-0.0790197	0.153313	-0.0742936	NA	NA	NA	NA	NA	NA	NA	NA	NA
Q810F4	0.146344	0.037058	-0.183402	-0.411565	0.0771026	0.334463	NA	NA	NA	-0.0701155	-0.121856	0.191971	NA	NA	NA
Q811M1	-0.0168403	-0.000439415	0.0172797	NA	NA	NA	NA	NA	NA	NA	NA	NA	NA	NA	NA
Q811X6	0.186647	-0.141063	-0.0455847	-0.0253701	-0.110305	0.135675	NA	NA	NA	NA	NA	NA	0.0316744	-0.0891459	0.0574715
Q812D1	0.0476167	0.0323801	-0.0799968	0.143425	-0.172233	0.0288074	-0.0449659	0.0368513	0.00811459	-0.109994	-0.022332	0.132326	0.0358593	-0.154008	0.118148
Q8BFQ4	0.018959	-0.0226202	0.00366121	0.0952886	-0.0489234	-0.0463652	NA	NA	NA	NA	NA	NA	0.032367	-0.12355	0.0911834
Q8BFR4	NA	NA	NA	NA	NA	NA	NA	NA	NA	-0.0870239	0.0553432	0.0316807	-0.0517835	0.0428268	0.00895676
Q8BFY9	0.0395265	0.0210803	-0.0606068	-0.0014204	0.0142502	-0.0128298	NA	NA	NA	-0.10416	-0.0477217	0.151882	0.0123303	-0.0355956	0.0232652
Q8BFZ3	0.0616131	0.0436891	-0.105302	NA	NA	NA	0.101046	-0.259118	0.158072	NA	NA	NA	-0.143363	0.0229634	0.1204
Q8BG05	0.0160247	-0.0269771	0.0109524	-0.0123439	-0.0685225	0.0808664	-0.0171328	0.0242099	-0.00707711	-0.135504	0.00651786	0.128986	0.0616128	-0.0864968	0.0248839
Q8BG07	0.131079	-0.0730909	-0.0579876	0.574304	-0.454777	-0.119527	-0.280035	0.599406	-0.319372	-0.751824	0.513134	0.23869	NA	NA	NA
Q8BGD9	-0.00494968	-0.0159766	0.0209262	0.00223848	-0.0363386	0.0341001	-0.0268438	-0.0394577	0.0663015	0.056026	0.0328838	-0.0889097	NA	NA	NA
Q8BH43	0.110766	-0.0364046	-0.0743609	0.0956669	0.0742652	-0.169932	0.019974	0.0480903	-0.0680643	0.0829352	0.035174	-0.118109	0.0249867	-0.019617	-0.00536973
Q8BH59	0.0126983	0.0196724	-0.0323708	-0.0537817	0.160903	-0.107122	0.0152875	0.132068	-0.147356	-0.151242	0.106638	0.0446046	-0.0141007	-0.0706025	0.0847032
Q8BH61	-0.0401558	-0.0378445	0.0780003	-0.0173282	-0.106342	0.12367	-0.133917	0.0906535	0.0432639	-0.0151794	0.0516206	-0.0364412	-0.0120943	0.0238446	-0.0117502
Q8BH69	NA	NA	NA	-0.108021	0.104914	0.0031072	NA	NA	NA	NA	NA	NA	NA	NA	NA
Q8BH79	NA	NA	NA	-0.0203637	0.039531	-0.0191673	NA	NA	NA	NA	NA	NA	NA	NA	NA
Q8BHD7	-0.241081	0.527063	-0.285983	-0.0338607	-0.0155595	0.0494202	0.0645231	-0.144308	0.0797846	0.10385	-0.0665687	-0.0372809	NA	NA	NA
Q8BHG9	-0.015823	0.00186787	0.0139551	0.0516689	-0.0265089	-0.0251599	-0.0331177	-0.0461847	0.0793025	NA	NA	NA	-0.0104145	0.0399447	-0.0295302
Q8BHJ5	-0.0219618	-0.0694722	0.091434	-0.0207442	-0.0035401	0.0242843	-0.0827389	0.0252364	0.0575024	NA	NA	NA	NA	NA	NA
Q8BHN3	0.0334354	-0.0290084	-0.00442699	0.00656695	0.00111309	-0.00768004	0.0126867	-0.0187123	0.00602566	-0.0227822	-0.000525003	0.0233072	0.0357439	-0.0139091	-0.0218348
Q8BJS4	-0.00894068	-0.0200273	0.028968	-0.0632531	0.0116408	0.0516123	0.0108263	-0.0779478	0.0671215	0.0383214	-0.080579	0.0422575	-0.0561517	-0.00368948	0.0598412
Q8BJY1	0.0817559	-0.00656832	-0.0751875	0.112395	-0.0873209	-0.0250742	-0.0104288	0.00826306	0.00216576	0.0374191	0.0873085	-0.124728	0.0498773	-0.0307828	-0.0190946
Q8BK64	-0.106238	0.0487694	0.0574685	-0.103679	0.0116443	0.0920345	-0.143048	0.0443488	0.0986992	-0.191836	0.00275345	0.189083	-0.0618101	-0.0189744	0.0807845
Q8BK67	0.0600909	-0.0808614	0.0207705	-0.429559	0.102023	0.327536	-0.0257669	0.119268	-0.0935008	-0.206836	0.126095	0.080741	-0.0368227	-0.0153148	0.0521376
Q8BKC5	-0.020676	-0.00289857	0.0235746	-0.143801	0.0722035	0.0715978	-0.0880795	0.127034	-0.0389547	-0.0792043	0.0182462	0.0609582	-0.051466	0.0330499	0.0184162
Q8BL97	0.0434186	0.00887322	-0.0522918	0.0913389	-0.0582095	-0.0331294	0.00964471	0.0471049	-0.0567497	-0.0933815	-0.0153704	0.108752	-0.0333928	0.0249987	0.00839414
Q8BMA6	NA	NA	NA	NA	NA	NA	NA	NA	NA	-0.0960936	-0.101722	0.197816	NA	NA	NA
Q8BMD8	-0.0201596	-0.0174586	0.0376182	-0.00211316	0.040821	-0.0387078	0.0632701	-0.0536486	-0.00962148	0.0494955	0.00905124	-0.0585468	-0.00676308	0.0161118	-0.00934876
Q8BMG7	-0.0419958	0.0363987	0.00559711	NA	NA	NA	NA	NA	NA	-0.0948473	-0.0101933	0.105041	NA	NA	NA
Q8BMJ2	NA	NA	NA	-0.100386	0.0237423	0.0766434	NA	NA	NA	-0.116354	-0.0251969	0.141551	NA	NA	NA
Q8BMK4	-0.25604	0.135074	0.120966	-0.412768	0.134232	0.278536	-0.206249	-0.0881078	0.294357	-0.375305	-0.274245	0.64955	-0.278861	0.0250657	0.253795
Q8BP47	-0.0129312	-0.000405111	0.0133363	-0.0876251	0.019385	0.0682401	0.0762854	-0.134414	0.0581283	0.034073	-0.0697534	0.0356804	0.00524087	0.0386257	-0.0438665
Q8BP67	-0.108531	-0.0329011	0.141432	0.00616763	-0.189499	0.183332	-0.25101	0.0651378	0.185872	-0.287369	0.0570918	0.230277	-0.0650681	-0.0713616	0.13643
Q8BPB0	-0.023553	-0.0527586	0.0763115	-0.088508	-0.0171849	0.105693	-0.0673209	-0.00896362	0.0762845	-0.0738932	-0.0568967	0.13079	NA	NA	NA
Q8BPU7	0.0713404	-0.0402573	-0.0310831	0.0732011	-0.0599876	-0.0132135	0.0506402	0.00721904	-0.0578593	0.0269688	0.0292188	-0.0561876	0.034467	-0.0112969	-0.0231701
Q8BSU7	NA	NA	NA	NA	NA	NA	-0.00506725	0.1188	-0.113733	NA	NA	NA	0.0442942	0.00583968	-0.0501339
Q8BT60	-0.070969	0.029684	0.041285	-0.129495	0.0868531	0.0426415	0.0436746	-0.0392262	-0.00444838	0.0363555	-0.0438843	0.00752878	-0.0272946	-0.0218656	0.0491602
Q8BTI8	NA	NA	NA	NA	NA	NA	NA	NA	NA	-0.0848101	-0.0256688	0.110479	NA	NA	NA
Q8BTM8	-0.0486551	0.0463396	0.00231552	-0.0163285	0.0235606	-0.00723208	-0.0209128	-0.0159723	0.0372733	-0.00925717	0.0232736	-0.0141775	-0.0803368	0.0371658	0.043171
Q8BTZ7	NA	NA	NA	-0.0700667	0.00651383	0.0635528	NA	NA	NA	NA	NA	NA	NA	NA	NA
Q8BU14	NA	NA	NA	NA	NA	NA	NA	NA	NA	-0.00719868	0.0128486	-0.00564989	NA	NA	NA
Q8BU31	NA	NA	NA	NA	NA	NA	0.166864	0.0231486	-0.190012	NA	NA	NA	0.0869985	0.0163629	-0.103361
Q8BUK6	NA	NA	NA	0.00799669	-0.0211313	0.0131346	0.0210783	-0.0831865	0.0621082	-0.026025	0.0809289	-0.0549039	0.0390228	-0.000953812	-0.038069
Q8BVE3	0.103489	-0.0475732	-0.0559158	-0.00666646	-0.0327212	0.0393877	0.0769259	-0.0357935	-0.0411324	-0.00187761	0.0143523	-0.0124747	-0.0618382	-0.00249407	0.0643323
Q8BX70	NA	NA	NA	0.0989477	-0.058416	-0.0405317	-0.0457805	0.0866494	-0.0817377	-0.297508	0.31284	-0.015332	0.0490517	-0.120516	0.071464
Q8BX94	-0.0153496	0.0292908	-0.0139411	-0.0650033	0.0363633	0.0286399	NA	NA	NA	NA	NA	NA	NA	NA	NA
Q8BXV2	NA	NA	NA	NA	NA	NA	NA	NA	NA	-0.097778	0.131498	-0.0337196	NA	NA	NA
Q8BXZ1	0.111612	-0.0217372	-0.0898746	-0.0835177	0.0881964	-0.00467867	0.0807666	0.0381974	-0.118964	-0.000868642	0.0886348	-0.0877662	-0.1507	0.116577	0.0341235
Q8BYA0	0.212229	0.0206456	-0.232875	NA	NA	NA	NA	NA	NA	NA	NA	NA	0.154755	-0.190702	0.0359468
Q8BYI6	0.128817	0.0971324	-0.225949	NA	NA	NA	0.242105	0.0968746	-0.33898	0.322031	-0.046495	-0.275536	NA	NA	NA
Q8BYW1	0.107759	0.0655788	-0.173338	0.0901964	0.0146109	-0.104807	0.0893927	-0.00482021	-0.0845725	0.134839	-0.0354453	-0.0993934	0.173829	-0.0216493	-0.15218
Q8BZQ2	-0.118438	0.090402	0.0280359	-0.0304357	0.03998	-0.00954429	NA	NA	NA	0.328674	-0.0962898	-0.232385	NA	NA	NA
Q8BZW8	NA	NA	NA	NA	NA	NA	-0.000876121	-0.0230226	0.0238987	0.017066	-0.0116588	-0.0054072	NA	NA	NA
Q8C079	NA	NA	NA	-0.0163501	0.0671065	-0.0507564	NA	NA	NA	NA	NA	NA	NA	NA	NA
Q8C0E2	0.012455	-0.0372333	0.0247783	-0.119831	0.114798	0.00503251	0.00908755	0.0415477	-0.0506352	0.0712705	-0.0218068	-0.0494637	-0.019884	0.054706	-0.034822
Q8C0L0	0.087032	-0.0537241	-0.0333079	-0.108379	0.0648849	0.0434942	0.149388	-0.100117	-0.0492704	0.0554911	-0.0592443	0.00375316	-0.0404234	-0.00293837	0.0433617
Q8C147	0.0491994	0.0260582	-0.0752576	0.0268534	0.0201555	-0.0470089	0.0403597	0.108312	-0.148671	0.0616871	-0.0398492	-0.0235178	-0.0146315	0.0736281	-0.0589966
Q8C166	0.033307	-0.0225899	-0.0107171	-0.103626	-0.0332885	0.136914	-0.00688873	-0.0411729	0.0480616	0.0581558	-0.0207965	-0.0373593	-0.0982717	0.0326118	0.0656599
Q8C2E7	NA	NA	NA	NA	NA	NA	NA	NA	NA	-0.0298977	-0.00299491	0.0328926	0.0157764	0.0258739	-0.0416503
Q8C2K1	-0.0383411	-0.129008	0.167349	0.0520371	-0.0149056	-0.0371315	NA	NA	NA	-0.0307509	-0.0663365	0.0970874	0.0118073	0.00261361	-0.0144209
Q8C2K5	0.0333989	-0.0163807	-0.0170182	NA	NA	NA	-0.0133744	0.0803867	-0.0670123	NA	NA	NA	-0.0218724	0.0874641	-0.0655917
Q8C2Q3	0.0697283	-0.00689015	-0.0628382	0.152272	-0.0782578	-0.0740146	0.000961085	-0.00727672	0.00631564	-0.075781	0.0507768	0.0250042	0.0351111	0.0707399	-0.105851
Q8C3J5	0.0822146	0.00778596	-0.0900006	0.0110502	-0.0354766	0.0244264	0.0149054	0.0520776	-0.0669831	0.0125321	0.0239218	-0.0364539	-0.0150498	0.00711739	0.00793244
Q8C4Y3	NA	NA	NA	-0.206801	-0.135628	0.342429	NA	NA	NA	NA	NA	NA	NA	NA	NA
Q8C6G8	NA	NA	NA	NA	NA	NA	-0.143448	0.0649945	0.0784537	NA	NA	NA	0.000948304	-0.13514	0.134191
Q8C6U2	NA	NA	NA	0.0101974	-0.000938211	-0.00925915	-0.0152061	0.106532	-0.0913259	NA	NA	NA	-0.119258	0.0202523	0.0990061
Q8C7R4	0.290138	0.0403454	-0.330483	0.0679029	0.0718129	-0.139716	0.0254656	0.0790746	-0.10454	0.0262385	0.0445928	-0.0708313	0.176242	-0.0863333	-0.0899086
Q8C7X2	-0.00056102	0.137384	-0.136823	NA	NA	NA	NA	NA	NA	NA	NA	NA	-0.106265	0.0307222	0.0755423
Q8C863	NA	NA	NA	NA	NA	NA	NA	NA	NA	NA	NA	NA	-0.0503326	0.0479661	0.00236645
Q8CB87	-0.0145443	-0.00262371	0.017168	0.0362864	0.0317255	-0.0680119	0.0757581	-0.0247608	-0.0509974	0.0923561	0.0202099	-0.112566	0.0760959	0.0560225	-0.132118
Q8CC88	NA	NA	NA	NA	NA	NA	NA	NA	NA	-0.00355167	0.0442622	-0.0407106	NA	NA	NA
Q8CCF0	NA	NA	NA	0.118739	-0.123481	0.00474182	NA	NA	NA	-0.110999	-0.0268688	0.137868	NA	NA	NA
Q8CCH2	NA	NA	NA	-0.00537861	-0.0197337	0.0251123	NA	NA	NA	-0.119662	-0.00148765	0.121149	NA	NA	NA
Q8CCS6	NA	NA	NA	0.139786	-0.118187	-0.0215992	0.0250826	0.152224	-0.177306	-0.100235	0.0713214	0.0289135	0.027713	0.0234513	-0.0511642
Q8CDM8	0.0198682	0.0557055	-0.0755736	-0.100943	0.0782635	0.0226793	0.0528354	0.000770189	-0.0536056	0.132159	-0.0527639	-0.0793947	0.0126414	0.0047821	-0.0174235
Q8CDN6	NA	NA	NA	0.0753136	-0.0618799	-0.0134337	NA	NA	NA	NA	NA	NA	NA	NA	NA
Q8CFI7	NA	NA	NA	NA	NA	NA	NA	NA	NA	-0.140305	0.00652468	0.133781	NA	NA	NA
Q8CFQ3	0.1011	0.0184972	-0.119597	0.00709776	-0.0841482	0.0770505	NA	NA	NA	NA	NA	NA	-0.0580665	-0.00580342	0.06387
Q8CGC7	-0.00322366	0.00602315	-0.00279949	0.0419011	-0.0439558	0.00205471	-0.0510219	0.00840353	0.0426184	-0.0353931	-0.0154535	0.0508465	0.0908564	-0.0223445	-0.068512
Q8CGK3	NA	NA	NA	NA	NA	NA	NA	NA	NA	-0.169265	-0.0504912	0.219756	NA	NA	NA
Q8CGP0	NA	NA	NA	0.145944	0.1571	-0.303043	NA	NA	NA	NA	NA	NA	NA	NA	NA
Q8CGP6	-0.0199974	-0.0455059	0.0655034	NA	NA	NA	NA	NA	NA	NA	NA	NA	NA	NA	NA
Q8CGS4	-0.0559796	0.0761668	-0.0201872	NA	NA	NA	NA	NA	NA	-0.0200983	0.0119438	0.00815444	-0.0492264	0.0288021	0.0204243
Q8CGU6	NA	NA	NA	0.034353	0.00799755	-0.0423505	-0.0460464	0.0689006	-0.0228543	-0.00198215	0.102449	-0.100467	0.00047086	0.00441834	-0.0048892
Q8CH18	NA	NA	NA	0.122411	-0.0750937	-0.047317	NA	NA	NA	NA	NA	NA	0.0363838	-0.00132785	-0.035056
Q8CHN6	NA	NA	NA	NA	NA	NA	NA	NA	NA	-0.167417	0.121153	0.0462645	0.0455029	-0.168992	0.123489
Q8CHP8	0.0258435	0.0181274	-0.0439709	0.0716003	0.0593555	-0.130956	-0.0561777	0.105563	-0.049385	0.186116	-0.0553486	-0.130767	0.0392489	-0.0238081	-0.0154407
Q8CHT0	NA	NA	NA	0.113883	-0.169858	0.0559749	NA	NA	NA	-0.0665589	0.099262	-0.0327031	NA	NA	NA
Q8CI33	-0.000244432	-0.0533949	0.0536393	NA	NA	NA	NA	NA	NA	NA	NA	NA	NA	NA	NA
Q8CI94	0.0817406	-0.0463221	-0.0354185	NA	NA	NA	NA	NA	NA	NA	NA	NA	0.051878	-0.0212505	-0.0306275
Q8CI95	NA	NA	NA	NA	NA	NA	NA	NA	NA	-0.164701	0.119908	0.0447933	NA	NA	NA
Q8CIE6	-0.000453357	0.00383434	-0.00338098	-0.0259475	-0.0163984	0.042346	-0.00680223	-0.0168737	0.023676	-0.0332412	-0.00480745	0.0380486	-0.0307097	0.00574509	0.0249646
Q8CIM5	NA	NA	NA	0.0880886	0.108528	-0.196616	NA	NA	NA	NA	NA	NA	NA	NA	NA
Q8CIN7	-0.0726389	-0.161495	0.234134	0.0913537	-0.22068	0.129327	0.327508	-0.302385	-0.0251232	0.107507	-0.130917	0.02341	0.0020839	0.188737	-0.190821
Q8CIZ8	NA	NA	NA	-0.284206	0.475359	-0.191153	NA	NA	NA	NA	NA	NA	NA	NA	NA
Q8CJG0	NA	NA	NA	-0.00232466	-0.0422794	0.044604	NA	NA	NA	NA	NA	NA	NA	NA	NA
Q8JZN5	NA	NA	NA	-0.00221061	0.126237	-0.124026	NA	NA	NA	0.0315591	0.0402764	-0.0718355	-0.0318098	0.114207	-0.082397
Q8JZQ2	NA	NA	NA	NA	NA	NA	NA	NA	NA	NA	NA	NA	-0.137886	0.0425415	0.0953441
Q8K003	0.0806432	-0.0587726	-0.0218707	0.0735012	-0.17426	0.100759	NA	NA	NA	NA	NA	NA	0.0525265	0.0509951	-0.103522
Q8K019	NA	NA	NA	-0.434008	-0.00088689	0.434895	NA	NA	NA	NA	NA	NA	NA	NA	NA
Q8K124	0.149893	0.0407025	-0.190595	0.1506	0.0371078	-0.187708	0.0962468	-0.0440125	-0.0522343	NA	NA	NA	0.0354067	-0.0431448	0.00773805
Q8K1B8	-0.00203844	0.0392899	-0.0372514	-0.028256	-0.00764464	0.0359007	-0.0333737	0.0343178	-0.000944016	0.0165754	0.0317398	-0.0483152	-0.0181158	0.0111831	0.00693263
Q8K1K6	-0.0179437	0.00165258	0.0162911	-0.0922426	0.035659	0.0565835	-0.0386384	-0.0738804	0.112519	NA	NA	NA	-0.107631	0.0373319	0.0702989
Q8K1M6	-0.00560797	0.0203162	-0.0147082	-0.186083	0.152172	0.033911	0.0410419	-0.0639701	0.0229281	0.00844889	-0.0334744	0.0250255	-0.0239604	0.0531044	-0.029144
Q8K1R7	0.03812	-0.0330787	-0.00504125	0.0818761	-0.105247	0.0233712	0.0801985	0.00479376	-0.0849923	0.0428933	0.0455014	-0.0883948	-0.0452595	-0.0279886	0.0732482
Q8K297	NA	NA	NA	0.122525	-0.123252	0.000727679	NA	NA	NA	-0.167826	0.113373	0.0544528	NA	NA	NA
Q8K2F0	NA	NA	NA	0.0353262	-0.0201671	-0.015159	NA	NA	NA	NA	NA	NA	NA	NA	NA
Q8K2F8	NA	NA	NA	0.0585301	-0.019392	-0.0391382	-0.270281	0.421692	-0.151411	NA	NA	NA	0.0809186	-0.0557882	-0.0251304
Q8K2H4	0.106391	-0.0218601	-0.0845308	-0.0213859	0.127792	-0.106406	0.056732	-0.0811854	0.0244534	0.196995	-0.0517975	-0.145198	0.0010062	0.00224068	-0.00324687
Q8K2L8	-0.00236302	-0.0557313	0.0580943	NA	NA	NA	NA	NA	NA	NA	NA	NA	NA	NA	NA
Q8K2V1	NA	NA	NA	NA	NA	NA	NA	NA	NA	0.501954	-0.169435	-0.332519	NA	NA	NA
Q8K2Z4	NA	NA	NA	-0.0468359	-0.0429116	0.0897475	NA	NA	NA	NA	NA	NA	NA	NA	NA
Q8K310	0.048848	0.0224072	-0.0712552	0.0232037	-0.0376136	0.0144099	NA	NA	NA	-0.0806561	0.000384301	0.0802718	-0.0151935	-0.0930459	0.108239
Q8K352	-0.0187281	0.0425891	-0.0238611	-0.00441965	0.0667059	-0.0622863	-0.0143506	0.00640422	0.00794642	0.0856926	0.0901265	-0.175819	0.0339217	0.0332422	-0.0671638
Q8K3H0	NA	NA	NA	NA	NA	NA	NA	NA	NA	0.0338112	-0.0764501	0.0426388	NA	NA	NA
Q8K3K4	0.0232091	0.016206	-0.0394151	-0.108051	0.0124316	0.0956198	-0.0385885	0.0133629	0.0252256	-0.00944266	0.0328751	-0.0234325	-0.0845682	0.0604656	0.0241026
Q8K3Y6	-0.00159046	0.226243	-0.224653	NA	NA	NA	0.0222579	-0.00692594	-0.015332	-0.0124449	-0.0837578	0.0962027	NA	NA	NA
Q8K400	NA	NA	NA	0.0261249	0.0670719	-0.0931968	NA	NA	NA	NA	NA	NA	0.0899563	-0.0388895	-0.0510668
Q8K4F7	NA	NA	NA	0.087595	-0.208805	0.12121	0.0607682	-0.0910114	0.0302432	-0.0288216	0.0755863	-0.0467648	NA	NA	NA
Q8K4I3	NA	NA	NA	NA	NA	NA	NA	NA	NA	NA	NA	NA	0.0250929	-0.0648231	0.0397302
Q8K4L3	0.0978881	-0.0452189	-0.0526692	0.0075334	0.0976331	-0.105167	0.02232	0.00938306	-0.031703	0.0716814	-0.0419708	-0.0297105	-0.0404272	0.0332926	0.00713456
Q8K4Z5	0.00548832	0.0159656	-0.0214539	-0.00603288	0.0107553	-0.00472246	-0.0548876	0.0820678	-0.0271802	-0.113633	0.0103782	0.103255	0.0436283	-0.0522091	0.00858074
Q8K585	0.19067	-0.0625424	-0.128128	0.172916	0.0155125	-0.188429	-0.0149369	0.0792667	-0.0643298	-0.155953	0.0774638	0.0784887	0.0664777	-0.0331389	-0.0333388
Q8QZY1	-0.0562013	0.0230087	0.0331927	-0.123162	-0.00166702	0.124829	-0.0544676	0.00995347	0.0445141	-0.1858	0.0206816	0.165118	-0.0105316	-0.0434481	0.0539797
Q8QZY6	0.123043	-0.0755464	-0.0474971	NA	NA	NA	NA	NA	NA	0.121697	-0.0230997	-0.098597	-0.07625	0.0981067	-0.0218567
Q8QZY9	0.0819708	-0.0275329	-0.0544379	0.0842641	-0.096495	0.0122308	NA	NA	NA	0.0848524	-0.0714666	-0.0133858	NA	NA	NA
Q8R050	0.086643	-0.112196	0.0255533	NA	NA	NA	NA	NA	NA	-0.0287554	0.0116775	0.017078	NA	NA	NA
Q8R081	0.0110053	-0.0292613	0.0182559	0.0851609	-0.0872555	0.00209454	-0.0696529	0.0492137	0.0204391	-0.114793	0.0290071	0.0857856	0.0126451	-0.0384791	0.0258341
Q8R0A7	-0.120356	-0.0193852	0.139741	-0.139763	-0.0388139	0.178577	-0.0335111	-0.00876766	0.0422788	-0.0178546	-0.085895	0.10375	-0.0208474	-0.0582808	0.0791282
Q8R0T6	-0.0300282	-0.0610866	0.0911148	-0.0255529	0.0108067	0.0147462	0.0449919	-0.104651	0.0596586	0.140205	-0.0714911	-0.0687141	NA	NA	NA
Q8R1Q8	NA	NA	NA	NA	NA	NA	0.16798	-0.00941684	-0.158563	NA	NA	NA	0.163514	-0.199756	0.0362411
Q8R1X6	NA	NA	NA	0.0104844	-0.132369	0.121885	0.067643	-0.109272	0.0416293	NA	NA	NA	NA	NA	NA
Q8R2U6	NA	NA	NA	0.133891	-0.0576936	-0.0761977	NA	NA	NA	0.241931	0.0185239	-0.260455	0.107464	0.0450824	-0.152546
Q8R317	0.073226	0.174032	-0.247258	0.0829227	-0.0521378	-0.0307848	NA	NA	NA	NA	NA	NA	NA	NA	NA
Q8R3D1	NA	NA	NA	-0.106737	-0.16395	0.270687	NA	NA	NA	NA	NA	NA	NA	NA	NA
Q8R3E3	NA	NA	NA	NA	NA	NA	NA	NA	NA	0.14334	-0.0692295	-0.0741107	NA	NA	NA
Q8R431	0.116169	0.00284994	-0.119019	NA	NA	NA	0.11464	0.0395833	-0.154224	0.121324	-0.0280695	-0.0932541	-0.112137	0.00644903	0.105688
Q8R4A1	0.0019779	0.057436	-0.0594139	-0.0423867	-0.0677311	0.110118	0.0466964	0.0334555	-0.0801519	0.0111461	0.014844	-0.0259901	-0.0511864	0.0309557	0.0202307
Q8R511	-0.00078648	0.0269267	-0.0261402	0.0183156	0.00719089	-0.0255065	0.0165992	-0.0540393	0.0374401	0.0953432	-0.0654933	-0.02985	0.0487378	-0.0141577	-0.0345801
Q8R5A3	0.00731163	0.0637776	-0.0710892	0.0707248	0.00343769	-0.0741624	0.0664565	0.0440643	-0.110521	0.0670359	-0.0188757	-0.0481602	0.0118352	0.0655612	-0.0773964
Q8R5G7	0.108776	-0.035221	-0.0735549	0.0139795	0.0283141	-0.0422936	0.0773548	-0.00135346	-0.0760014	0.129859	0.0485297	-0.178389	0.0475359	0.0410633	-0.0885992
Q8VBT6	0.181991	0.00907084	-0.191062	NA	NA	NA	0.106092	0.0282099	-0.134302	0.0950461	-0.038385	-0.056661	0.152495	-0.0389579	-0.113537
Q8VC88	0.00300357	0.135456	-0.13846	-0.109783	0.13464	-0.0248565	0.0428325	-0.0760695	0.033237	0.165416	-0.0477752	-0.11764	0.0447011	0.0885566	-0.133258
Q8VD04	0.0998874	-0.0123248	-0.0875625	NA	NA	NA	NA	NA	NA	NA	NA	NA	NA	NA	NA
Q8VD48	NA	NA	NA	0.141982	-0.0516037	-0.0903784	NA	NA	NA	NA	NA	NA	NA	NA	NA
Q8VD58	0.01217	0.0429727	-0.0551427	NA	NA	NA	NA	NA	NA	0.117568	0.115248	-0.232816	0.00665905	0.0593296	-0.0659887
Q8VDD5	0.0248328	0.0356171	-0.06045	0.0235804	-0.0381237	0.0145433	0.0834275	-0.0147083	-0.0687193	0.114539	-0.0391227	-0.0754163	0.01928	-0.0435314	0.0242514
Q8VDJ3	0.057203	-0.0309423	-0.0262607	NA	NA	NA	NA	NA	NA	NA	NA	NA	NA	NA	NA
Q8VDM6	0.0542342	-0.0482518	-0.00598237	0.109113	-0.0342222	-0.0748912	0.0307427	-0.129265	0.0985223	0.0456831	-0.0409837	-0.00469935	0.0111002	0.011302	-0.0224023
Q8VDP4	0.00335826	0.00152204	-0.00488031	-0.00791451	-0.0717395	0.079654	-0.00833778	-0.00349204	0.0118298	-0.0637781	-0.0149439	0.0787219	0.0101649	-0.0630958	0.0529308
Q8VE37	NA	NA	NA	NA	NA	NA	-0.0321587	-0.0506353	0.082794	0.0521798	-0.219794	0.167614	NA	NA	NA
Q8VE97	-0.0380063	-0.0238657	0.061872	0.00626882	-0.0815582	0.0752894	-0.076566	0.0447912	0.0317748	-0.132711	0.022595	0.110116	-0.0363426	0.00147403	0.0348686
Q8VED5	NA	NA	NA	NA	NA	NA	NA	NA	NA	-0.044189	-0.0516304	0.0958195	-0.143463	-0.0893691	0.232832
Q8VEE0	0.1007	0.00587989	-0.10658	NA	NA	NA	0.251429	-0.00194055	-0.249489	NA	NA	NA	NA	NA	NA
Q8VEE4	-0.213841	-0.161668	0.375509	-0.030047	-0.204011	0.234058	-0.041061	0.00401403	0.0370469	-0.198376	0.0849189	0.113457	0.025708	-0.132479	0.106771
Q8VEH3	NA	NA	NA	-0.101792	-0.0257596	0.127552	NA	NA	NA	NA	NA	NA	0.0505775	-0.053767	0.00318942
Q8VEK3	-0.00899648	-0.0160457	0.0250422	0.0916977	-0.105324	0.0136267	-0.0640269	0.0581795	0.00584743	-0.119946	0.0305981	0.0893484	-0.0447431	-0.0370699	0.0818131
Q8VEM8	NA	NA	NA	NA	NA	NA	NA	NA	NA	NA	NA	NA	0.0325487	0.00584399	-0.0383927
Q8VH51	-0.202954	0.0572564	0.145698	0.036747	-0.0734779	0.0367309	-0.0835403	0.0641536	0.0193866	-0.0474112	0.0170506	0.0303606	-7.77e-05	0.0171145	-0.0170367
Q8VHF5	-0.0115954	0.118048	-0.106452	0.0546007	0.0822594	-0.13686	0.0466206	-0.00149167	-0.0451289	-0.108533	0.0829742	0.0255584	0.026329	0.0254743	-0.0518034
Q8VHT6	NA	NA	NA	NA	NA	NA	NA	NA	NA	0.0220877	0.0523149	-0.0744026	NA	NA	NA
Q8VI04	0.0115062	-0.100492	0.0889863	-0.0550863	0.0460699	0.00901635	0.00366758	0.0452104	-0.048878	0.0346071	0.0371221	-0.0717292	-0.0459283	0.0470328	-0.00110442
Q8VI63	NA	NA	NA	0.0814676	0.0125483	-0.0940159	NA	NA	NA	-0.0827696	0.0106511	0.0721185	NA	NA	NA
Q8VIJ6	0.0269505	-0.0112973	-0.0156532	0.162412	-0.135357	-0.0270558	-0.00382574	0.0157941	-0.0119684	-0.106563	0.0407703	0.0657922	0.000715818	-0.0542752	0.0535593
Q91V33	NA	NA	NA	0.06885	-0.117035	0.048185	NA	NA	NA	NA	NA	NA	-0.000158584	-0.0392018	0.0393604
Q91V64	NA	NA	NA	NA	NA	NA	NA	NA	NA	-0.156891	0.269176	-0.112286	NA	NA	NA
Q91V92	0.0409967	-0.0593405	0.0183438	0.160515	-0.124216	-0.0362984	0.00980886	-0.000981339	-0.00882752	-0.00462669	-0.0525718	0.0571985	0.15714	-0.0312947	-0.125846
Q91VJ4	0.0337605	0.0364222	-0.0701827	0.070015	-0.000489193	-0.0695258	0.094698	-0.0837088	-0.0109892	0.130509	-0.289052	0.158543	0.00624196	0.0595967	-0.0658387
Q91VK1	0.0634665	0.0398385	-0.103305	NA	NA	NA	-0.157601	0.273202	-0.115602	NA	NA	NA	NA	NA	NA
Q91VR8	NA	NA	NA	NA	NA	NA	0.0360068	0.019902	-0.0559088	NA	NA	NA	0.019729	-0.0650508	0.0453218
Q91VW3	-0.0673781	0.0598873	0.00749077	-0.0306048	0.0669534	-0.0363486	-0.0360961	-0.0549298	0.0910258	-0.00298062	-0.0477407	0.0507213	0.0104089	-0.00670081	-0.00370808
Q91W89	NA	NA	NA	NA	NA	NA	NA	NA	NA	0.0617154	0.0294348	-0.0911502	NA	NA	NA
Q91WN1	-0.0408578	0.0199687	0.0208891	-0.0656131	-0.0311456	0.0967587	0.0314086	0.00508211	-0.0364907	NA	NA	NA	0.022566	-0.0660165	0.0434505
Q91XC8	NA	NA	NA	NA	NA	NA	NA	NA	NA	-0.139859	-0.0113128	0.151172	NA	NA	NA
Q91XS8	0.188905	-0.00348134	-0.185424	-0.0428935	0.019806	0.0230875	NA	NA	NA	0.156114	-0.0744206	-0.0816936	0.118291	-0.0648736	-0.053417
Q91Y78	0.0667584	0.0290123	-0.0957707	0.0109499	0.0813776	-0.0923275	0.101949	-0.0785718	-0.0233768	-0.032528	0.0652839	-0.0327559	-0.102348	0.109743	-0.00739426
Q91Y81	NA	NA	NA	0.145353	-0.086056	-0.0592966	NA	NA	NA	NA	NA	NA	NA	NA	NA
Q91YE6	NA	NA	NA	0.0260921	-0.0436211	0.0175289	NA	NA	NA	NA	NA	NA	NA	NA	NA
Q91YH5	-0.0952175	0.0899942	0.00522325	NA	NA	NA	NA	NA	NA	NA	NA	NA	NA	NA	NA
Q91YP3	0.0885009	-0.104145	0.0156444	-0.062763	-0.00917927	0.0719423	-0.0218692	0.101549	-0.0796796	0.232451	-0.134912	-0.0975393	-0.126148	-0.0425691	0.168717
Q91YR5	-0.0185948	0.0310927	-0.0124979	-0.231347	0.118849	0.112498	NA	NA	NA	0.024982	-0.0551838	0.0302019	-0.0985786	0.0646086	0.03397
Q91YT8	NA	NA	NA	NA	NA	NA	NA	NA	NA	-0.000876463	-0.0414296	0.0423061	0.00604503	-0.0180129	0.0119679
Q91YX5	0.0115634	0.113084	-0.124648	0.0173596	0.0530351	-0.0703948	0.126608	-0.0596037	-0.0670043	NA	NA	NA	NA	NA	NA
Q91ZJ5	0.0306683	-0.0679188	0.0372505	0.0653642	0.00589351	-0.0712577	0.084863	-0.034725	-0.050138	0.0871101	0.0846045	-0.171715	0.00655653	-0.0378545	0.0312979
Q91ZN1	0.0680917	-0.0559998	-0.0120918	0.0491115	0.0113161	-0.0604276	-0.0385262	0.088837	-0.0503108	0.0522749	0.0180764	-0.0703513	0.0409156	-0.0221901	-0.0187255
Q91ZR1	NA	NA	NA	-0.0249676	0.00846961	0.016498	0.0766924	-0.0468054	-0.029887	0.067574	-0.0169985	-0.0505755	0.0732766	-0.106251	0.0329742
Q91ZW3	0.0183668	0.00368437	-0.0220512	-0.0634767	0.043409	0.0200677	NA	NA	NA	-0.135004	0.0745272	0.0604765	-0.0761022	0.0107827	0.0653195
Q920A6	0.00943177	0.0144079	-0.0238397	0.094206	-0.0817135	-0.0124925	-0.066193	0.120048	-0.0538551	-0.0263416	0.200954	-0.174613	0.0526991	0.0691176	-0.121817
Q920B9	0.0263828	0.0742999	-0.100683	0.0359246	-0.091544	0.0556194	-0.0561365	0.131435	-0.075298	-0.215455	0.0448017	0.170653	-0.0383198	0.0247435	0.0135763
Q920D2	-0.127949	-0.0299015	0.157851	-0.186631	0.120499	0.0661314	NA	NA	NA	NA	NA	NA	NA	NA	NA
Q920G0	-0.0342419	0.0715019	-0.03726	-0.0967179	0.0964239	0.000294082	-0.0127718	0.0144657	-0.00169393	0.103534	-0.000965862	-0.102568	-0.111104	0.0415163	0.0695879
Q920J4	0.0878333	0.0362273	-0.124061	NA	NA	NA	0.0202603	0.022915	-0.0431752	-0.0120798	0.0704101	-0.0583302	0.0645584	-0.0355385	-0.0290199
Q920L2	0.00184942	-0.0281769	0.0263274	0.00750919	0.022774	-0.0302832	-0.175312	0.245758	-0.0704462	-0.227632	0.142597	0.0850351	0.0376874	0.0108786	-0.048566
Q920P0	NA	NA	NA	NA	NA	NA	NA	NA	NA	0.0425276	0.0605525	-0.10308	-0.0314709	-0.0289079	0.0603788
Q920P6	0.0560555	-0.00260818	-0.0534474	0.104769	-0.162112	0.0573428	0.0874735	-0.0190269	-0.0684467	0.0314772	0.0383618	-0.069839	0.0124585	-0.0315264	0.0190679
Q920Q0	0.130066	-0.137697	0.00763133	-0.00846139	-0.041438	0.0498994	0.0972276	-0.0127501	-0.0844775	0.0730779	0.0492397	-0.122318	0.00779681	0.0131096	-0.0209064
Q921F2	0.0696546	-0.0913152	0.0216606	0.0721342	-0.0179041	-0.0542301	-0.0456765	0.0913449	-0.0456684	-0.148653	0.114925	0.0337276	-0.0669197	0.0275784	0.0393413
Q921F4	NA	NA	NA	0.00396092	-0.103658	0.0996967	NA	NA	NA	NA	NA	NA	0.0182071	0.0140048	-0.0322119
Q921G6	NA	NA	NA	0.0407641	-0.0317557	-0.00900842	NA	NA	NA	NA	NA	NA	0.127403	-0.0261869	-0.101216
Q921G8	NA	NA	NA	-0.103544	0.0955892	0.00795496	NA	NA	NA	NA	NA	NA	NA	NA	NA
Q921L3	0.0751226	0.0538297	-0.128952	0.212953	-0.0806743	-0.132279	0.085541	0.060481	-0.146022	NA	NA	NA	NA	NA	NA
Q921M3	-0.00647583	0.025928	-0.0194522	-0.00970321	0.015441	-0.00573783	-0.021599	0.11048	-0.0888806	-0.113031	0.0571446	0.0558864	-0.0312965	-0.0258128	0.0571093
Q921M7	0.0783086	0.00721807	-0.0855267	-0.0272374	0.0288552	-0.00161778	-0.00072956	0.0485154	-0.0477858	0.0872285	-0.012989	-0.0742395	-0.00329437	-0.00626837	0.00956274
Q921W0	-0.00998402	0.108296	-0.0983119	NA	NA	NA	NA	NA	NA	NA	NA	NA	0.0969358	-0.0968646	-7.12e-05
Q921Z5	0.0886745	0.0125857	-0.10126	-0.103009	0.0795655	0.0234436	0.111302	0.0310214	-0.142324	-0.0775492	-0.00647182	0.0818637	-0.0373013	-0.0550875	0.0923889
Q922D4	-0.0167872	0.00868357	0.00810359	-0.1729	0.0558813	0.117019	NA	NA	NA	-0.121942	0.170569	-0.0486265	0.0239397	0.0077554	-0.0316951
Q922F4	NA	NA	NA	NA	NA	NA	0.143788	-0.219356	0.0755679	NA	NA	NA	NA	NA	NA
Q922H2	0.195132	0.0660046	-0.261136	NA	NA	NA	NA	NA	NA	0.0777563	0.111045	-0.188802	NA	NA	NA
Q922J9	-0.315242	0.12371	0.191532	-0.222719	0.0101954	0.212524	NA	NA	NA	NA	NA	NA	NA	NA	NA
Q922P9	0.0223093	-0.0548365	0.0325272	0.0555687	0.0099668	-0.0655355	0.0764457	-0.0606093	-0.0158364	-0.0190844	-0.00748291	0.0265673	-0.0687707	-0.0301261	0.0988968
Q923D2	NA	NA	NA	NA	NA	NA	0.061638	0.0341373	-0.0957753	NA	NA	NA	NA	NA	NA
Q923M1	0.170727	-0.124792	-0.0459345	0.0200929	-0.0248034	0.00471049	0.115275	-0.0980053	-0.0172693	-0.00796425	0.103605	-0.0956408	-0.0143662	0.145275	-0.130909
Q924A5	0.205488	0.00936422	-0.214853	-0.0374136	0.0549846	-0.0175709	0.0452447	-0.0902393	0.0449946	NA	NA	NA	-0.0783919	0.207909	-0.129517
Q924S5	-0.0111393	0.163066	-0.151927	0.0073802	0.0436742	-0.0510544	0.00665014	0.0251036	-0.0317537	NA	NA	NA	0.0739852	-0.128531	0.054546
Q925G1	NA	NA	NA	NA	NA	NA	0.0894846	-0.14222	0.0527351	NA	NA	NA	NA	NA	NA
Q925Q9	0.0541645	-0.0746319	0.0204674	0.113555	-0.0504782	-0.0630764	0.0955379	0.0200757	-0.115614	0.0869193	0.07083	-0.157749	0.0476131	-0.00933192	-0.0382812
Q99020	0.0688047	-0.0756671	0.0068624	0.0335617	-0.11795	0.0843885	-0.0842871	0.0836755	0.0006116	-0.161063	-0.0150935	0.176156	-0.0202389	-0.0130087	0.0332477
Q99J45	NA	NA	NA	0.0416305	0.016147	-0.0577775	NA	NA	NA	0.145976	-0.0537531	-0.0922226	0.00870669	-0.146414	0.137707
Q99J56	0.125444	0.00868145	-0.134125	NA	NA	NA	0.138424	-0.000690431	-0.137734	-0.124617	0.0729734	0.0516433	NA	NA	NA
Q99JI4	0.0367442	-0.0178345	-0.0189097	-0.0921007	0.0827426	0.0093581	-0.0491191	0.104952	-0.0558332	0.022507	-0.00892164	-0.0135854	-0.0429381	0.0663249	-0.0233867
Q99JR1	NA	NA	NA	NA	NA	NA	NA	NA	NA	NA	NA	NA	-0.000463029	0.0474063	-0.0469433
Q99JT2	0.0619293	0.030379	-0.0923083	0.123929	-0.0483313	-0.0755975	-0.00144062	0.0412211	-0.0397804	-0.00252939	-0.0268506	0.02938	NA	NA	NA
Q99JW4	NA	NA	NA	NA	NA	NA	NA	NA	NA	0.000297871	0.0578157	-0.0581135	NA	NA	NA
Q99JX3	-0.00642706	-0.019715	0.0261421	0.173095	-0.0567681	-0.116327	NA	NA	NA	-0.0176449	0.141591	-0.123946	NA	NA	NA
Q99JX4	-0.0442069	0.00755268	0.0366542	0.0060276	-0.0469393	0.0409117	NA	NA	NA	NA	NA	NA	NA	NA	NA
Q99JY0	-0.0633173	0.147797	-0.0844798	NA	NA	NA	-0.161297	0.10441	0.0568868	NA	NA	NA	NA	NA	NA
Q99JY9	0.0524374	-0.0155115	-0.0369259	-0.00437895	0.0122839	-0.00790497	0.0567978	-0.00899386	-0.047804	0.0556625	0.00689736	-0.0625598	0.00857262	0.0587274	-0.0673
Q99K48	NA	NA	NA	0.103806	-0.0942972	-0.00950922	NA	NA	NA	NA	NA	NA	NA	NA	NA
Q99KE1	0.10469	-0.0345342	-0.0701562	0.147625	-0.0506641	-0.0969611	0.245802	0.0302619	-0.276064	0.0579507	-0.0287416	-0.0292092	0.00538206	0.0184535	-0.0238355
Q99KI0	-0.0210493	0.0212924	-0.000243128	0.0787121	0.0118361	-0.0905482	-0.0680036	0.0770616	-0.00905796	NA	NA	NA	NA	NA	NA
Q99KN9	-0.0248962	-0.0358049	0.0607011	-0.0857473	-0.0253488	0.111096	-0.00230834	-0.0819937	0.084302	-0.00150752	-0.0886124	0.0901199	-0.0540723	0.0558866	-0.00181427
Q99KP6	-0.0192309	4.93e-05	0.0191816	0.0937071	-0.0562421	-0.037465	-0.072028	0.0880475	-0.0160195	-0.131681	0.0864763	0.0452049	-0.0402676	-0.00774293	0.0480106
Q99L45	-0.0473134	0.0237144	0.0235991	0.0815118	0.0277015	-0.109213	0.0408741	-0.144548	0.103674	-0.133655	-0.0628838	0.196539	-0.0200494	-0.00662246	0.0266719
Q99L47	NA	NA	NA	NA	NA	NA	-0.116665	0.0171196	0.0995451	NA	NA	NA	NA	NA	NA
Q99LF4	-0.0534787	-0.0167691	0.0702477	-0.0202358	0.0172521	0.00298374	-0.0171705	0.0498224	-0.0326519	-0.13389	-0.0150478	0.148938	0.0025458	0.0736471	-0.0761929
Q99LG2	NA	NA	NA	NA	NA	NA	NA	NA	NA	NA	NA	NA	0.0675431	-0.165181	0.0976374
Q99LL3	0.136844	-0.06278	-0.0740641	-0.204587	0.0749081	0.129679	0.101932	0.0168998	-0.118831	0.119976	-0.0597896	-0.0601859	0.0626081	-0.00459726	-0.0580108
Q99LU0	NA	NA	NA	0.0106153	-0.0132602	0.00264492	-0.00449329	0.063694	-0.0592007	-0.0940433	0.132033	-0.0379898	-0.00142915	-0.0336542	0.0350834
Q99M15	NA	NA	NA	0.0810464	-0.014028	-0.0670184	NA	NA	NA	0.221026	0.0707627	-0.291789	NA	NA	NA
Q99M51	NA	NA	NA	NA	NA	NA	NA	NA	NA	NA	NA	NA	-0.0236701	-0.0285764	0.0522465
Q99M64	0.124592	0.0624009	-0.186993	-0.101528	-0.00631067	0.107839	NA	NA	NA	NA	NA	NA	0.168116	-0.0670172	-0.101099
Q99MD9	NA	NA	NA	NA	NA	NA	-0.139356	0.108839	0.0305171	-0.346621	0.0833713	0.26325	-0.130016	-0.0217109	0.151727
Q99ML5	0.054732	0.00303047	-0.0577624	0.0114206	-0.0602627	0.0488421	0.0928214	0.0850391	-0.17786	NA	NA	NA	-0.0679739	-0.0413707	0.109345
Q99MN1	0.131768	-0.113283	-0.0184855	-0.113932	-0.0192284	0.133161	NA	NA	NA	-0.10795	-0.0186085	0.126558	-0.0248166	0.0315767	-0.00676005
Q99MR6	0.0246985	0.0188934	-0.0435919	0.0190247	-0.0319201	0.0128954	-0.0564143	0.0729264	-0.0165121	-0.0674103	0.0578474	0.00956288	-0.00664462	-0.0185129	0.0251575
Q99MS7	NA	NA	NA	NA	NA	NA	NA	NA	NA	0.0149762	-0.0609876	0.0460113	NA	NA	NA
Q99MZ8	0.0704605	-0.0289128	-0.0415477	-0.0221925	0.0382131	-0.0160206	-0.0199192	-0.0351839	0.0551031	0.105164	-0.0353612	-0.0698032	0.070831	-0.0423273	-0.0285037
Q99N27	NA	NA	NA	NA	NA	NA	NA	NA	NA	NA	NA	NA	-0.00810888	-0.0234967	0.0316056
Q99NA5	-0.0485561	0.110595	-0.0620392	0.0456706	0.0765085	-0.122179	-0.0583282	0.0716151	-0.0132869	-0.169263	-0.067755	0.237019	0.19989	-0.155202	-0.0446874
Q99NB9	0.029527	-0.00205783	-0.0274691	0.0120229	-0.0149908	0.00296782	-0.0598002	0.0881425	-0.0283423	-0.157213	0.0352347	0.121978	-0.0184027	-0.00968426	0.0280869
Q99PF5	0.0193156	-0.0252559	0.00594031	0.100858	-0.0627646	-0.0380935	-0.0388861	0.0614364	-0.0225503	-0.0720045	0.0616394	0.0103651	0.0309523	-0.00596362	-0.0249887
Q99PL5	-0.144314	0.0959985	0.0483153	0.236926	-0.318904	0.0819777	-0.065952	0.0515061	0.0144459	-0.215533	0.0715743	0.143959	-0.030751	0.0301269	0.000624077
Q99PT1	0.0275953	-0.0183439	-0.00925143	0.0258849	-0.00406771	-0.0218172	-0.0351853	0.0404776	-0.00529233	-0.029419	0.0527912	-0.0233722	0.00158792	-0.0121435	0.0105556
Q99PV0	0.0365556	0.0605357	-0.0970913	-0.0108304	0.0178089	-0.00697852	-0.0417906	0.0808437	-0.0390531	-0.109069	0.0486245	0.0604447	0.0451249	-0.0876962	0.0425714
Q9CPT4	-0.0841459	-2.21e-05	0.084168	-0.0117819	-0.120276	0.132058	NA	NA	NA	NA	NA	NA	-0.16993	0.011945	0.157985
Q9CPW5	NA	NA	NA	-0.0197543	0.0400949	-0.0203406	NA	NA	NA	NA	NA	NA	NA	NA	NA
Q9CQ19	NA	NA	NA	NA	NA	NA	NA	NA	NA	0.0269073	0.325227	-0.352134	NA	NA	NA
Q9CQA1	NA	NA	NA	NA	NA	NA	NA	NA	NA	-0.0180265	-0.0754712	0.0934978	-0.0545868	0.0321417	0.022445
Q9CQC6	NA	NA	NA	NA	NA	NA	NA	NA	NA	NA	NA	NA	-0.0100607	0.00635943	0.00370126
Q9CQD1	NA	NA	NA	NA	NA	NA	0.0406086	-0.0861629	0.0455542	NA	NA	NA	NA	NA	NA
Q9CQE8	NA	NA	NA	-0.120908	0.0762523	0.0446554	0.0489123	0.10527	-0.154182	-0.0634349	-0.101125	0.16456	0.241047	-0.287498	0.0464514
Q9CQF3	-0.0133119	-0.0172114	0.0305233	0.0191365	-0.0550654	0.0359289	-0.044521	-0.0363211	0.0808421	-0.198692	0.0474063	0.151286	-0.0288705	0.0546825	-0.0258121
Q9CQI7	0.0820258	-0.0569513	-0.0250745	0.061801	-0.109406	0.0476053	-0.0692173	0.0464069	0.0228104	-0.0777559	-0.0294777	0.107234	-0.0457126	-0.0833511	0.129064
Q9CQM5	0.0717837	-0.0676051	-0.00417863	0.0491795	-0.0920559	0.0428765	-0.0277331	0.0359317	-0.00819865	0.108085	-0.136385	0.028301	0.0988699	-0.275031	0.176161
Q9CQM9	-0.258423	0.159913	0.0985099	NA	NA	NA	-0.0197416	0.0377075	-0.0179659	-0.0992227	0.0807253	0.0184974	0.0747419	-0.0251284	-0.0496135
Q9CQN6	NA	NA	NA	-0.041928	0.124535	-0.0826074	0.236998	-0.0472661	-0.189732	NA	NA	NA	NA	NA	NA
Q9CQR6	0.0818979	-0.0452275	-0.0366703	0.0180749	-0.0202754	0.00220052	-0.0302032	-0.0833763	0.113579	-0.014527	-0.0407489	0.0552759	0.0256384	-0.056902	0.0312636
Q9CQW2	-0.0462141	0.0358935	0.0103206	NA	NA	NA	0.00916715	0.158874	-0.168041	0.0929857	0.0753755	-0.168361	-0.102475	0.0907132	0.0117618
Q9CQY5	0.099092	-0.0402182	-0.0588738	0.0234371	0.0100043	-0.0334413	NA	NA	NA	-0.0945923	0.0332105	0.0613819	NA	NA	NA
Q9CR00	NA	NA	NA	NA	NA	NA	NA	NA	NA	0.0358931	-0.0147681	-0.021125	NA	NA	NA
Q9CR67	-0.0624126	0.0219656	0.040447	0.0215629	0.0269063	-0.0484692	-0.0541194	0.0130289	0.0410905	NA	NA	NA	NA	NA	NA
Q9CSU0	NA	NA	NA	0.020191	-0.0321582	0.0119672	NA	NA	NA	0.00625787	-0.0966468	0.0903889	-0.060383	-0.199912	0.260295
Q9CT10	0.0941283	-0.117116	0.0229873	NA	NA	NA	NA	NA	NA	-0.096292	-0.025031	0.121323	0.0947401	-0.131973	0.0372334
Q9CU62	-0.00332599	-0.0177286	0.0210546	0.00508605	-0.0341085	0.0290224	-0.0112707	0.0268125	-0.0155418	-0.0172663	-0.0117049	0.0289712	0.00891239	-0.0360021	0.0270897
Q9CW03	0.0378378	-0.0870863	0.0492485	0.0285673	-0.056843	0.0282756	0.00742375	0.0240125	-0.0314362	-0.0443269	0.0509197	-0.00659278	0.0232131	-0.0376498	0.0144367
Q9CWK8	0.0434133	0.0670872	-0.110501	0.0495719	0.00684016	-0.056412	0.0755151	-0.149016	0.0735005	-0.0689169	-0.0175608	0.0864777	-0.0193063	-0.0550273	0.0743336
Q9CWM4	NA	NA	NA	-0.0179417	0.0380017	-0.0200599	NA	NA	NA	-0.0710886	0.0249682	0.0461204	-0.0313653	0.0434597	-0.0120944
Q9CWP6	-0.0147725	0.0596461	-0.0448736	-0.07029	0.0195271	0.0507629	NA	NA	NA	0.0621827	-0.0650116	0.0028289	NA	NA	NA
Q9CWZ7	0.0707954	0.0188799	-0.0896753	0.0762248	-0.0351524	-0.0410724	NA	NA	NA	NA	NA	NA	NA	NA	NA
Q9CX00	-0.00109075	-0.0678876	0.0689784	0.0970108	-0.0631084	-0.0339024	0.0083292	7.8e-05	-0.00840716	-0.0354988	-0.00854251	0.0440413	0.000602548	0.00779975	-0.00840229
Q9CX56	-0.0337185	0.193046	-0.159327	-0.0725269	0.108039	-0.0355117	-0.0731925	0.0388909	0.0343016	-0.0953215	0.0174386	0.0778829	-0.0508317	0.0547298	-0.00389811
Q9CX86	-0.0215284	-0.107246	0.128775	0.122239	-0.224849	0.10261	-0.142109	0.125546	0.016563	-0.26181	0.0317851	0.230025	0.019995	-0.108707	0.0887119
Q9CXP8	0.0849331	0.0731213	-0.158054	NA	NA	NA	NA	NA	NA	0.0505739	0.118271	-0.168845	NA	NA	NA
Q9CXY6	0.0110618	-0.0220256	0.0109639	0.106064	-0.0843769	-0.0216868	-0.0478822	0.0337914	0.0140909	-0.164682	0.0789193	0.0857624	-0.0178507	-0.0684921	0.0863428
Q9CY50	-0.109934	0.0222461	0.0876879	-0.0467634	-0.0584985	0.105262	-0.111021	0.0136429	0.097378	-0.0938828	-0.15727	0.251152	-0.0390365	-0.0665431	0.10558
Q9CYK2	0.115577	-0.0894347	-0.0261422	-0.0542879	-0.0175036	0.0717915	0.0405849	-0.0718378	0.0312529	0.261583	-0.254533	-0.00704959	-0.244672	0.192814	0.0518589
Q9CYL5	0.0643347	0.0236016	-0.0879363	-0.0406368	0.102661	-0.0620242	0.0792457	-0.0530302	-0.0262155	0.0996731	-0.0365812	-0.0630919	-0.0538659	0.0246779	0.029188
Q9CYN2	0.0486639	-0.041811	-0.00685291	-0.0191142	0.0169739	0.00214023	0.0105861	0.0276985	-0.0382846	-0.0797065	0.0481749	0.0315316	0.0580459	-0.0888174	0.0307715
Q9CZE3	0.0907357	0.0260206	-0.116756	0.238578	-0.214375	-0.0242027	0.0218206	0.0362202	-0.0580408	0.0946296	7.08e-06	-0.0946367	-0.0173396	0.044023	-0.0266834
Q9CZM2	-0.115329	-0.0684707	0.183799	-0.0665258	-0.208145	0.274671	-0.282384	0.119206	0.163178	-0.367083	0.0646972	0.302386	-0.0908819	-0.117129	0.208011
Q9CZX8	-0.175576	-1.37e-05	0.17559	0.0124535	-0.140916	0.128463	-0.25353	0.0975169	0.156013	-0.317005	0.0831339	0.233871	-0.0934027	-0.0160348	0.109437
Q9CZY3	0.0234066	-0.0477203	0.0243137	NA	NA	NA	-0.0247997	-4.42e-05	0.0248438	NA	NA	NA	-0.0139154	-0.0389952	0.0529106
Q9D0F9	0.108215	-0.0746339	-0.0335809	NA	NA	NA	0.0584759	-0.081305	0.022829	0.245375	-0.0566599	-0.188715	-0.0210238	0.00427146	0.0167523
Q9D0J8	0.100996	-0.0663613	-0.0346348	0.119971	-0.117897	-0.00207329	0.00393859	0.0771169	-0.0810555	-0.00230278	0.0915682	-0.0892655	0.0134892	-0.0708862	0.0573969
Q9D0M3	0.00206753	0.0172491	-0.0193167	0.133589	-0.00832288	-0.125266	NA	NA	NA	-0.148551	0.0869777	0.0615732	NA	NA	NA
Q9D0R2	NA	NA	NA	0.0395359	-0.0519756	0.0124397	0.0189793	-0.0404754	0.0214961	NA	NA	NA	NA	NA	NA
Q9D0R8	NA	NA	NA	NA	NA	NA	NA	NA	NA	-0.0592715	-0.0395087	0.0987801	NA	NA	NA
Q9D0T1	0.0480699	-0.0509246	0.00285466	0.0717553	-0.00626758	-0.0654877	NA	NA	NA	-0.192986	0.0389004	0.154086	NA	NA	NA
Q9D0W5	-0.00597096	0.00128981	0.00468115	NA	NA	NA	0.0160517	-0.0468665	0.0308148	-0.0805663	0.0989287	-0.0183623	NA	NA	NA
Q9D1K2	0.0704636	0.0267061	-0.0971698	0.0634099	-0.0166083	-0.0468016	0.0145122	0.0463121	-0.0608243	0.00195293	0.0980195	-0.0999724	NA	NA	NA
Q9D1M4	NA	NA	NA	NA	NA	NA	NA	NA	NA	-0.0594278	0.104221	-0.0447929	NA	NA	NA
Q9D1Q6	-0.0229897	0.039818	-0.0168283	0.150393	-0.170309	0.0199157	0.014145	-0.0627412	0.0485962	0.00272926	-0.0672709	0.0645417	-0.101868	0.056558	0.0453104
Q9D287	NA	NA	NA	NA	NA	NA	NA	NA	NA	-0.107426	-0.0428832	0.150309	0.0543629	-0.139559	0.0851961
Q9D2R0	NA	NA	NA	-0.0591348	-0.0686302	0.127765	NA	NA	NA	0.0824882	-0.216381	0.133893	0.0542652	0.01362	-0.0678852
Q9D2V7	0.0165733	-0.0139799	-0.00259334	0.0302785	-0.058756	0.0284774	-0.0198738	0.0499528	-0.030079	0.00276212	0.0474186	-0.0501807	0.0876099	-0.0610799	-0.02653
Q9D3G5	NA	NA	NA	NA	NA	NA	NA	NA	NA	NA	NA	NA	0.00779742	-0.0194016	0.0116042
Q9D3J5	-0.10902	0.140809	-0.031789	-0.44283	0.145262	0.297569	-0.0254289	-0.0966681	0.122097	NA	NA	NA	NA	NA	NA
Q9D554	-0.0074467	-0.0268862	0.0343329	0.00169808	0.0349105	-0.0366086	-0.043431	0.143351	-0.0999204	-0.132234	0.0502755	0.0819581	-0.0161873	-0.0375512	0.0537385
Q9D5V5	NA	NA	NA	0.000839545	-0.0678031	0.0669636	NA	NA	NA	NA	NA	NA	NA	NA	NA
Q9D620	NA	NA	NA	0.139608	-0.123477	-0.0161314	NA	NA	NA	NA	NA	NA	NA	NA	NA
Q9D662	NA	NA	NA	NA	NA	NA	NA	NA	NA	-0.0647433	0.0680771	-0.00333381	NA	NA	NA
Q9D6Y9	0.0285349	0.0534398	-0.0819747	0.129454	0.0549122	-0.184366	0.0176282	0.051692	-0.0693202	0.168552	-0.0499679	-0.118585	-0.0254756	-0.00281227	0.0282879
Q9D6Z1	0.0514175	0.0258993	-0.0773168	0.136691	-0.04459	-0.0921015	NA	NA	NA	-0.0630355	-0.0400884	0.103124	0.073611	-0.0478615	-0.0257495
Q9D7M1	0.168563	0.0422465	-0.316214	-0.314346	0.127404	0.186942	NA	NA	NA	NA	NA	NA	NA	NA	NA
Q9D7M8	0.00307608	0.209717	-0.212793	0.277838	-0.137668	-0.14017	NA	NA	NA	NA	NA	NA	NA	NA	NA
Q9D7Q1	0.0485848	-0.109565	0.0609801	-0.165506	0.13068	0.0348267	NA	NA	NA	0.204958	-0.196544	-0.00841409	0.0485788	-0.0698354	0.0212566
Q9D7S9	-0.00336004	0.0153234	-0.0119634	-0.00250327	0.0854047	-0.0829014	-0.0448148	-0.0158302	0.0606449	-0.029779	0.0199612	0.00981788	-0.00173685	0.0298901	-0.0281533
Q9D819	-0.0464954	0.0605042	-0.0140088	-0.096359	0.0239992	0.0723598	-0.137781	0.202404	-0.064623	-0.0559844	-0.019916	0.0759003	0.00483251	0.0222261	-0.0270586
Q9D823	NA	NA	NA	NA	NA	NA	NA	NA	NA	-0.502434	0.330265	0.172169	NA	NA	NA
Q9D855	NA	NA	NA	NA	NA	NA	NA	NA	NA	NA	NA	NA	-0.0340157	-0.0306164	0.0646321
Q9D868	-0.0131388	0.00722054	0.00591822	-0.0337427	-0.0656119	0.0993546	NA	NA	NA	NA	NA	NA	0.149944	-0.0389042	-0.11104
Q9D880	NA	NA	NA	-0.0755766	0.0603948	0.0151818	NA	NA	NA	-0.107279	0.0360696	0.0712091	-0.0176158	0.00103718	0.0165786
Q9D883	-0.00755547	0.0528618	-0.0453063	NA	NA	NA	0.0296912	-0.0136645	-0.0160266	-0.0379034	-0.097316	0.135219	NA	NA	NA
Q9D8B3	0.00457272	0.0328481	-0.0374208	-0.0529269	0.0130065	0.0399204	0.00477031	-0.0588723	0.054102	0.0276248	0.000424623	-0.0280494	0.00580538	-0.0166562	0.0108509
Q9D8C4	NA	NA	NA	NA	NA	NA	NA	NA	NA	0.179579	-0.140017	-0.0395621	NA	NA	NA
Q9D8T2	NA	NA	NA	0.0061379	0.0456319	-0.0517699	NA	NA	NA	NA	NA	NA	NA	NA	NA
Q9D8V0	NA	NA	NA	0.047198	-0.0192774	-0.0279206	NA	NA	NA	NA	NA	NA	NA	NA	NA
Q9D8V7	0.161437	-0.0507667	-0.11067	-0.288423	0.144302	0.144122	-0.0677756	0.0747202	-0.00694464	0.0588423	-0.0121536	-0.0466887	NA	NA	NA
Q9D8W5	0.0520849	-0.0907094	0.0386244	-0.0213322	0.0123487	0.00898347	0.000804068	0.0737941	-0.0745982	-0.0351352	0.0241338	0.0110014	-0.0343429	0.0267927	0.00755024
Q9D967	-0.0274565	0.00624746	0.0212091	NA	NA	NA	NA	NA	NA	NA	NA	NA	-0.0714594	0.0893102	-0.0178508
Q9DB15	0.0397761	0.0745645	-0.114341	0.0469099	-0.0249702	-0.0219397	NA	NA	NA	NA	NA	NA	NA	NA	NA
Q9DB27	NA	NA	NA	-0.0996315	0.061792	0.0378395	NA	NA	NA	NA	NA	NA	NA	NA	NA
Q9DB34	0.0501899	-0.00328723	-0.0469026	-0.0421242	0.0757385	-0.0336143	0.159321	-0.175947	0.0166268	0.142025	-0.0126263	-0.129399	0.000774399	-0.0143663	0.0135919
Q9DBB4	NA	NA	NA	-0.129896	0.0614399	0.0684563	NA	NA	NA	0.090297	0.0524831	-0.14278	NA	NA	NA
Q9DBG5	NA	NA	NA	0.0840117	0.0334917	-0.117503	NA	NA	NA	NA	NA	NA	NA	NA	NA
Q9DBG7	0.0258518	0.00260903	-0.0284608	NA	NA	NA	NA	NA	NA	NA	NA	NA	NA	NA	NA
Q9DBH5	-0.0106427	-0.0473404	0.0579832	0.035093	-0.0344239	-0.000669069	-0.00528773	0.0303427	-0.0250549	-0.0515179	0.0313696	0.0201483	-0.0144609	-0.0076852	0.0221461
Q9DBJ1	-0.00288339	-0.0300174	0.0329008	-0.0583345	0.0649264	-0.00659195	0.0338536	-0.0688813	0.0350277	0.0231495	-0.0117777	-0.0113718	0.0300057	-0.0389811	0.00897538
Q9DBL7	NA	NA	NA	0.100366	0.100197	-0.200563	-0.0283004	0.0735204	-0.04522	NA	NA	NA	NA	NA	NA
Q9DBR1	NA	NA	NA	NA	NA	NA	NA	NA	NA	-0.112125	0.258294	-0.146168	NA	NA	NA
Q9DBR3	NA	NA	NA	0.0137216	-0.0582864	0.0445647	NA	NA	NA	0.000720339	-0.0386317	0.0379113	-0.0761988	-0.0341714	0.11037
Q9DBZ5	NA	NA	NA	NA	NA	NA	NA	NA	NA	-0.176611	-0.0113712	0.187982	NA	NA	NA
Q9DCD6	0.018624	0.0153476	-0.0339716	NA	NA	NA	0.0610409	-0.0901977	0.0291567	-0.00723707	0.0141534	-0.00691629	0.00856367	0.0143596	-0.0229233
Q9DCF9	-0.156864	0.0186438	0.13822	-0.0130597	-0.0549562	0.0680159	-0.0485012	-0.0670827	0.115584	NA	NA	NA	NA	NA	NA
Q9DCH4	-0.10685	0.00533763	0.101512	-0.00716869	0.00811224	-0.000943554	-0.142855	0.0691001	0.073755	-0.113295	0.0269187	0.0863764	-0.0700038	-0.00826113	0.078265
Q9DCM0	0.0193593	-0.0300523	0.010693	0.0365463	0.117902	-0.154449	NA	NA	NA	NA	NA	NA	NA	NA	NA
Q9DCT2	0.0824818	0.00607243	-0.0885543	NA	NA	NA	NA	NA	NA	NA	NA	NA	NA	NA	NA
Q9DCV4	NA	NA	NA	NA	NA	NA	NA	NA	NA	0.346184	-0.201637	-0.144546	NA	NA	NA
Q9DCZ1	NA	NA	NA	NA	NA	NA	0.235032	0.0371175	-0.27215	-0.0126535	-0.053721	0.0663745	NA	NA	NA
Q9EPB1	0.0637758	-0.0760771	0.0123013	-0.0350795	0.0703212	-0.0352417	0.05449	0.00486971	-0.0593597	-0.0808814	0.118178	-0.0372968	-0.0123365	0.0469803	-0.0346438
Q9EPJ9	NA	NA	NA	-0.0346669	-0.0714001	0.106067	NA	NA	NA	NA	NA	NA	NA	NA	NA
Q9EPK2	0.037153	-0.0285585	-0.00859451	0.00808742	-0.0937157	0.0856283	-0.019195	0.0259172	-0.00672225	0.0113803	0.0354991	-0.0468794	-0.0332131	0.00202266	0.0311904
Q9EPK7	0.00840797	-0.0760688	0.0676608	NA	NA	NA	NA	NA	NA	-0.032518	0.0168178	0.0157002	0.068701	0.00130923	-0.0700102
Q9EPL4	-0.22408	0.184194	0.0398858	-0.273782	0.151839	0.121943	-0.0294723	-0.129507	0.15898	-0.0427237	-0.113026	0.155749	-0.256958	0.0228856	0.234072
Q9EPL8	-0.0480312	-0.00885905	0.0568902	-0.0134507	-0.187589	0.20104	-0.030752	0.108027	-0.0772754	-0.130728	0.0560984	0.0746296	0.109673	-0.078869	-0.0308036
Q9EPU0	0.114368	0.0257223	-0.14009	0.0515252	-0.128823	0.0772976	0.0851006	-0.0649346	-0.020166	-0.0427757	-0.00973778	0.0525135	0.0219195	-0.0490856	0.0271662
Q9EPV5	0.037038	0.136642	-0.17368	0.0166066	-0.0577096	0.041103	NA	NA	NA	-0.0205953	0.00562077	0.0149746	-0.0657359	0.0434309	0.022305
Q9EPY0	0.0340159	0.0121315	-0.0461473	-0.168169	0.0715416	0.0966269	-0.0707778	0.0532305	0.0175473	-0.0532288	0.0766662	-0.0234375	-0.127922	0.0844054	0.043517
Q9EQH3	0.0798351	-0.0458549	-0.0339803	-0.0346081	0.0310761	0.00353204	0.0709428	-0.0176915	-0.0532513	0.000844296	0.0598016	-0.0606459	0.037561	-0.00848356	-0.0290774
Q9EQP2	0.0328864	0.0118308	-0.0447172	-0.0168632	-0.00963628	0.0264995	-0.110839	0.0873006	0.023538	-0.0104928	0.0220247	-0.0115319	0.0393264	0.0082815	-0.0476079
Q9EQR2	-0.13204	0.0766636	0.0553769	-0.0834328	0.0459609	0.0374719	0.135687	-0.1121	-0.0235863	-0.0806653	0.0415915	0.0390738	0.0590801	-0.0128339	-0.0462462
Q9EQS0	-0.012383	-0.0304671	0.0428501	0.0104154	-0.0561606	0.0457452	-0.0279819	-0.0185657	0.0465476	0.0231347	0.0235359	-0.0466706	0.0111003	-0.0523107	0.0412104
Q9EQS3	-0.0745794	-0.041967	0.116546	-0.141396	-0.0362516	0.177648	0.0367001	-0.163814	0.127114	-0.129856	0.0222622	0.107593	-0.124799	2.09e-05	0.124778
Q9EQV6	NA	NA	NA	NA	NA	NA	NA	NA	NA	0.0235279	-0.105277	0.0817492	NA	NA	NA
Q9EQX9	0.0389991	-0.0368438	-0.00215529	-0.0110255	0.0113296	-0.0003041	-0.0469824	0.0405159	0.00646643	-0.0327624	0.00663395	0.0261285	0.0547527	-0.0755241	0.0207714
Q9ER24	-0.177161	0.0385887	0.138572	-0.346294	0.133933	0.212362	NA	NA	NA	NA	NA	NA	NA	NA	NA
Q9ER34	NA	NA	NA	NA	NA	NA	NA	NA	NA	-0.0817334	0.0277021	0.0540312	0.000734412	0.0339973	-0.0347317
Q9ERA9	NA	NA	NA	NA	NA	NA	NA	NA	NA	NA	NA	NA	0.0576396	-0.0229508	-0.0346888
Q9ERD8	-0.0124419	0.0823536	-0.0699117	NA	NA	NA	NA	NA	NA	-0.0236368	0.107625	-0.0839883	NA	NA	NA
Q9ERK4	-0.0178261	-0.00953376	0.0273599	-0.0993841	0.0903386	0.00904551	-0.041923	0.0283201	0.0136028	-0.0609404	0.00765745	0.0532829	0.0816548	-0.0302859	-0.0513689
Q9ERN0	0.101456	-0.0447734	-0.0566823	-0.0493595	0.0677605	-0.018401	0.0642694	-0.0857556	0.0214862	0.0806717	-0.066133	-0.0145387	-0.0315879	0.0188916	0.0126963
Q9ERR2	NA	NA	NA	NA	NA	NA	NA	NA	NA	-0.0638456	0.0523192	0.0115265	NA	NA	NA
Q9ERU9	NA	NA	NA	0.0481834	-0.0531168	0.00493333	NA	NA	NA	-0.078581	0.0252199	0.0533612	NA	NA	NA
Q9ES21	-0.0553931	0.0572819	-0.00188884	-0.212851	0.18612	0.0267308	0.0220658	0.00915838	-0.0312242	-0.000141267	0.0539898	-0.0538486	-0.00827897	0.0264448	-0.0181659
Q9ES40	-0.0973	0.213355	-0.116055	0.0176413	0.116226	-0.133867	0.210069	-0.0106527	-0.199416	0.026798	-0.0217904	-0.00500754	-0.102543	0.373939	-0.271396
Q9ES54	NA	NA	NA	0.0343484	-0.0946903	0.0603419	NA	NA	NA	NA	NA	NA	NA	NA	NA
Q9ESH6	-0.0542211	-0.143652	0.197873	0.0258347	-0.0632011	0.0373664	0.0576946	0.0783692	-0.136064	0.0533074	-0.134615	0.0813079	-0.0820061	0.0124998	0.0695063
Q9ESN0	0.10954	0.0488311	-0.158371	-0.00647857	0.018989	-0.0125105	0.0267228	0.0273885	-0.0541112	0.090107	-0.0577802	-0.0323268	0.0913768	-0.0117178	-0.079659
Q9ESP1	NA	NA	NA	NA	NA	NA	NA	NA	NA	NA	NA	NA	-0.107938	0.0956086	0.0123293
Q9EST5	0.00378159	-0.109636	0.105854	NA	NA	NA	-0.0509955	0.176816	-0.125821	0.0703439	-0.0797093	0.00936536	NA	NA	NA
Q9EST6	NA	NA	NA	-0.000595674	0.0795351	-0.0789394	NA	NA	NA	NA	NA	NA	-0.106802	0.0864356	0.0203667
Q9ET30	NA	NA	NA	NA	NA	NA	NA	NA	NA	0.0765306	-0.0493443	-0.0271863	NA	NA	NA
Q9JHJ0	0.0791318	-0.0220257	-0.0571061	0.100628	-0.0682658	-0.0323626	-0.0709551	0.105035	-0.0340795	0.0305777	-0.00459787	-0.0259798	0.0150441	-0.0303195	0.0152755
Q9JHL4	0.026608	0.0322259	-0.0588339	-0.063548	0.0339472	0.0296008	0.024671	-0.0387573	0.0140863	0.00584069	0.0242282	-0.0300689	0.0181321	0.00581871	-0.0239508
Q9JHS3	NA	NA	NA	NA	NA	NA	NA	NA	NA	0.15956	-0.232285	0.0727246	NA	NA	NA
Q9JHW0	0.0900415	-0.0586	-0.0314415	NA	NA	NA	NA	NA	NA	NA	NA	NA	NA	NA	NA
Q9JHW5	0.102993	0.00187152	-0.104864	-0.060154	-0.0245658	0.0847198	0.0610849	-0.0227049	-0.03838	-0.0192685	-0.156064	0.175333	NA	NA	NA
Q9JI11	0.0476247	0.00537494	-0.0529996	0.0221355	-0.0146883	-0.00744717	0.0745077	-0.0153518	-0.0591559	0.0488881	0.00875423	-0.0576424	0.0417837	-0.00238267	-0.0394011
Q9JI85	-0.0632018	-0.0940515	0.157253	0.159664	-0.0571822	-0.102482	-0.0757741	-0.0305026	0.106277	-0.139939	-0.0383445	0.178284	-0.0778737	0.0368663	0.0410075
Q9JI92	0.216884	0.115494	-0.332379	0.0589841	0.015857	-0.0748411	NA	NA	NA	0.22699	-0.00384692	-0.223143	0.15678	-0.19699	0.0804182
Q9JIA7	NA	NA	NA	NA	NA	NA	NA	NA	NA	0.0435418	-0.0739259	0.030384	NA	NA	NA
Q9JIH7	NA	NA	NA	-0.0331903	0.00625982	0.0269305	NA	NA	NA	NA	NA	NA	NA	NA	NA
Q9JII5	NA	NA	NA	0.0353664	-0.160477	0.12511	NA	NA	NA	NA	NA	NA	0.109775	-0.110893	0.00111713
Q9JIL3	0.0358874	-0.029861	-0.00602641	0.0558283	-0.15923	0.103402	NA	NA	NA	-0.157484	0.0487774	0.108707	0.00666376	-0.0811212	0.0744574
Q9JIQ3	NA	NA	NA	NA	NA	NA	NA	NA	NA	NA	NA	NA	0.0566418	0.00618498	-0.0628268
Q9JIX8	0.0518831	-0.0581531	0.00626996	0.00549176	-0.0788094	0.0733176	NA	NA	NA	-0.175881	-0.00942249	0.185303	NA	NA	NA
Q9JIY5	NA	NA	NA	NA	NA	NA	NA	NA	NA	0.0574018	-0.0499095	-0.00749228	0.106384	-0.0215607	-0.0848229
Q9JJ00	NA	NA	NA	0.0692389	0.0316236	-0.100862	0.0205037	0.021723	-0.0422267	0.053533	-0.0163966	-0.0371364	0.05403	-0.102782	0.0487525
Q9JJ19	0.0408607	-0.00501973	-0.035841	0.0443289	-0.0347292	-0.00959976	0.0520865	-0.0330594	-0.0190271	0.0997796	-0.0918297	-0.00794994	0.0641157	0.02475	-0.0888657
Q9JJ22	NA	NA	NA	-0.00302801	0.0366402	-0.0336122	0.116155	-0.117439	0.00128357	0.0806311	-0.086624	-0.0156631	0.111414	-0.117955	0.00872106
Q9JJ28	0.0897827	-0.0135824	-0.0762004	0.00869602	-0.00835239	-0.000343631	0.0165275	0.0172982	-0.0338256	0.048029	0.0514893	-0.0995183	0.0540216	-0.0287826	-0.025239
Q9JJ54	0.0478146	-0.0359161	-0.0118984	0.10335	-0.0583114	-0.0450382	NA	NA	NA	NA	NA	NA	0.0102512	-0.0824187	0.0721675
Q9JJM9	0.0787375	-0.100034	0.0212965	-0.0355526	0.0720498	-0.0364972	0.0303007	-0.0201198	-0.010181	0.0685131	-0.00351786	-0.0649952	0.0102552	-0.0477938	0.0375386
Q9JJU8	-0.0336497	-0.0761312	0.109781	-0.0811571	0.0314472	0.0497099	-0.0586344	0.00148405	0.0571504	0.00454364	-0.00252241	-0.00202123	-0.0519788	0.0266329	0.0253459
Q9JJW3	NA	NA	NA	NA	NA	NA	NA	NA	NA	NA	NA	NA	0.0140184	-0.00213907	-0.0118794
Q9JK11	-0.145934	0.125532	0.0204026	-0.0795727	0.0922523	-0.0126796	0.00821269	-0.0367292	0.0285165	-0.0476111	0.02906	0.0185511	-0.0108999	0.0201203	-0.00922038
Q9JKF1	0.0783786	-0.0134054	-0.0649732	0.0744686	-0.00292223	-0.0715463	0.072699	-0.0274862	-0.0452129	0.0782833	0.0124197	-0.0907029	-0.00146626	-0.0123817	0.013848
Q9JKP5	-0.12092	0.00512126	0.115798	0.0175072	-0.114975	0.0974681	NA	NA	NA	-0.115682	-0.0511778	0.166859	-0.0354384	-0.0288823	0.0643207
Q9JKR6	NA	NA	NA	NA	NA	NA	-0.0527012	-0.0606101	0.113311	NA	NA	NA	NA	NA	NA
Q9JKY5	0.0434011	-0.0312481	-0.012153	0.133347	-0.0216148	-0.111733	0.01923	0.0182617	-0.0374917	0.05752	-0.0286277	-0.0288923	0.068938	-0.0819229	0.0129849
Q9JL26	0.115291	-0.0199539	-0.0953368	0.135675	-0.0225483	-0.113127	0.0717453	0.0792901	-0.151035	0.0527786	0.0589814	-0.11176	0.00829681	0.000539264	-0.00883607
Q9JLA3	0.0428477	-0.0126308	-0.0302169	0.0196839	-0.0427728	0.0230889	0.0316622	0.0180834	-0.0497456	-0.0185462	-0.00144598	0.0199922	-0.0152506	-0.0210385	0.0362891
Q9JLI8	-0.0728861	0.141974	-0.0690876	NA	NA	NA	NA	NA	NA	NA	NA	NA	NA	NA	NA
Q9JLJ3	0.0983016	0.0412821	-0.139584	0.249984	-0.112832	-0.137152	-0.00739539	-0.090937	0.0983324	-0.0102128	0.00569404	0.00451872	0.0521416	-0.0268788	-0.0252628
Q9JLN4	0.0617219	-0.0878509	0.026129	-0.251947	0.19329	0.0586574	-0.135274	0.0894865	0.0457873	0.253248	-0.150998	-0.10225	-0.0722485	0.161327	-0.0890787
Q9JLQ2	0.0611813	-0.0107677	-0.0504136	0.0700109	-0.0943591	0.0243482	-0.0251428	0.0673922	-0.0422494	0.0758663	-0.0652632	-0.0106031	0.0162274	-0.078213	0.0619856
Q9JLT6	0.0151597	-0.0441058	0.0289461	0.0647725	0.0258658	-0.0906383	0.128754	-0.0588084	-0.0699458	0.0577351	-0.0183804	-0.0393548	-0.0602246	-0.0106463	0.0708709
Q9JLV6	3.44e-05	-0.0508536	0.0508191	-0.0620891	0.0657499	-0.00366077	0.0326405	-0.0594533	0.0268127	0.0605598	-0.0763546	0.0157948	-0.0596037	-0.0475706	0.107174
Q9JLZ1	NA	NA	NA	-0.0221128	-0.0256935	0.0478063	NA	NA	NA	NA	NA	NA	NA	NA	NA
Q9JM53	0.0555396	-0.0100067	-0.0455329	0.0681086	0.070642	-0.138751	-0.0651312	0.11181	-0.0466791	NA	NA	NA	0.0677621	-0.170798	0.103036
Q9JM76	0.072454	-0.0060376	-0.0664164	-0.0669667	0.0303264	0.0366404	0.0290636	0.0358478	-0.0649113	0.0540952	0.0368025	-0.0908977	0.0074555	0.0855737	-0.0930292
Q9JM90	0.0738679	0.0108974	-0.0847653	0.173739	-0.0921317	-0.0816069	-0.00885675	-0.0817857	0.0906424	NA	NA	NA	0.0287464	-0.0220686	-0.00667776
Q9JMA1	0.102634	-0.0465355	-0.0560986	0.0771486	-0.0390298	-0.0381188	0.0564893	0.0281548	-0.0846441	-0.0694382	0.0830733	-0.0136351	0.0257497	-0.047872	0.0221223
Q9JMG1	-0.227855	0.25407	-0.0262149	NA	NA	NA	NA	NA	NA	NA	NA	NA	NA	NA	NA
Q9JMH9	0.0634262	-0.0816438	0.0182175	-0.00792317	0.129102	-0.121179	NA	NA	NA	0.00451226	-0.0736899	0.0691777	NA	NA	NA
Q9QUI0	0.0606003	-0.0643409	0.00374061	0.0298318	-0.00672678	-0.023105	-0.0117821	0.0465761	-0.034794	-0.0562542	0.0599142	-0.00366004	-0.0384812	0.175675	-0.137194
Q9QUM0	-0.573443	0.603075	-0.0296315	-0.446754	0.956268	-0.509513	-0.173906	0.247051	-0.0731441	-0.319389	0.63726	-0.31787	NA	NA	NA
Q9QUN7	NA	NA	NA	NA	NA	NA	0.0526645	-0.0439043	-0.00876018	0.0819328	-0.102687	0.0207547	NA	NA	NA
Q9QUR7	-0.00349737	-0.0481732	0.0516706	-0.0924281	-0.0276292	0.120057	NA	NA	NA	0.0359103	-0.0191833	-0.016727	NA	NA	NA
Q9QWE9	0.117119	0.0631526	-0.180271	NA	NA	NA	0.143199	0.116661	-0.259859	0.043758	0.0517312	-0.0954892	NA	NA	NA
Q9QX11	NA	NA	NA	NA	NA	NA	NA	NA	NA	0.149421	0.126277	-0.275698	0.0744617	0.0378766	-0.112338
Q9QX47	NA	NA	NA	0.0428324	-0.0484595	0.0056271	NA	NA	NA	NA	NA	NA	NA	NA	NA
Q9QXA5	NA	NA	NA	NA	NA	NA	NA	NA	NA	NA	NA	NA	0.00633896	0.15034	-0.156678
Q9QXB9	0.185187	0.0187611	-0.203948	-0.103927	-0.0196974	0.123624	-0.0697447	0.0774323	-0.0076876	-0.103079	0.162401	-0.0593222	-0.0500891	-0.0499785	0.100068
Q9QXK3	-0.0434957	0.0123185	0.0311772	-0.0513984	0.0538263	-0.00242784	-0.0731873	0.0419048	0.0312825	0.0679239	-0.0509473	-0.0169765	-0.061623	-0.0311964	0.0928194
Q9QXQ0	0.0529055	-0.0353054	-0.0176001	0.0162525	0.0309093	-0.0471618	0.0526952	-0.00885519	-0.0438401	0.0796875	-0.0205132	-0.0591742	-0.00162945	-0.0115437	0.0131731
Q9QXT0	NA	NA	NA	NA	NA	NA	NA	NA	NA	-0.121511	-0.0738366	0.195347	NA	NA	NA
Q9QXU8	0.22704	-0.178393	-0.0486464	0.10277	-0.0397956	-0.0629739	NA	NA	NA	NA	NA	NA	NA	NA	NA
Q9QY17	0.0305976	-0.0514199	0.0208222	-0.0238385	-0.024764	0.0486025	NA	NA	NA	0.00811154	-0.0107331	0.00262159	-0.09918	0.0111148	0.0880652
Q9QYA2	0.0108408	0.0477198	-0.0585606	NA	NA	NA	NA	NA	NA	NA	NA	NA	NA	NA	NA
Q9QYF3	NA	NA	NA	NA	NA	NA	NA	NA	NA	0.0948524	-0.0351337	-0.0597188	NA	NA	NA
Q9QYJ0	NA	NA	NA	-0.0366075	0.0735088	-0.0369013	NA	NA	NA	NA	NA	NA	NA	NA	NA
Q9QYJ2	-0.18484	0.1499	0.0349394	NA	NA	NA	NA	NA	NA	-0.213832	0.239047	-0.0252152	NA	NA	NA
Q9QYL8	0.149651	0.0227085	-0.172359	-0.0003825	-0.064382	0.0647645	0.124198	-0.000521232	-0.123677	0.00575942	0.050309	-0.0560685	0.255046	0.0177083	-0.272754
Q9QZ23	NA	NA	NA	NA	NA	NA	NA	NA	NA	-0.213764	0.17789	0.0358739	NA	NA	NA
Q9QZ73	0.133083	-0.0679342	-0.0651492	-0.0391443	0.0195361	0.0196082	NA	NA	NA	NA	NA	NA	0.0787789	-0.052402	-0.0263769
Q9QZ86	0.064642	0.0523016	-0.116944	0.0372605	-0.0614638	0.0242034	0.0608706	0.0527885	-0.113659	-0.0980167	0.0340466	0.0639701	0.0702037	-0.064503	-0.00570068
Q9QZA2	0.0115207	-0.0147601	0.00323946	-0.0669425	0.0133866	0.0535559	-0.0107365	-0.00604723	0.0167837	0.0306118	0.0102065	-0.0408183	-0.0597628	-0.00450582	0.0642686
Q9QZC2	NA	NA	NA	NA	NA	NA	NA	NA	NA	0.190328	-0.0736529	-0.116675	NA	NA	NA
Q9QZM5	0.0838408	-0.0775146	-0.00632628	-0.0340193	0.00268817	0.0313311	0.06413	-0.092996	0.0288659	0.0748806	0.0106112	-0.0854919	-0.0113835	-0.0231935	0.0345769
Q9QZR6	0.0505304	-0.067329	0.0167986	-0.0453224	-0.00329634	0.0486187	-0.0273121	0.0896102	-0.0622981	-0.0897291	0.0292584	0.0604706	-0.0204924	0.0207983	-0.000305896
Q9R010	-0.00687556	0.00910588	-0.00223032	NA	NA	NA	NA	NA	NA	-0.140586	0.000892184	0.139694	NA	NA	NA
Q9R063	0.0389979	-0.034904	-0.00409395	-0.105373	0.183517	-0.0781435	0.038967	-0.0104637	-0.0285033	-0.0068982	0.0334854	-0.0265872	-0.0456097	0.0226919	0.0229178
Q9R085	0.0140377	-0.0570499	0.0430122	-0.0271352	-0.0400773	0.0672125	NA	NA	NA	NA	NA	NA	NA	NA	NA
Q9R0C8	NA	NA	NA	NA	NA	NA	NA	NA	NA	-0.0125101	0.0411984	-0.0286883	NA	NA	NA
Q9R0D6	-0.0609092	-0.101557	0.154654	-0.244046	0.229124	0.014922	0.0588904	-0.156586	0.0976958	0.302174	-0.180043	-0.122131	-0.0725791	0.0437557	0.0288234
Q9R0I8	0.127409	-0.0420431	-0.0853654	0.16231	-0.0375445	-0.124766	0.0412451	-0.0383738	-0.00287136	0.108687	-0.00726616	-0.101421	0.096282	-0.0562423	-0.0400397
Q9R0N0	NA	NA	NA	NA	NA	NA	-0.0694385	0.0926072	-0.0231686	-0.234438	0.124824	0.109613	NA	NA	NA
Q9R0Q7	0.0134532	0.0439889	-0.0574421	-0.0664815	0.0883081	-0.0218265	NA	NA	NA	NA	NA	NA	0.0705613	-0.0857743	0.015213
Q9R0T3	-0.124943	0.0437341	0.0812086	NA	NA	NA	NA	NA	NA	NA	NA	NA	NA	NA	NA
Q9R0U0	0.0927248	0.0167064	-0.109431	-0.0677527	0.0596125	0.00814023	-0.0298248	0.0682421	-0.0384173	-0.156182	-0.00490743	0.161089	0.203038	-0.0854804	-0.117558
Q9R112	0.0338186	0.00798106	-0.0417996	-0.0286554	0.0894985	-0.0608431	0.0612384	-0.0321384	-0.0312425	0.0470119	-0.0126028	-0.0344091	-0.0457779	0.0289882	0.0167897
Q9R189	0.113689	-0.0457405	-0.0679485	0.0818508	0.0281114	-0.109962	0.121303	-0.0496847	-0.0716183	0.161983	-0.0278237	-0.134159	0.0896667	-0.04608	-0.0435867
Q9R190	0.0164433	-0.00601117	-0.0104322	0.0151578	0.0134699	-0.0286277	-0.0210718	-0.0387745	0.0598464	-0.144885	-0.0360197	0.180905	-0.0879522	-0.05465	0.142602
Q9R1C7	-0.00252682	0.0161628	-0.013636	0.0503062	0.0106656	-0.0609718	-0.0334841	-0.0157657	0.0492497	-0.147954	0.102315	0.0456394	NA	NA	NA
Q9R1R4	NA	NA	NA	NA	NA	NA	NA	NA	NA	0.1502	-0.1418	-0.00839984	NA	NA	NA
Q9R1T1	0.157223	-0.0205602	-0.136663	-0.0443648	-0.0435536	0.0879184	0.0314163	0.14676	-0.178176	-0.1256	-0.00640704	0.132007	0.249208	-0.279595	0.0303873
Q9R1T3	0.0821196	-0.0501047	-0.032015	0.0928603	-0.111112	0.0182512	-0.106169	0.246586	-0.140417	-0.117205	0.199706	-0.0825009	-0.112637	0.0346598	0.0779767
Q9R1T4	0.0406961	-0.0753184	0.0346223	0.120368	-0.0252339	-0.0951343	0.0156136	0.0846458	-0.100259	0.0505572	-0.00537952	-0.0451777	NA	NA	NA
Q9R1Z0	-0.0663756	0.0541962	0.0121794	-0.00300189	0.184767	-0.181765	-0.0541656	0.109061	-0.0548958	-0.0506449	0.204213	-0.153568	0.0778225	0.0668562	-0.144679
Q9R233	-0.00598601	0.023061	-0.017075	0.182454	-0.0913174	-0.0911365	0.0429947	0.0573319	-0.100327	0.0203852	-0.00564108	-0.0147441	0.129892	-0.00664289	-0.123249
Q9R257	-0.135737	0.248104	-0.112367	-0.100989	-0.00636333	0.107353	0.148828	-0.181634	0.0328058	-0.156388	0.0669668	0.0894215	0.0709277	-0.201457	0.13053
Q9WTM2	NA	NA	NA	NA	NA	NA	-0.0305107	0.0582296	-0.0277189	-0.0437958	0.00506333	0.0387325	-0.07701	0.0271416	0.0498683
Q9WTM5	0.0622683	-0.0482594	-0.0140089	-0.0584971	-0.0335779	0.092075	0.0107134	0.0402702	-0.0509837	0.0179185	0.022266	-0.0401846	-0.0143487	-0.0552532	0.0696019
Q9WTT6	-0.0632167	0.119034	-0.0558173	-0.236939	0.27224	-0.0353016	-0.0121625	-0.0876801	0.0998426	0.0231946	-0.0780246	0.0548299	-0.0277812	0.0308184	-0.00303723
Q9WTV1	-0.0446336	-0.0577965	0.10243	-0.255222	0.246023	0.00919871	-0.041738	-0.0938439	0.135582	0.283606	-0.240978	-0.0426284	0.0160336	-0.00565613	-0.0103775
Q9WTV5	0.0242079	0.065856	-0.0900639	-0.0607604	0.115546	-0.0547853	-0.0214275	-0.0174244	0.0388519	NA	NA	NA	NA	NA	NA
Q9WTX6	NA	NA	NA	NA	NA	NA	NA	NA	NA	-0.080523	0.0528649	0.027658	NA	NA	NA
Q9WTY9	0.0973986	-0.0725966	-0.024802	-0.0194506	-0.0700554	0.089506	0.165617	-0.0291951	-0.136422	0.0310636	0.035046	-0.0661096	NA	NA	NA
Q9WU28	NA	NA	NA	NA	NA	NA	0.076162	-0.1149	0.0387382	-0.065366	-0.106004	0.17137	-0.031712	-0.0305164	0.0622284
Q9WU49	0.0801556	0.0198254	-0.099981	0.0513768	0.10389	-0.155267	0.235871	-0.171299	-0.0645725	0.106949	-0.0598894	-0.0470594	0.0433066	-0.00874553	-0.034561
Q9WU63	NA	NA	NA	NA	NA	NA	0.0871423	0.0262343	-0.113377	NA	NA	NA	NA	NA	NA
Q9WU70	0.137856	-0.0870587	-0.050797	NA	NA	NA	0.087514	-0.0602241	-0.0272898	0.187516	-0.0620342	-0.125482	NA	NA	NA
Q9WU83	NA	NA	NA	NA	NA	NA	NA	NA	NA	-0.122063	0.0761124	0.0459508	NA	NA	NA
Q9WUA2	-0.0234485	0.00243875	0.0210098	-0.0880025	0.0590545	0.028948	-0.0303688	0.00654202	0.0238268	-0.0162126	-0.0174686	0.0336812	0.125254	-0.036504	-0.0887498
[truncated: 48 more rows]
